# Supplementary material for: Feeding, caregiving practices, and developmental delay among children under five in lowland Nepal: a community-based cross-sectional survey
Source: PubMed Central journal article supplement (PMC9464411; doi:10.1186/s12889-022-13776-8), 2022-09-10
Supplement: 12889_2022_13776_MOESM7_ESM.pdf [file 12889_2022_13776_MOESM7_ESM.pdf]

**Supplementary table 18: Matrix summarising the multivariable analysis in the Model 3 for each indicator\***

| Variables                        | Infant and young child feeding practices indicators |                   |                        |                                       |                                                 |                           |                             |                                      | Cognitive and socio-emotional caregiving practices indicators |                   |                                             |                      |                                          |            |
|----------------------------------|-----------------------------------------------------|-------------------|------------------------|---------------------------------------|-------------------------------------------------|---------------------------|-----------------------------|--------------------------------------|---------------------------------------------------------------|-------------------|---------------------------------------------|----------------------|------------------------------------------|------------|
|                                  | Timely Initiation of breastfeeding                  | Colostrum feeding | No pre-lacteal feeding | Past 24 hours exclusive breastfeeding | Introduction of solid, semi-solid or soft foods | Minimum dietary diversity | Consumption of animal foods | Consumption of fruits and vegetables | Access to 3+ children' s books                                | Access to 2+ toys | Early stimulation and responsive caregiving | Adequate supervision | Participate in early childhood education | ECDI score |
| <b>Household characteristics</b> |                                                     |                   |                        |                                       |                                                 |                           |                             |                                      |                                                               |                   |                                             |                      |                                          |            |
| Higher wealth quintile           |                                                     | ↑                 |                        | ↑                                     |                                                 | ↑                         |                             |                                      | 0                                                             | ↑                 | 0                                           | 0                    | ↑                                        | 0          |
| Higher MAHFP                     |                                                     |                   |                        |                                       |                                                 |                           |                             |                                      |                                                               |                   |                                             |                      |                                          |            |
| No migration                     |                                                     |                   |                        |                                       |                                                 |                           |                             |                                      |                                                               |                   | ↓                                           |                      |                                          |            |
| Household size**                 |                                                     |                   |                        |                                       | ↑                                               |                           |                             |                                      |                                                               |                   | ↓                                           | ↓                    |                                          |            |
| Have access to health care       |                                                     |                   |                        | ↓                                     |                                                 |                           |                             |                                      |                                                               |                   | ↑                                           |                      |                                          |            |
| Advantaged caste                 |                                                     |                   |                        |                                       |                                                 |                           | ↓                           |                                      |                                                               |                   |                                             |                      |                                          |            |
| Hindu religion                   |                                                     |                   |                        |                                       |                                                 |                           |                             |                                      |                                                               |                   |                                             |                      |                                          |            |
| <b>Parental characteristics</b>  |                                                     |                   |                        |                                       |                                                 |                           |                             |                                      |                                                               |                   |                                             |                      |                                          |            |
| Older mothers                    | 0                                                   | 0                 | ↓                      | 0                                     | ↑                                               | ↓                         | ↓                           | 0                                    |                                                               |                   | ↑                                           |                      |                                          |            |
| More than one child              | ↑                                                   |                   |                        |                                       |                                                 |                           |                             |                                      |                                                               |                   |                                             | ↓                    |                                          |            |
| Higher maternal education        | 0                                                   | 0                 | 0                      | 0                                     | 0                                               | 0                         | 0                           | 0                                    | ↑                                                             | 0                 | ↑                                           | ↑                    | 0                                        | 0          |
| Higher father's education        |                                                     |                   |                        |                                       |                                                 |                           | ↓                           |                                      |                                                               |                   |                                             |                      |                                          |            |
| One or more antenatal visits     |                                                     |                   |                        |                                       | ↑                                               |                           |                             |                                      | ↑                                                             | ↑                 |                                             |                      |                                          |            |
| Delivery at institution          | ↑                                                   | ↑                 | ↑                      |                                       |                                                 |                           |                             |                                      |                                                               |                   |                                             |                      | ↑                                        |            |
| <b>Child characteristics</b>     |                                                     |                   |                        |                                       |                                                 |                           |                             |                                      |                                                               |                   |                                             |                      |                                          |            |
| Female child                     | 0                                                   | 0                 | 0                      | 0                                     | ↑                                               | 0                         | 0                           | 0                                    | 0                                                             | ↓                 | 0                                           | 0                    | 0                                        | 0          |
| Older children***                | ↓                                                   | ↓                 | ↓                      | 0                                     | 0                                               | ↑                         | ↑                           | ↑                                    | ↑                                                             | ↑                 | ↑                                           | ↓                    | ↑                                        | ↑          |

\* ↑ indicates positive (significant p<0.05) association, 0 indicates null association, ↓ indicates negative (significant p<0.05) association, grey shading indicates overlapping factors in same direction

\*\* The household size reference group was 6-10 members

\*\*\* Reference group in child age variable for minimum dietary diversity, consumption of animal-source foods, consumption of vegetables/fruits, access to books, access to toys and adequate supervision were older children (43-59 months) and younger children for early stimulation and responsive caregiving (24-35 months), attendance of early childhood education and ECDI score (36-43 months). The age of children at recall for four breastfeeding indicators were in months as a continuous variable.
