# Supplementary material for: Feeding, caregiving practices, and developmental delay among children under five in lowland Nepal: a community-based cross-sectional survey
Source: Springer Nature journal article supplement (doi:10.1186/s12889-022-13776-8), 2022-09-10
Supplement: MOESM1 [file 23474036]

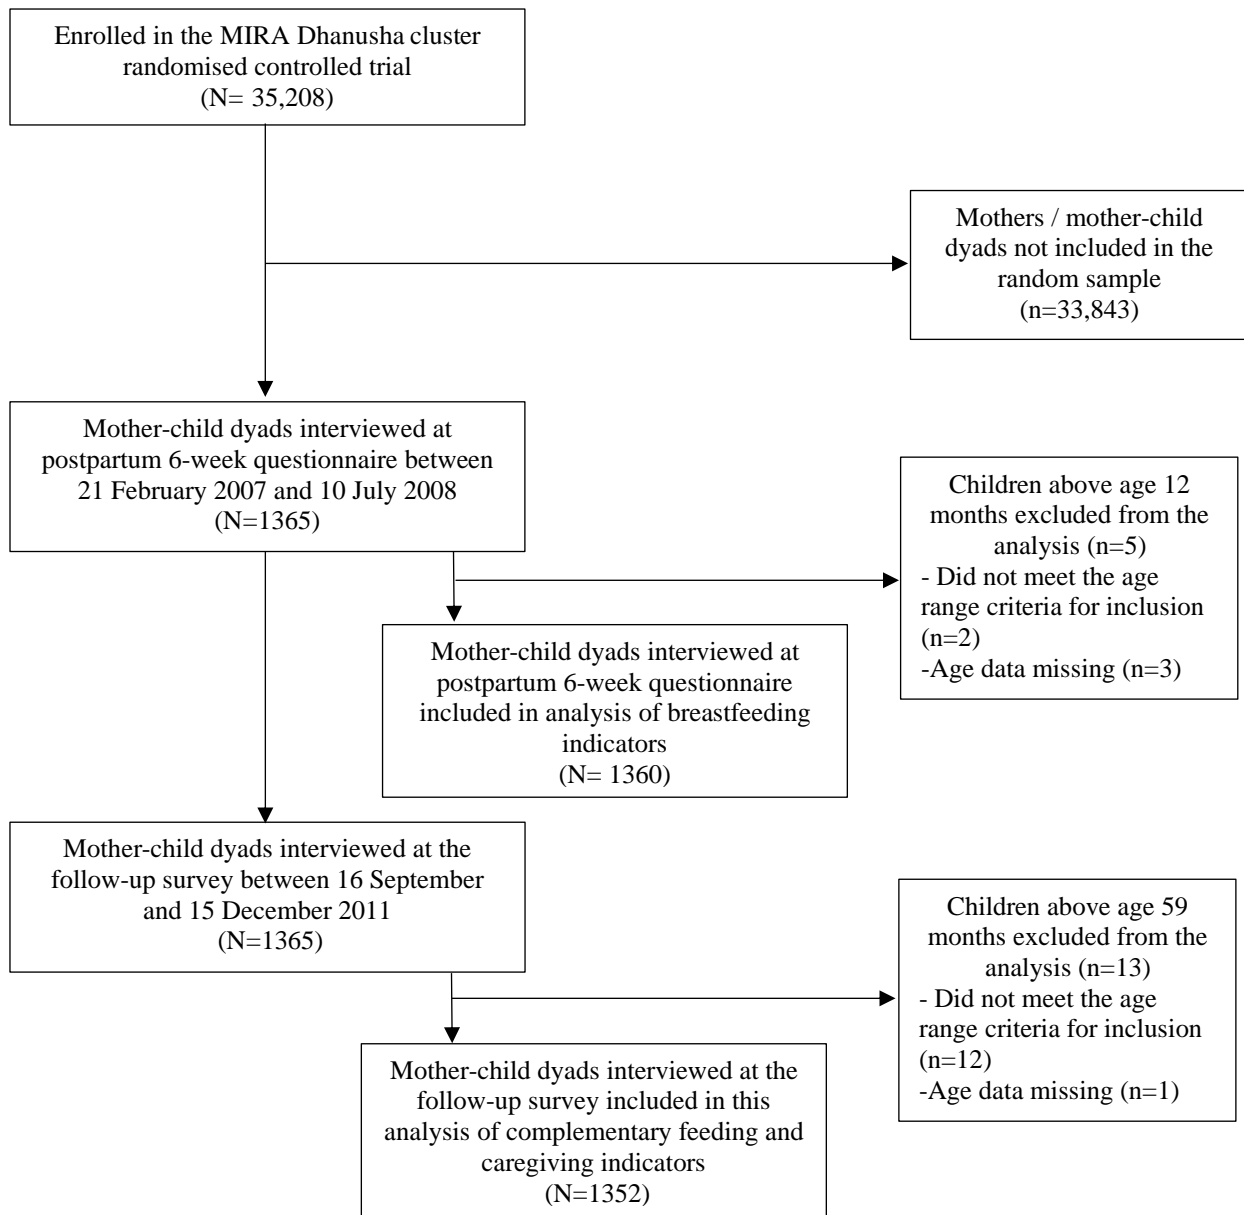

**Supplementary figure 1** Flow chart of study participants

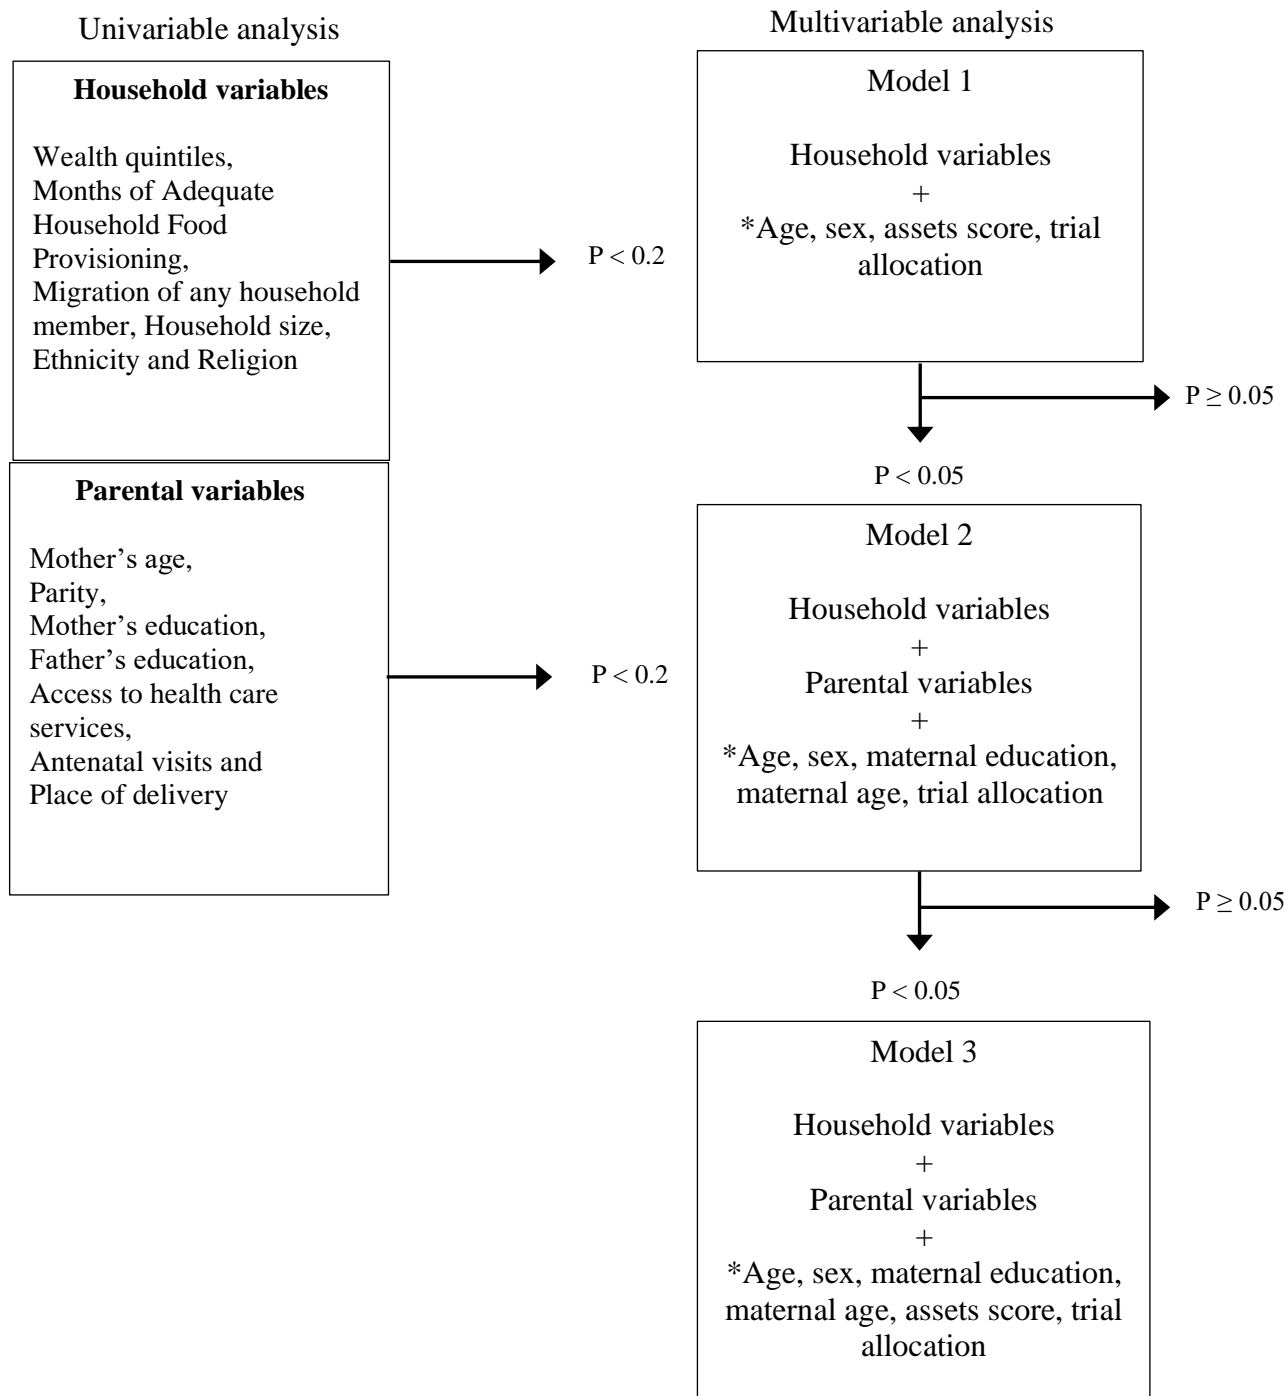

**Supplementary figure 2: Multivariable modelling procedure**

Model 1 (M1) includes all the \*pre-identified (household-level) variables + household-level variables with  $p < 0.2$  in univariable analysis; Model 2 (M2) includes all the \*pre-identified (parental-level) variables + parental-level variables with  $p < 0.2$  in univariable analyses + all the pre-identified (household-level) variables from M1+ household-level variables with  $p < 0.05$  in M1; Model 3 (final model) includes all the \*pre-identified (household or parental level) variables + parental-level and household-level variables with  $p < 0.05$  in M2.

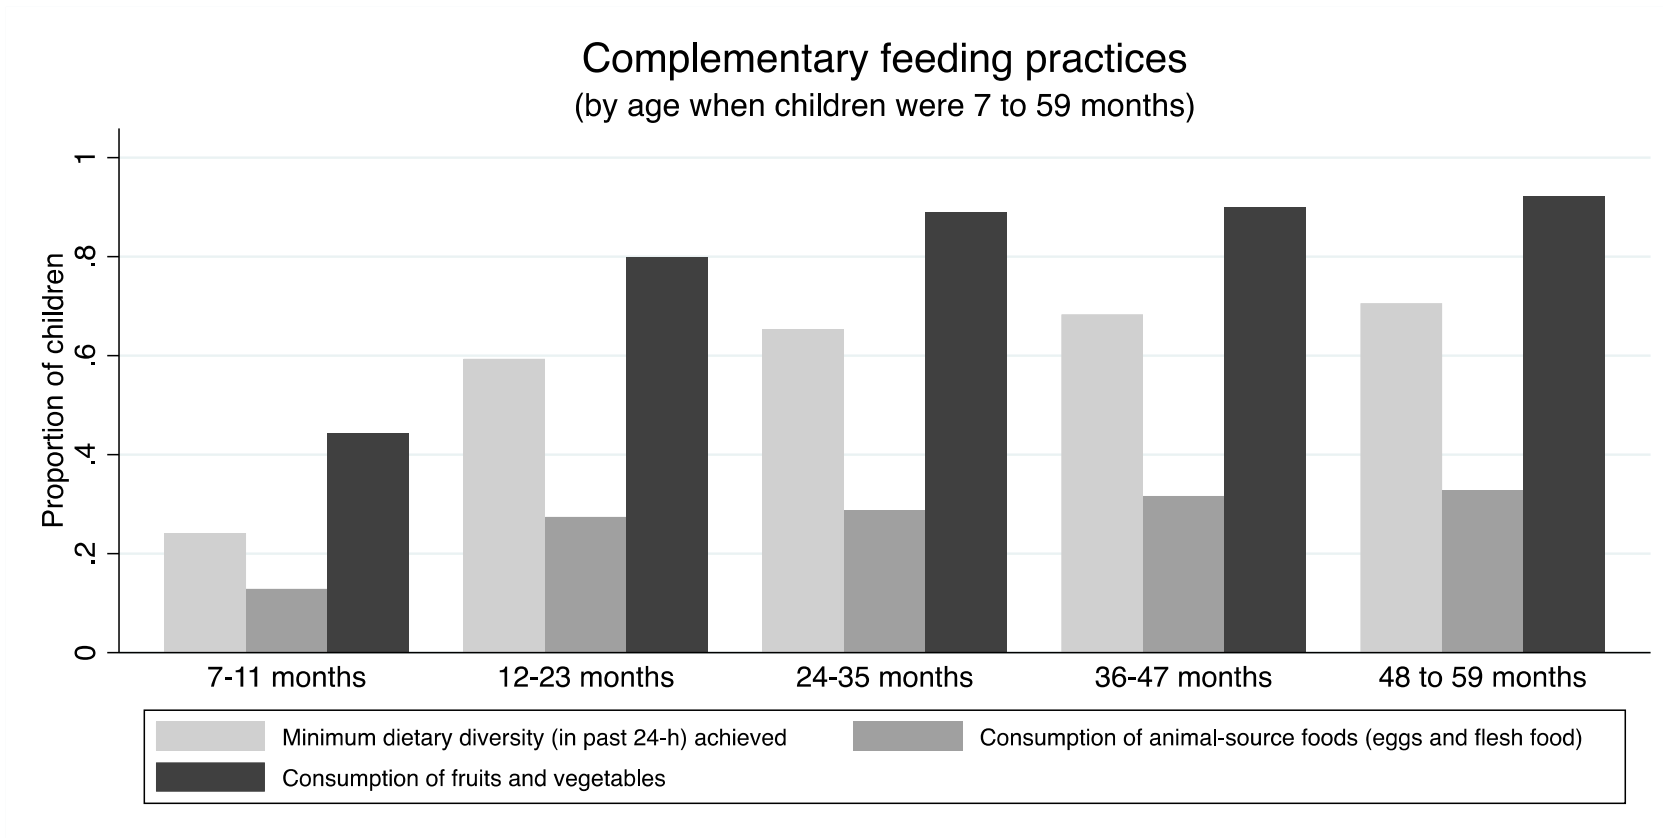

**Supplementary figure 3:** Complementary feeding practices in the past 24-hours by age when children were 7 to 59 months

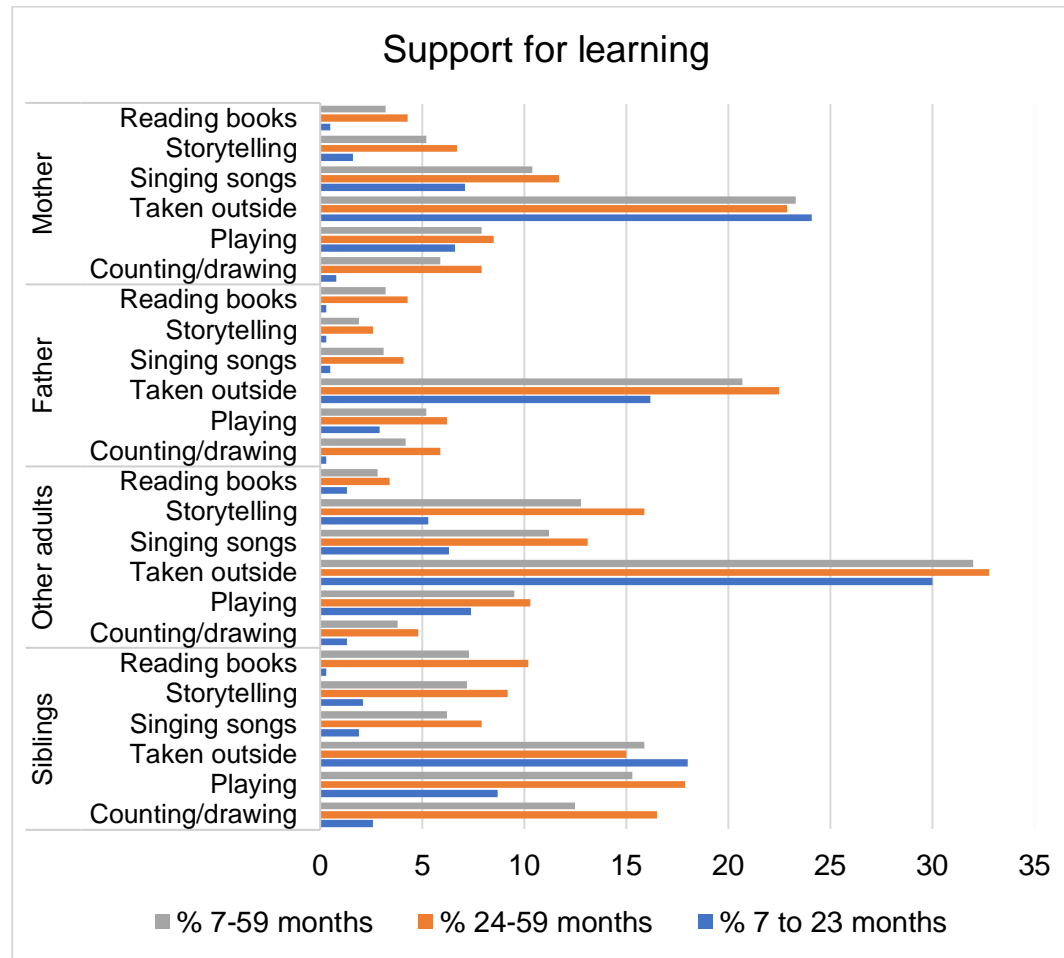

**Supplementary figure 4:** Percentage of children aged 7 to 59 months who experienced types of learning activities with different caregivers  
 \*other adults refers to maternal and paternal grandparents.

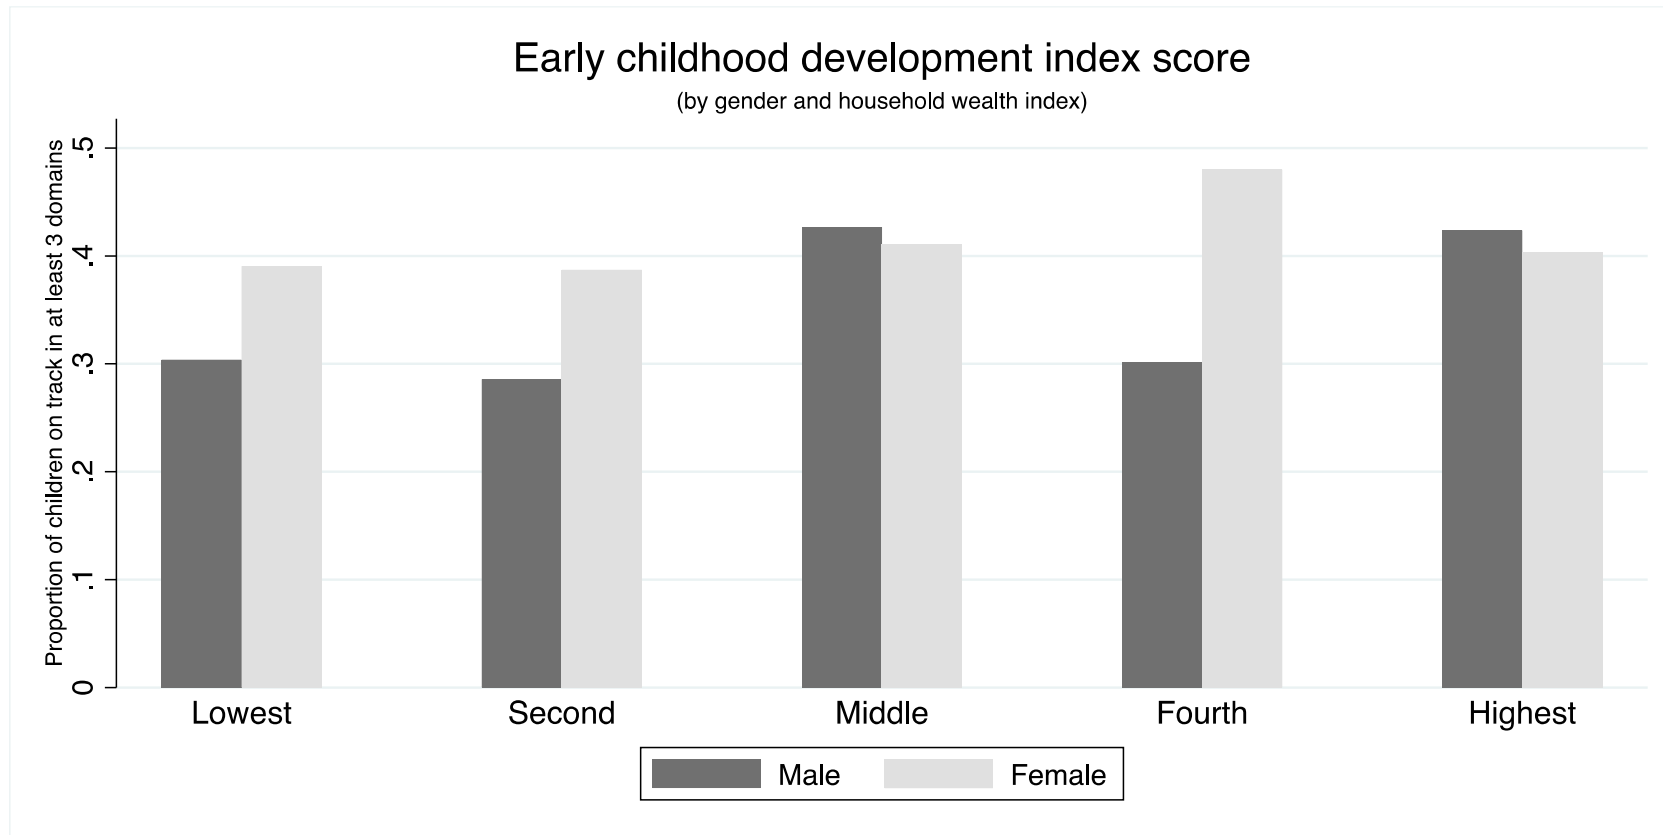

**Supplementary figure 5:** Early childhood index score by gender and wealth index when children were 36 -59 months
