# Supplementary material for: Feeding, caregiving practices, and developmental delay among children under five in lowland Nepal: a community-based cross-sectional survey
Source: Springer Nature journal article supplement (doi:10.1186/s12889-022-13776-8), 2022-09-10
Supplement: MOESM2 [file 23474036]

**Supplementary table 1: A summary of indicators available from each of 6-week questionnaire and the follow-up survey sample**

| <b>6-week questionnaire<br/>(21 February 2007 - 10 July 2008)</b> |                                          | <b>Follow-up survey<br/>(16 September - 15 December 2011)</b> |                                                       |                                                            |
|-------------------------------------------------------------------|------------------------------------------|---------------------------------------------------------------|-------------------------------------------------------|------------------------------------------------------------|
| <b>Children aged 0-12 months</b>                                  |                                          | <b>Children aged 7-59 months</b>                              |                                                       |                                                            |
| <b>Exploratory variables</b>                                      | <b>Breastfeeding indicators</b>          | <b>Exploratory variables</b>                                  | <b>Complementary feeding indicators</b>               | <b>Cognitive and socio-emotional caregiving indicators</b> |
| Child's age                                                       | Ever breastfed                           | Child's age                                                   | Minimum dietary diversity in last 24 hours            | Access to three or more children's books                   |
| Wealth index                                                      | Timing of breastfeeding Initiation       | Child's Sex                                                   | Consumption of any animal foods in last 24 hours      | Access to two or more toys                                 |
| Months of Adequate Household Food Provisioning (MAHFP)            | Exclusive breastfeeding in past 24 hours |                                                               | Consumption of fruits and vegetables in last 24 hours | Adequate supervision                                       |
| Migration of any household member                                 | Colostrum feeding                        |                                                               |                                                       | Stimulation by mother, father, or other adult              |
| Household size                                                    | No pre-lacteal feeding                   |                                                               |                                                       | Attendance of early childhood education                    |
| Access to health care services                                    |                                          |                                                               |                                                       | Early Childhood Development Index scores                   |
| Ethnicity                                                         |                                          |                                                               |                                                       |                                                            |
| Religion                                                          |                                          |                                                               |                                                       |                                                            |
| Mother's age                                                      |                                          |                                                               |                                                       |                                                            |
| Mother's education                                                |                                          |                                                               |                                                       |                                                            |
| Father's education                                                |                                          |                                                               |                                                       |                                                            |
| Parity                                                            |                                          |                                                               |                                                       |                                                            |
| Antenatal visits                                                  |                                          |                                                               |                                                       |                                                            |
| Place of delivery                                                 |                                          |                                                               |                                                       |                                                            |
