# Supplementary material for: Feeding, caregiving practices, and developmental delay among children under five in lowland Nepal: a community-based cross-sectional survey
Source: Springer Nature journal article supplement (doi:10.1186/s12889-022-13776-8), 2022-09-10
Supplement: MOESM3 [file 23474036]

**Supplementary table 2: The timing of the data collection for each of the IYCF indicators and the age range**

| Year                                    | WHO indicator                                              | WHO definition                                                                                                                 | Suggested age group for WHO indicator | Indicator used in our study                                                                                                                | Time in the life course in our study                         | Age group suggested to sample for WHO indicators | Age group sampled in our study                                 | n in the 6-week questionnaire of children aged 0-12 months | n in follow up survey of children aged 7 to 59 months |
|-----------------------------------------|------------------------------------------------------------|--------------------------------------------------------------------------------------------------------------------------------|---------------------------------------|--------------------------------------------------------------------------------------------------------------------------------------------|--------------------------------------------------------------|--------------------------------------------------|----------------------------------------------------------------|------------------------------------------------------------|-------------------------------------------------------|
| <b>BREASTFEEDING INDICATORS</b>         |                                                            |                                                                                                                                |                                       |                                                                                                                                            |                                                              |                                                  |                                                                |                                                            |                                                       |
| 2021                                    | Ever breastfed                                             | Percentage of children born in the last 24 months who were ever breastfed                                                      | Children born in the last 24 months   | Ever breastfed                                                                                                                             | First 24 months but we have recall from first 6 weeks mostly | 0 to 23 months                                   | 0 to 12 months (median age 46 days)                            | 1358                                                       |                                                       |
| 2021                                    | Early initiation of breastfeeding                          | Percentage of children born in the last 24 months who were put to the breast within one hour of birth                          | Children born in the last 24 months   | Detailed timing of breastfeeding initiation                                                                                                | First 3 days of life                                         |                                                  |                                                                | 1358                                                       |                                                       |
|                                         |                                                            |                                                                                                                                |                                       | Colostrum feeding                                                                                                                          |                                                              |                                                  |                                                                | 1343                                                       |                                                       |
|                                         |                                                            |                                                                                                                                |                                       | Pre-lacteal feeding                                                                                                                        |                                                              |                                                  |                                                                | 1342                                                       |                                                       |
| 2021                                    | Exclusively breastfed for the first two days after birth   | Percentage of children born in the last 24 months who were fed exclusively with breast milk for the first two days after birth | Children born in the last 24 months   | Exclusive breastfeeding for last 24 hours amongst children birth to 182 days at interview                                                  | Up to 6 months                                               |                                                  | 0 to 5 months (median age 45 days)                             | 1313                                                       |                                                       |
|                                         |                                                            |                                                                                                                                |                                       |                                                                                                                                            |                                                              | 0 to 5 months                                    |                                                                |                                                            |                                                       |
| <b>COMPLEMENTARY FEEDING INDICATORS</b> |                                                            |                                                                                                                                |                                       |                                                                                                                                            |                                                              |                                                  |                                                                |                                                            |                                                       |
| 2021                                    | Introduction of solid, semi-solid or soft foods 6–8 months | Percentage of infants 6–8 months of age who consumed solid, semi-solid or soft foods during the previous day                   | Children 6–23 months of age           | Percentage of children group who were introduced solid-semi-solid or soft foods between 6-to-8-month age (recall for all children sampled) | 6 months up to 1 year                                        | 6 to 23 months                                   | 7 to 59 months (ALL recalling the past) (median age 38 months) |                                                            | 1313                                                  |

| Year | WHO indicator                                   | WHO definition                                                                                                                                         | Suggested age group for WHO indicator | Indicator used in our study                                               | Time in the life course in our study           | Age group suggested to sample for WHO indicators | Age group sampled in our study        | n in the 6-week questionnaire of children aged 0-12 months | n in follow up survey of children aged 7 to 59 months |
|------|-------------------------------------------------|--------------------------------------------------------------------------------------------------------------------------------------------------------|---------------------------------------|---------------------------------------------------------------------------|------------------------------------------------|--------------------------------------------------|---------------------------------------|------------------------------------------------------------|-------------------------------------------------------|
| 2008 | Minimum dietary diversity 6–23 months           | Percentage of children 6–23 months of age who consumed foods and beverages from at least four out of seven defined food groups during the previous day | Children 6–23 months of age           | Minimum dietary diversity achieved for children during the previous day   | 6 to 23 months but we have data 7 to 59 months | 6 to 23 months                                   | 7 to 59 months (median age 38 months) |                                                            | 1352                                                  |
| 2021 | Egg and/or flesh food consumption 6–23 months   | Percentage of children 6–23 months of age who consumed egg and/or flesh food during the previous day                                                   | Children 6–23 months of age           | Consumption of animal foods (eggs and flesh food) during the previous day |                                                | 6 to 23 months                                   |                                       |                                                            | 1336                                                  |
| 2021 | Zero vegetable or fruit consumption 6–23 months | Percentage of children 6–23 months of age who did not consume any vegetables or fruits during the previous day                                         | Children 6–23 months of age           | Consumption of any fruits and vegetables during the previous day          |                                                | 6 to 23 months                                   |                                       |                                                            | 1336                                                  |
