# Supplementary material for: Feeding, caregiving practices, and developmental delay among children under five in lowland Nepal: a community-based cross-sectional survey
Source: Springer Nature journal article supplement (doi:10.1186/s12889-022-13776-8), 2022-09-10
Supplement: MOESM4 [file 23474036]

**Supplementary table 3 Definition and categorisation of potential explanatory variables used in the study**

| <b>Variable</b>                                               | <b>Variable definition</b>                                                                                                                                                 | <b>Variable type</b> | <b>Category</b>                                                                                                                       |
|---------------------------------------------------------------|----------------------------------------------------------------------------------------------------------------------------------------------------------------------------|----------------------|---------------------------------------------------------------------------------------------------------------------------------------|
| <b>Household level factors</b>                                |                                                                                                                                                                            |                      |                                                                                                                                       |
| <b>Wealth quintiles</b>                                       | Asset based wealth quintile using DHS (PCA) method. (Quintiles were generated using the first principal component: highest quintile represents the wealthiest households). | Categorical          | 1 = Lowest; 2 = Second; 3 = Middle; 4 = Fourth; 5 = Highest                                                                           |
| <b>Months of Adequate Household Food Provisioning (MAHFP)</b> | The food security in the 12-month period before main surveillance                                                                                                          | Categorical          | 1 = For up to 7 months; 2 = For 8 to 11 months; 3 = For 12 months                                                                     |
| <b>Migration of at least one household member</b>             | Migration of any household member outside the country                                                                                                                      | Binary               | 1 = Yes; 0 = No                                                                                                                       |
| <b>Household size</b>                                         | Number of people (adults and children) residing in the same HH grouped into categories                                                                                     | Categorical          | 1 = 1-5 members; 2 = 6-10 members; 3 = $\geq 11$ members                                                                              |
| <b>Access to health care services</b>                         | Child was seen/taken to health facility during the recall period                                                                                                           | Binary               | 1= Has access; 0 = Does not have access                                                                                               |
| <b>Caste group</b>                                            | Caste groups based on the socioeconomic status                                                                                                                             | Categorical          | 1 = Dalit/Muslim (most disadvantaged group); 2 = Janajati/other terai cast (Sudi/Teli); 3 = Yadav/Brahmin (least disadvantaged group) |
| <b>Religion</b>                                               | Religion of the household                                                                                                                                                  | Binary               | 0 = Hindu; 1 = non-Hindu (mostly Muslims)                                                                                             |
| <b>Parent level factors</b>                                   |                                                                                                                                                                            |                      |                                                                                                                                       |
| <b>Mother's age</b>                                           | Mothers age during the follow-up survey                                                                                                                                    | Categorical          | 1 = 15-24; 2 = 25-34; 3 = 5- 45 years                                                                                                 |
| <b>Mother's education</b>                                     | Education level of the child's mother                                                                                                                                      | Categorical          | 0 = Never went to school; 1 = Primary; 2 = Secondary and above                                                                        |
| <b>Mother's literacy</b>                                      | Maternal reading ability                                                                                                                                                   | Binary               | 1 = Can read easily; 0 = Cannot read or with some difficulty                                                                          |
| <b>Father's education</b>                                     | Education level of the child's mother                                                                                                                                      | Categorical.         | 0 = Never went to school; 1 = Primary; 2 = Secondary and above                                                                        |

|                                         |                                                                                                          |             |                                                                                            |
|-----------------------------------------|----------------------------------------------------------------------------------------------------------|-------------|--------------------------------------------------------------------------------------------|
| <b>Parity</b>                           | Total number previous live births and stillbirths including the index child                              | Categorical | 1 = One; 2 = Two; 3 = Three; 4 = Four or more                                              |
| <b>Antenatal visits</b>                 | Total number of antenatal checkups by health professional                                                | Categorical | 0 = None; 1 = 1-3 visits; 2 = 4+                                                           |
| <b>Place of delivery</b>                | Place of the delivery                                                                                    | Binary      | 0 = Home; 1 = Health facility                                                              |
| <b>Child level factors</b>              |                                                                                                          |             |                                                                                            |
| <b>Age in days at 6-week interview</b>  | Collected in the post-neonatal period when the index child was median 46 days old.                       | Categorical | 1 = <46 days; 2 = 46-91 days; 3 = 92-182 days (3-5 months); 4 = 183-366 days (6-12 months) |
| <b>Age in months at follow-up study</b> | Collected in the follow-up cross-sectional survey questionnaire when the child was median age 38 months. | Categorical | 1 = 7-11 months; 2 = 12-23 months; 3 = 24-35 months; 4 = 36-37 months; 5 = 48-59 months    |
| <b>Sex</b>                              | Sex of the child                                                                                         | Binary      | 1 = Female; 0 = Male                                                                       |
