# Supplementary material for: Feeding, caregiving practices, and developmental delay among children under five in lowland Nepal: a community-based cross-sectional survey
Source: Springer Nature journal article supplement (doi:10.1186/s12889-022-13776-8), 2022-09-10
Supplement: MOESM5 [file 23474036]

**Supplementary table 4: Multivariable logistic regression analysis of factors associated with timely initiation of breastfeeding (recall of the first days of life) among children aged 0-12 months**

| Indicators                                   | Initiated breastfeeding within one hour (N=215) n (%) | Initiated breastfeeding after one hour (N=1135) n (%) | Unadjusted OR (95% CI)   | p value      | Model 1 AOR (95% CI)     | p value      | Model 2 AOR (95% CI)     | p value      | Model 3 AOR (95% CI) | p value |
|----------------------------------------------|-------------------------------------------------------|-------------------------------------------------------|--------------------------|--------------|--------------------------|--------------|--------------------------|--------------|----------------------|---------|
| <b>HOUSEHOLD CHARACTERISTICS</b>             |                                                       |                                                       |                          |              |                          |              |                          |              |                      |         |
| Wealth Quintile                              |                                                       |                                                       |                          |              |                          |              |                          |              |                      |         |
| Lowest (ref)                                 | 29 (11.9)                                             | 215 (88.1)                                            |                          | 1            |                          | 1            |                          |              |                      |         |
| Second                                       | 37 (14.3)                                             | 221 (85.7)                                            | 1.30 (0.74, 2.26)        | 0.360        | 1.27 (0.69, 2.36)        | 0.441        |                          |              |                      |         |
| Middle                                       | 49 (16.7)                                             | 244 (83.3)                                            | 1.56 (0.92, 2.64)        | 0.097        | 1.49 (0.80, 2.78)        | 0.208        |                          |              |                      |         |
| Fourth                                       | 44 (18.1)                                             | 199 (81.9)                                            | 1.62 (0.94, 2.79)        | 0.082        | 1.41 (0.72, 2.76)        | 0.321        |                          |              |                      |         |
| Highest                                      | 48 (18.4)                                             | 213 (81.6)                                            | <b>1.79 (1.05, 3.07)</b> | <b>0.033</b> | 1.60 (0.79, 3.24)        | 0.190        |                          |              |                      |         |
| Months of adequate food provisioning (MAHFP) |                                                       |                                                       |                          |              |                          |              |                          |              |                      |         |
| For up to 7 months                           | 20 (11.7)                                             | 151 (88.3)                                            | 0.69 (0.40, 1.17)        | 0.169        | 1.00 (0.52, 1.90)        | 0.994        |                          |              |                      |         |
| For 8 to 11 months                           | 53 (17.0)                                             | 258 (83.0)                                            | 0.96 (0.65, 1.41)        | 0.833        | 1.08 (0.69, 1.71)        | 0.732        |                          |              |                      |         |
| For 12 months (ref)                          | 140 (16.2)                                            | 722 (83.8)                                            |                          | 1            |                          | 1            |                          |              |                      |         |
| Migration of at least one household member   |                                                       |                                                       |                          |              |                          |              |                          |              |                      |         |
| No (ref)                                     | 105 (16.2)                                            | 543 (83.8)                                            |                          | 1            |                          |              |                          |              |                      |         |
| Yes                                          | 109 (15.7)                                            | 584 (84.3)                                            | 0.93 (0.68, 1.27)        | 0.642        |                          |              |                          |              |                      |         |
| Household size                               |                                                       |                                                       |                          |              |                          |              |                          |              |                      |         |
| 1-5 members                                  | 45 (14.5)                                             | 266 (85.5)                                            | 0.77 (0.52, 1.34)        | 0.186        | 0.77 (0.50, 1.18)        | 0.234        |                          |              |                      |         |
| 6-10 members (ref)                           | 140 (17.4)                                            | 663 (82.6)                                            |                          | 1            |                          | 1            |                          |              |                      |         |
| >=11 members                                 | 29 (12.9)                                             | 195 (87.1)                                            | 0.70 (0.44, 1.11)        | 0.131        | 0.72 (0.44, 1.17)        | 0.184        |                          |              |                      |         |
| Healthcare access                            |                                                       |                                                       |                          |              |                          |              |                          |              |                      |         |
| No (ref)                                     | 166 (15.4)                                            | 912 (84.6)                                            |                          | 1            |                          | 1            |                          | 1            |                      |         |
| Yes                                          | 39 (22.4)                                             | 135 (77.6)                                            | <b>1.80 (1.17, 2.76)</b> | <b>0.008</b> | <b>1.85 (1.17, 2.93)</b> | <b>0.009</b> | 1.55 (0.97, 2.48)        | 0.066        |                      |         |
| Ethnicity/Caste                              |                                                       |                                                       |                          |              |                          |              |                          |              |                      |         |
| Dalit/ Muslim (ref)                          | 55 (13.1)                                             | 365 (86.9)                                            |                          | 1            |                          | 1            |                          |              |                      |         |
| Janjati/other terai caste                    | 95 (15.0)                                             | 540 (85.0)                                            | 1.11 (0.75, 1.64)        | 0.599        | 0.88 (0.53, 1.46)        | 0.621        |                          |              |                      |         |
| Yadav/ Brahmin                               | 65 (22.0)                                             | 230 (78.0)                                            | <b>1.79 (1.16, 2.76)</b> | <b>0.009</b> | 1.42 (0.80, 2.53)        | 0.235        |                          |              |                      |         |
| Religion                                     |                                                       |                                                       |                          |              |                          |              |                          |              |                      |         |
| Non-Hindu                                    | 17 (10.8)                                             | 141 (89.2)                                            | 0.67 (0.38, 1.17)        | 0.158        | 0.69 (0.33, 1.41)        | 0.305        |                          |              |                      |         |
| Hindu (ref)                                  | 198 (16.6)                                            | 994 (83.4)                                            |                          | 1            |                          | 1            |                          |              |                      |         |
| <b>PARENTAL CHARACTERISTICS</b>              |                                                       |                                                       |                          |              |                          |              |                          |              |                      |         |
| Maternal age                                 |                                                       |                                                       |                          |              |                          |              |                          |              |                      |         |
| 15-24 years (ref)                            | 82 (15.8)                                             | 436 (84.2)                                            |                          | 1            |                          |              |                          | 1            |                      | 1       |
| 25-34 years                                  | 117 (16.0)                                            | 614 (84.0)                                            | 1.01 (0.72, 1.40)        | 0.968        |                          |              | 0.84 (0.49, 1.42)        | 0.508        | 0.88 (0.53, 1.46)    | 0.617   |
| 35-45 years                                  | 16 (16.0)                                             | 84 (84.0)                                             | 1.01 (0.54, 1.89)        | 0.977        |                          |              | 0.66 (0.27, 1.60)        | 0.358        | 0.61 (0.26, 1.43)    | 0.252   |
| No of previous pregnancies                   |                                                       |                                                       |                          |              |                          |              |                          |              |                      |         |
| One (ref)                                    | 63 (14.7)                                             | 366 (85.3)                                            |                          | 1            |                          |              |                          | 1            |                      | 1       |
| Two                                          | 68 (18.5)                                             | 299 (81.5)                                            | 1.23 (0.82, 1.84)        | 0.324        |                          |              | <b>1.76 (1.04, 3.00)</b> | <b>0.037</b> | 1.67 (1.00, 2.79)    | 0.050   |
| Three                                        | 30 (11.7)                                             | 227 (88.3)                                            | 0.76 (0.46, 1.24)        | 0.267        |                          |              | 1.46 (0.72, 2.94)        | 0.293        | 1.30 (0.67, 2.55)    | 0.439   |

| Indicators                   | Initiated breastfeeding within one hour (N=215) n (%) | Initiated breastfeeding after one hour (N=1135) n (%) | Unadjusted OR (95% CI)   | p value          | Model 1 AOR (95% CI) | p value | Model 2 AOR (95% CI)     | p value          | Model 3 AOR (95% CI)     | p value          |
|------------------------------|-------------------------------------------------------|-------------------------------------------------------|--------------------------|------------------|----------------------|---------|--------------------------|------------------|--------------------------|------------------|
| Four or more                 | 54 (18.2)                                             | 242 (81.8)                                            | 1.41 (0.92, 2.15)        | 0.116            |                      |         | <b>2.71 (1.33, 5.52)</b> | <b>0.006</b>     | <b>2.66 (1.35, 5.23)</b> | <b>0.005</b>     |
| Maternal education           |                                                       |                                                       |                          |                  |                      |         |                          |                  |                          |                  |
| Never went to school (ref)   | 172 (15.7)                                            | 922 (84.3)                                            |                          | 1                |                      |         | 1                        |                  | 1                        |                  |
| Primary                      | 20 (20.2)                                             | 79 (79.8)                                             | 1.22 (0.70, 2.13)        | 0.479            |                      |         | 1.26 (0.68, 2.33)        | 0.460            | 1.19 (0.66, 2.16)        | 0.561            |
| Secondary or above           | 23 (14.6)                                             | 134 (85.4)                                            | 0.91 (0.55, 1.50)        | 0.708            |                      |         | 1.00 (0.58, 1.73)        | 0.991            | 0.98 (0.58, 1.66)        | 0.951            |
| Father's education           |                                                       |                                                       |                          |                  |                      |         |                          |                  |                          |                  |
| Never went to school (ref)   | 134 (15.5)                                            | 730 (84.5)                                            |                          | 1                |                      |         |                          |                  |                          |                  |
| Primary                      | 23 (14.5)                                             | 136 (85.5)                                            | 0.98 (0.59, 1.63)        | 0.931            |                      |         |                          |                  |                          |                  |
| Secondary or above           | 58 (17.7)                                             | 269 (82.3)                                            | 1.18 (0.82, 1.70)        | 0.370            |                      |         |                          |                  |                          |                  |
| Antenatal visits             |                                                       |                                                       |                          |                  |                      |         |                          |                  |                          |                  |
| None (ref)                   | 59 (13.6)                                             | 374 (86.4)                                            |                          | 1                |                      |         | 1                        |                  |                          |                  |
| 1-3 visits                   | 97 (15.2)                                             | 542 (84.8)                                            | 1.08 (0.74, 1.57)        | 0.703            |                      |         | 1.05 (0.69, 1.61)        | 0.805            |                          |                  |
| 4+ visits                    | 59 (21.2)                                             | 219 (78.8)                                            | <b>1.63 (1.06, 2.50)</b> | <b>0.025</b>     |                      |         | 1.12 (0.67, 1.86)        | 0.674            |                          |                  |
| Place of delivery            |                                                       |                                                       |                          |                  |                      |         |                          |                  |                          |                  |
| Home (ref)                   | 123 (11.9)                                            | 914 (88.1)                                            |                          | 1                |                      |         | 1                        |                  | 1                        |                  |
| Health facility              | 88 (30.7)                                             | 199 (69.3)                                            | <b>3.85 (2.69, 5.51)</b> | <b>&lt;0.001</b> |                      |         | <b>4.51 (2.99, 6.81)</b> | <b>&lt;0.001</b> | <b>4.53 (3.09, 6.65)</b> | <b>&lt;0.001</b> |
| <b>CHILD CHARACTERISTICS</b> |                                                       |                                                       |                          |                  |                      |         |                          |                  |                          |                  |
| Child sex                    |                                                       |                                                       |                          |                  |                      |         |                          |                  |                          |                  |
| Male (ref)                   | 116 (16.2)                                            | 599 (83.8)                                            |                          | 1                |                      | 1       | 1                        |                  | 1                        |                  |
| Female                       | 99 (15.6)                                             | 536 (84.4)                                            | 0.97 (0.71, 1.33)        | 0.860            | 1.04 (0.74, 1.46)    | 0.825   | 0.98 (0.69, 1.38)        | 0.894            | 0.98 (0.71, 1.37)        | 0.923            |
| Child age at recall          | <b>(Median, IQR)</b>                                  | <b>(Median, IQR)</b>                                  |                          |                  |                      |         |                          |                  |                          |                  |
| Age in months                | 1.5 (1.1-2.1)                                         | 1.5 (1.1-2.2)                                         | <b>0.86 (0.76, 0.98)</b> | <b>0.021</b>     | 0.88 (0.77, 1.00)    | 0.051   | <b>0.84 (0.74, 0.97)</b> | <b>0.015</b>     | <b>0.85 (0.75, 0.98)</b> | <b>0.020</b>     |

For interpretation purposes, OR >1 indicates children are more likely to be breastfed within an hour of birth and OR <1 indicates children are less likely.

Model 1 (N= 1196) included child sex, trial allocation as a priori covariates plus wealth quintile, MAHFP, HH size, health care access, ethnicity, and religion from unadjusted analysis with a p<0.2.

Model 2 (N=1226) included maternal age, maternal education, child sex, trial allocation as a priori covariates plus parity, antenatal visits, place of delivery from unadjusted analysis with a p<0.2. plus, health care access from Model 1 with p<0.05.

Model 3 (N=1322) included maternal age, maternal education, child sex, trial allocation as a priori covariates plus parity and place of delivery from Model 2 with p<0.05.

Abbreviation: OR Odds Ratio, AOR Adjusted Odds Ratio, IQR Interquartile range

**Supplementary table 5: Multivariable logistic regression analysis of factors associated with colostrum feeding (recall of the first days of life) among children aged 0-12 months**

| Indicators                                   | Colostrum fed<br>(N=894)<br>n (%) | Colostrum not fed<br>(N=449)<br>n (%) | Unadjusted<br>OR (95% CI) | p value          | Model 1<br>AOR (95% CI)  | p value      | Model 2<br>AOR (95% CI)  | p value      | Model 3<br>AOR (95% CI)  | p value      |
|----------------------------------------------|-----------------------------------|---------------------------------------|---------------------------|------------------|--------------------------|--------------|--------------------------|--------------|--------------------------|--------------|
| <b>HOUSEHOLD CHARACTERISTICS</b>             |                                   |                                       |                           |                  |                          |              |                          |              |                          |              |
| Wealth Quintile                              |                                   |                                       |                           |                  |                          |              |                          |              |                          |              |
| Lowest (ref)                                 | 138 (56.3)                        | 107 (43.7)                            |                           | 1                |                          | 1            |                          | 1            |                          | 1            |
| Second                                       | 165 (64.0)                        | 93 (36.0)                             | 1.35 (0.92, 1.99)         | 0.121            | 1.30 (0.87, 1.94)        | 0.202        | 1.20 (0.81, 1.79)        | 0.360        | 1.20 (0.81, 1.78)        | 0.354        |
| Middle                                       | 195 (67.2)                        | 95 (32.8)                             | <b>1.68 (1.16, 2.45)</b>  | <b>0.006</b>     | <b>1.58 (1.05, 2.37)</b> | <b>0.029</b> | 1.42 (0.96, 2.10)        | 0.075        | 1.45 (0.98, 2.13)        | 0.062        |
| Fourth                                       | 174 (73.1)                        | 64 (26.9)                             | <b>2.08 (1.39, 3.13)</b>  | <b>&lt;0.001</b> | <b>1.88 (1.19, 2.97)</b> | <b>0.006</b> | <b>1.70 (1.10, 2.61)</b> | <b>0.017</b> | <b>1.69 (1.10, 2.60)</b> | <b>0.016</b> |
| Highest                                      | 188 (72.0)                        | 73 (28.0)                             | <b>2.13 (1.43, 3.17)</b>  | <b>&lt;0.001</b> | <b>2.02 (1.27, 3.22)</b> | <b>0.003</b> | 1.44 (0.93, 2.24)        | 0.106        | 1.44 (0.93, 2.22)        | 0.103        |
| Months of adequate food provisioning (MAHFP) |                                   |                                       |                           |                  |                          |              |                          |              |                          |              |
| For up to 7 months                           | 97 (57.1)                         | 73 (42.9)                             | <b>0.60 (0.41, 0.87)</b>  | <b>0.007</b>     | 0.90 (0.58, 1.40)        | 0.648        |                          |              |                          |              |
| For 8 to 11 months                           | 193 (62.3)                        | 117 (37.7)                            | <b>0.67 (0.50, 0.90)</b>  | <b>0.009</b>     | 0.85 (0.61, 1.20)        | 0.356        |                          |              |                          |              |
| For 12 months (ref)                          | 600 (70.0)                        | 257 (30.0)                            |                           | 1                |                          | 1            |                          |              |                          |              |
| Migration of at least one household member   |                                   |                                       |                           |                  |                          |              |                          |              |                          |              |
| No (ref)                                     | 427 (65.9)                        | 221 (34.1)                            |                           | 1                |                          |              |                          |              |                          |              |
| Yes                                          | 462 (67.2)                        | 225 (32.8)                            | 1.05 (0.82, 1.33)         | 0.722            |                          |              |                          |              |                          |              |
| Household size                               |                                   |                                       |                           |                  |                          |              |                          |              |                          |              |
| 1-5 members                                  | 208 (67.1)                        | 102 (32.9)                            | 0.98 (0.73, 1.32)         | 0.894            |                          |              |                          |              |                          |              |
| 6-10 members (ref)                           | 539 (67.3)                        | 262 (32.7)                            |                           | 1                |                          |              |                          |              |                          |              |
| >=11 members                                 | 140 (63.1)                        | 82 (36.9)                             | 0.89 (0.64, 1.24)         | 0.479            |                          |              |                          |              |                          |              |
| Healthcare access                            |                                   |                                       |                           |                  |                          |              |                          |              |                          |              |
| No (ref)                                     | 711 (66.2)                        | 363 (33.8)                            |                           | 1                |                          |              |                          |              |                          |              |
| Yes                                          | 118 (67.8)                        | 56 (32.2)                             | 1.12 (0.78, 1.62)         | 0.531            |                          |              |                          |              |                          |              |
| Ethnicity/Caste                              |                                   |                                       |                           |                  |                          |              |                          |              |                          |              |
| Dalit/ Muslim (ref)                          | 276 (66.3)                        | 140 (33.7)                            |                           | 1                |                          |              |                          |              |                          |              |
| Janjati/other terai caste                    | 410 (64.5)                        | 226 (35.5)                            | 0.91 (0.69, 1.21)         | 0.531            |                          |              |                          |              |                          |              |
| Yadav/ Brahmin                               | 208 (71.5)                        | 83 (28.5)                             | 1.19 (0.83, 1.70)         | 0.335            |                          |              |                          |              |                          |              |
| Religion                                     |                                   |                                       |                           |                  |                          |              |                          |              |                          |              |
| Non-Hindu                                    | 101 (65.2)                        | 54 (34.8)                             | 1.00 (0.68, 1.47)         | 0.983            |                          |              |                          |              |                          |              |
| Hindu (ref)                                  | 793 (66.8)                        | 395 (33.2)                            |                           | 1                |                          |              |                          |              |                          |              |
| <b>PARENTAL CHARACTERISTICS</b>              |                                   |                                       |                           |                  |                          |              |                          |              |                          |              |
| Maternal age                                 |                                   |                                       |                           |                  |                          |              |                          |              |                          |              |
| 15-24 years (ref)                            | 354 (68.5)                        | 163 (31.5)                            |                           | 1                |                          |              |                          | 1            |                          | 1            |
| 25-34 years                                  | 477 (65.7)                        | 249 (34.3)                            | 0.90 (0.69, 1.16)         | 0.400            |                          |              | 0.96 (0.65, 1.42)        | 0.842        | 1.02 (0.78, 1.35)        | 0.870        |
| 35-45 years                                  | 62 (62.6)                         | 37 (37.4)                             | 0.79 (0.49, 1.28)         | 0.340            |                          |              | 0.86 (0.44, 1.67)        | 0.659        | 1.05 (0.63, 1.76)        | 0.858        |
| No of previous pregnancies                   |                                   |                                       |                           |                  |                          |              |                          |              |                          |              |
| One (ref)                                    | 298 (69.8)                        | 129 (30.2)                            |                           | 1                |                          |              |                          | 1            |                          | 1            |
| Two                                          | 240 (65.9)                        | 124 (34.1)                            | 0.90 (0.65, 1.23)         | 0.500            |                          |              | 1.05 (0.71, 1.56)        | 0.808        |                          |              |
| Three                                        | 161 (62.9)                        | 95 (37.1)                             | 0.74 (0.52, 1.04)         | 0.083            |                          |              | 1.00 (0.61, 1.62)        | 0.989        |                          |              |
| Four or more                                 | 194 (65.8)                        | 101 (34.2)                            | 0.88 (0.63, 1.23)         | 0.449            |                          |              | 1.28 (0.76, 2.16)        | 0.342        |                          |              |

| Indicators                   | Colostrum fed<br>(N=894)<br>n (%)     | Colostrum not fed<br>(N=449)<br>n (%) | Unadjusted OR (95% CI)   | p value          | Model 1 AOR (95% CI)     | p value      | Model 2 AOR (95% CI)     | p value          | Model 3 AOR (95% CI)     | p value          |
|------------------------------|---------------------------------------|---------------------------------------|--------------------------|------------------|--------------------------|--------------|--------------------------|------------------|--------------------------|------------------|
| <b>Maternal education</b>    |                                       |                                       |                          |                  |                          |              |                          |                  |                          |                  |
| Never went to school (ref)   | 707 (65.0)                            | 381 (35.0)                            | 1                        |                  |                          |              | 1                        |                  | 1                        |                  |
| Primary                      | 70 (71.4)                             | 28 (28.6)                             | 1.48 (0.91, 2.41)        | 0.112            |                          |              | 1.33 (0.79, 2.21)        | 0.281            | 1.30 (0.78, 2.17)        | 0.316            |
| Secondary or above           | 117 (74.5)                            | 40 (25.5)                             | <b>1.64 (1.10, 2.46)</b> | <b>0.015</b>     |                          |              | 1.39 (0.89, 2.18)        | 0.151            | 1.41 (0.90, 2.20)        | 0.134            |
| <b>Father's education</b>    |                                       |                                       |                          |                  |                          |              |                          |                  |                          |                  |
| Never went to school (ref)   | 570 (66.2)                            | 291 (33.8)                            | 1                        |                  |                          |              |                          |                  |                          |                  |
| Primary                      | 106 (66.7)                            | 53 (33.3)                             | 1.01 (0.69, 1.48)        | 0.963            |                          |              |                          |                  |                          |                  |
| Secondary or above           | 218 (67.5)                            | 105 (32.5)                            | 1.06 (0.79, 1.42)        | 0.699            |                          |              |                          |                  |                          |                  |
| <b>Antenatal visits</b>      |                                       |                                       |                          |                  |                          |              |                          |                  |                          |                  |
| None (ref)                   | 265 (61.2)                            | 168 (38.8)                            | 1                        |                  |                          |              | 1                        |                  |                          |                  |
| 1-3 visits                   | 436 (68.4)                            | 201 (31.6)                            | <b>1.37 (1.04, 1.80)</b> | <b>0.026</b>     |                          |              | 1.23 (0.91, 1.66)        | 0.173            |                          |                  |
| 4+ visits                    | 193 (70.7)                            | 80 (29.3)                             | <b>1.48 (1.04, 2.10)</b> | <b>0.027</b>     |                          |              | 1.00 (0.67, 1.49)        | 0.992            |                          |                  |
| <b>Place of delivery</b>     |                                       |                                       |                          |                  |                          |              |                          |                  |                          |                  |
| Home (ref)                   | 643 (62.3)                            | 389 (37.7)                            | 1                        |                  |                          |              | 1                        |                  | 1                        |                  |
| Health facility              | 233 (81.5)                            | 53 (18.5)                             | <b>2.79 (1.98, 3.95)</b> | <b>&lt;0.001</b> |                          |              | <b>2.76 (1.88, 4.06)</b> | <b>&lt;0.001</b> | <b>2.68 (1.85, 3.88)</b> | <b>&lt;0.001</b> |
| <b>CHILD CHARACTERISTICS</b> |                                       |                                       |                          |                  |                          |              |                          |                  |                          |                  |
| <b>Child sex</b>             |                                       |                                       |                          |                  |                          |              |                          |                  |                          |                  |
| Male (ref)                   | 468 (65.7)                            | 244 (34.3)                            | 1                        |                  |                          | 1            | 1                        |                  | 1                        |                  |
| Female                       | 426 (67.5)                            | 205 (32.5)                            | 1.09 (0.85, 1.39)        | 0.491            | 1.10 (0.85, 1.42)        | 0.466        | 1.10 (0.85, 1.42)        | 0.475            | 1.10 (0.85, 1.42)        | 0.483            |
| <b>Child age at recall</b>   |                                       |                                       |                          |                  |                          |              |                          |                  |                          |                  |
| Age in months                | <b>(Median, IQR)</b><br>1.5 (1.1-2.1) | <b>(Median, IQR)</b><br>1.6 (1.1-2.4) | 0.93 (0.86, 1.01)        | 0.075            | <b>0.92 (0.85, 1.00)</b> | <b>0.048</b> | <b>0.92 (0.84, 1.00)</b> | <b>0.045</b>     | <b>0.92 (0.84, 1.00)</b> | <b>0.038</b>     |

For interpretation purposes, OR >1 indicates children are more likely to be fed colostrum and OR <1 indicates children are less likely.

Model 1 (N= 1287) included child sex, trial allocation as a priori covariates plus wealth, MAHFP from unadjusted analysis with a p<0.2.

Model 2 (N=1268) included maternal age, maternal education, child sex, trial allocation as a priori covariates plus parity, antenatal visits, place of delivery from unadjusted analysis with a p<0.2 plus, wealth from Model 1 with p<0.05.

Model 3 (N=1268) included maternal age, maternal education, child sex, trial allocation as a priori covariates plus wealth, place of delivery from Model 2 with p<0.05.

Abbreviation: OR Odds Ratio, AOR Adjusted Odds Ratio, IQR Interquartile range

**Supplementary table 6: Multivariable logistic regression analysis of factors associated with no pre-lacteal feeding (recall of the first days of life) among children aged 0-12 months**

| Indicators                                   | Yes - no pre-lacteal feeding (N=715) n (%) | No - pre-lacteal feeding (N=627) n (%) | Unadjusted OR (95% CI)   | p value      | Model 1 AOR (95% CI) | p value | Model 2 AOR (95% CI)     | p value      | Model 3 AOR (95% CI)     | p value      |
|----------------------------------------------|--------------------------------------------|----------------------------------------|--------------------------|--------------|----------------------|---------|--------------------------|--------------|--------------------------|--------------|
| <b>HOUSEHOLD CHARACTERISTICS</b>             |                                            |                                        |                          |              |                      |         |                          |              |                          |              |
| Wealth Quintile                              |                                            |                                        |                          |              |                      |         |                          |              |                          |              |
| Lowest (ref)                                 | 122 (50.6)                                 | 119 (49.4)                             |                          | 1            |                      | 1       |                          |              |                          |              |
| Second                                       | 125 (48.4)                                 | 133 (51.6)                             | 0.92 (0.64, 1.34)        | 0.676        | 0.88 (0.60, 1.30)    | 0.533   |                          |              |                          |              |
| Middle                                       | 159 (54.6)                                 | 132 (45.4)                             | 1.19 (0.83, 1.71)        | 0.347        | 1.12 (0.76, 1.66)    | 0.573   |                          |              |                          |              |
| Fourth                                       | 125 (51.5)                                 | 117 (48.3)                             | 1.01 (0.70, 1.48)        | 0.945        | 0.96 (0.63, 1.46)    | 0.853   |                          |              |                          |              |
| Highest                                      | 156 (59.5)                                 | 106 (40.5)                             | 1.40 (0.97, 2.04)        | 0.075        | 1.34 (0.87, 2.07)    | 0.187   |                          |              |                          |              |
| Months of adequate food provisioning (MAHFP) |                                            |                                        |                          |              |                      |         |                          |              |                          |              |
| For up to 7 months                           | 85 (50.0)                                  | 85 (50.0)                              | 0.84 (0.58, 1.19)        | 0.325        | 1.01 (0.66, 1.53)    | 0.970   |                          |              |                          |              |
| For 8 to 11 months                           | 154 (49.8)                                 | 155 (50.2)                             | 0.80 (0.61, 1.06)        | 0.128        | 0.95 (0.69, 1.30)    | 0.735   |                          |              |                          |              |
| For 12 months (ref)                          | 472 (55.1)                                 | 385 (44.9)                             |                          | 1            |                      | 1       |                          |              |                          |              |
| Migration of at least one household member   |                                            |                                        |                          |              |                      |         |                          |              |                          |              |
| No (ref)                                     | 332 (51.4)                                 | 314 (48.6)                             |                          | 1            |                      | 1       |                          |              |                          |              |
| Yes                                          | 377 (54.9)                                 | 310 (45.1)                             | 1.22 (0.97, 1.53)        | 0.091        | 1.21 (0.95, 1.53)    | 0.120   |                          |              |                          |              |
| Household size                               |                                            |                                        |                          |              |                      |         |                          |              |                          |              |
| 1-5 members                                  | 174 (56.7)                                 | 133 (43.3)                             | 1.14 (0.87, 1.51)        | 0.327        |                      |         |                          |              |                          |              |
| 6-10 members (ref)                           | 419 (52.4)                                 | 380 (47.6)                             |                          | 1            |                      |         |                          |              |                          |              |
| >=11 members                                 | 117 (52.2)                                 | 107 (47.8)                             | 1.13 (0.73, 1.36)        | 0.981        |                      |         |                          |              |                          |              |
| Healthcare access                            |                                            |                                        |                          |              |                      |         |                          |              |                          |              |
| No (ref)                                     | 562 (52.4)                                 | 510 (47.6)                             |                          | 1            |                      |         |                          |              |                          |              |
| Yes                                          | 101 (58.0)                                 | 73 (42.0)                              | 1.11 (0.78, 1.57)        | 0.557        |                      |         |                          |              |                          |              |
| Ethnicity/Caste                              |                                            |                                        |                          |              |                      |         |                          |              |                          |              |
| Dalit/ Muslim (ref)                          | 216 (51.8)                                 | 201 (48.2)                             |                          | 1            |                      |         |                          |              |                          |              |
| Janjati/other terai caste                    | 332 (52.5)                                 | 300 (47.5)                             | 0.99 (0.76, 1.30)        | 0.961        |                      |         |                          |              |                          |              |
| Yadav/ Brahmin                               | 167 (57.0)                                 | 126 (43.0)                             | 1.23 (0.89, 1.70)        | 0.213        |                      |         |                          |              |                          |              |
| Religion                                     |                                            |                                        |                          |              |                      |         |                          |              |                          |              |
| Non-Hindu                                    | 77 (48.4)                                  | 82 (51.6)                              | 0.85 (0.59, 1.21)        | 0.357        |                      |         |                          |              |                          |              |
| Hindu (ref)                                  | 638 (53.9)                                 | 545 (46.1)                             |                          | 1            |                      |         |                          |              |                          |              |
| <b>PARENTAL CHARACTERISTICS</b>              |                                            |                                        |                          |              |                      |         |                          |              |                          |              |
| Maternal age                                 |                                            |                                        |                          |              |                      |         |                          |              |                          |              |
| 15-24 years (ref)                            | 301 (58.3)                                 | 215 (41.7)                             |                          | 1            |                      |         | 1                        |              | 1                        |              |
| 25-34 years                                  | 375 (51.7)                                 | 350 (48.3)                             | <b>0.77 (0.60, 0.97)</b> | <b>0.029</b> |                      |         | 0.85 (0.60, 1.22)        | 0.390        | 0.92 (0.72, 1.19)        | 0.542        |
| 35-45 years                                  | 39 (39.0)                                  | 61 (61.0)                              | <b>0.44 (0.28, 0.70)</b> | <b>0.001</b> |                      |         | <b>0.43 (0.23, 0.79)</b> | <b>0.007</b> | <b>0.50 (0.31, 0.81)</b> | <b>0.005</b> |
| No of previous pregnancies                   |                                            |                                        |                          |              |                      |         |                          |              |                          |              |
| One (ref)                                    | 247 (57.6)                                 | 182 (42.4)                             |                          | 1            |                      |         | 1                        |              |                          |              |
| Two                                          | 199 (54.8)                                 | 164 (45.2)                             | 0.88 (0.66, 1.19)        | 0.421        |                      |         | 1.20 (0.83, 1.72)        | 0.337        |                          |              |
| Three                                        | 126 (50.2)                                 | 125 (49.8)                             | <b>0.70 (0.50, 0.97)</b> | <b>0.031</b> |                      |         | 1.03 (0.66, 1.63)        | 0.883        |                          |              |
| Four or more                                 | 143 (47.8)                                 | 156 (52.2)                             | <b>0.69 (0.51, 0.95)</b> | <b>0.021</b> |                      |         | 1.28 (0.79, 2.05)        | 0.317        |                          |              |

| Indicators                   | Yes - no pre-lacteal feeding (N=715) n (%) | No - pre-lacteal feeding (N=627) n (%) | Unadjusted OR (95% CI)   | p value          | Model 1 AOR (95% CI)     | p value      | Model 2 AOR (95% CI)     | p value          | Model 3 AOR (95% CI)     | p value          |
|------------------------------|--------------------------------------------|----------------------------------------|--------------------------|------------------|--------------------------|--------------|--------------------------|------------------|--------------------------|------------------|
| <b>Maternal education</b>    |                                            |                                        |                          |                  |                          |              |                          |                  |                          |                  |
| Never went to school (ref)   | 572 (52.6)                                 | 515 (47.4)                             | 1                        |                  |                          |              | 1                        |                  | 1                        |                  |
| Primary                      | 59 (60.2)                                  | 39 (39.8)                              | 1.38 (0.89, 2.16)        | 0.154            |                          |              | 1.23 (0.77, 1.95)        | 0.389            | 1.24 (0.78, 1.96)        | 0.366            |
| Secondary or above           | 84 (53.5)                                  | 73 (46.5)                              | 1.00 (0.71, 1.43)        | 0.978            |                          |              | 0.92 (0.63, 1.34)        | 0.667            | 0.93 (0.64, 1.35)        | 0.707            |
| <b>Father's education</b>    |                                            |                                        |                          |                  |                          |              |                          |                  |                          |                  |
| Never went to school (ref)   | 465 (54.0)                                 | 396 (46.0)                             | 1                        |                  |                          |              |                          |                  |                          |                  |
| Primary                      | 83 (53.2)                                  | 73 (46.8)                              | 1.02 (0.71, 1.46)        | 0.925            |                          |              |                          |                  |                          |                  |
| Secondary or above           | 167 (51.4)                                 | 158 (48.6)                             | 0.85 (0.65, 1.12)        | 0.248            |                          |              |                          |                  |                          |                  |
| <b>Antenatal visits</b>      |                                            |                                        |                          |                  |                          |              |                          |                  |                          |                  |
| None (ref)                   | 208 (48.4)                                 | 222 (51.6)                             | 1                        |                  |                          |              | 1                        |                  |                          |                  |
| 1-3 visits                   | 331 (52.1)                                 | 304 (47.9)                             | 1.07 (0.82, 1.39)        | 0.616            |                          |              | 0.95 (0.72, 1.25)        | 0.693            |                          |                  |
| 4+ visits                    | 176 (63.5)                                 | 101 (36.5)                             | <b>1.72 (1.24, 2.39)</b> | <b>0.001</b>     |                          |              | 1.23 (0.86, 1.77)        | 0.260            |                          |                  |
| <b>Place of delivery</b>     |                                            |                                        |                          |                  |                          |              |                          |                  |                          |                  |
| Home (ref)                   | 492 (47.7)                                 | 540 (52.3)                             | 1                        |                  |                          |              | 1                        |                  | 1                        |                  |
| Health facility              | 208 (73.0)                                 | 77 (27.0)                              | <b>2.99 (2.20, 4.06)</b> | <b>&lt;0.001</b> |                          |              | <b>2.90 (2.09, 4.03)</b> | <b>&lt;0.001</b> | <b>3.02 (2.20, 4.14)</b> | <b>&lt;0.001</b> |
| <b>CHILD CHARACTERISTICS</b> |                                            |                                        |                          |                  |                          |              |                          |                  |                          |                  |
| <b>Child sex</b>             |                                            |                                        |                          |                  |                          |              |                          |                  |                          |                  |
| Male (ref)                   | 372 (51.9)                                 | 345 (48.1)                             | 1                        |                  |                          | 1            | 1                        |                  | 1                        |                  |
| Female                       | 343 (54.9)                                 | 282 (45.1)                             | 1.15 (0.92, 1.44)        | 0.228            | 1.17 (0.92, 1.48)        | 0.192        | 1.19 (0.94, 1.51)        | 0.147            | 1.18 (0.93, 1.50)        | 0.164            |
| <b>Child age at recall</b>   |                                            |                                        |                          |                  |                          |              |                          |                  |                          |                  |
| Age in months                | (Median, IQR)<br>1.4 (1.1-2.1)             | (Median, IQR)<br>1.5 (1.1-2.4)         | <b>0.89 (0.82, 0.96)</b> | <b>0.003</b>     | <b>0.88 (0.81, 0.96)</b> | <b>0.002</b> | <b>0.87 (0.81, 0.95)</b> | <b>0.001</b>     | <b>0.87 (0.80, 0.95)</b> | <b>0.001</b>     |

For interpretation purposes, OR >1 indicates children are more likely to not be given pre-lacteal feeding and OR<1 indicates children are less likely.

Model 1 (N= 1289) included child sex, trial allocation as a priori covariates plus wealth, MAHFP, migration of HH member from unadjusted analysis with a p<0.2.

Model 2 (N=1316) included maternal age, maternal education, child sex, trial allocation as a priori covariates plus parity, antenatal visits, place of delivery from unadjusted analysis with a p<0.2.

Model 3 (N=1316) included maternal age, maternal education, child sex, trial allocation as a priori covariates plus place of delivery from Model 2 with p<0.05.

Abbreviation: OR Odds Ratio, AOR Adjusted Odds Ratio, IQR Interquartile range

**Supplementary table 7: Multivariable logistic regression analysis of factors associated with exclusive breastfeeding in past 24 hours before survey among children aged 0-5 months**

| Indicators                                   | Yes -<br>exclusively<br>breastfed<br>(N=1173)<br>n (%) | Not<br>exclusively<br>breastfed<br>(N=141)<br>n (%) | Unadjusted<br>OR (95% CI) | p value      | Model 1<br>AOR (95% CI)  | p value      | Model 2<br>AOR (95% CI)  | p value      | Model 3<br>AOR (95% CI)  | p value      |
|----------------------------------------------|--------------------------------------------------------|-----------------------------------------------------|---------------------------|--------------|--------------------------|--------------|--------------------------|--------------|--------------------------|--------------|
| <b>HOUSEHOLD CHARACTERISTICS</b>             |                                                        |                                                     |                           |              |                          |              |                          |              |                          |              |
| Wealth Quintile                              |                                                        |                                                     |                           |              |                          |              |                          |              |                          |              |
| Lowest (ref)                                 | 200 (86.6)                                             | 31 (13.4)                                           | 1                         |              | 1                        |              | 1                        |              | 1                        |              |
| Second                                       | 227 (89.4)                                             | 27 (10.6)                                           | 1.55 (0.86, 2.81)         | 0.148        | 1.74 (0.92, 3.29)        | 0.089        | 1.70 (0.90, 3.21)        | 0.100        | 1.61 (0.86, 3.00)        | 0.135        |
| Middle                                       | 250 (88.3)                                             | 33 (11.7)                                           | 1.20 (0.68, 2.11)         | 0.536        | 1.25 (0.66, 2.38)        | 0.491        | 1.24 (0.68, 2.26)        | 0.484        | 1.17 (0.65, 2.13)        | 0.597        |
| Fourth                                       | 212 (88.7)                                             | 27 (11.3)                                           | 1.38 (0.76, 2.51)         | 0.294        | 1.73 (0.85, 3.50)        | 0.130        | 1.88 (0.96, 3.69)        | 0.067        | 1.63 (0.85, 3.13)        | 0.138        |
| Highest                                      | 239 (93.4)                                             | 17 (6.6)                                            | <b>2.27 (1.18, 4.39)</b>  | <b>0.015</b> | <b>2.48 (1.12, 5.47)</b> | <b>0.025</b> | <b>2.83 (1.34, 6.00)</b> | <b>0.006</b> | <b>2.58 (1.24, 5.39)</b> | <b>0.012</b> |
| Months of adequate food provisioning (MAHFP) |                                                        |                                                     |                           |              |                          |              |                          |              |                          |              |
| For up to 7 months                           | 146 (90.1)                                             | 16 (9.9)                                            | 0.89 (0.48, 1.63)         | 0.696        | 1.18 (0.57, 2.46)        | 0.657        |                          |              |                          |              |
| For 8 to 11 months                           | 256 (85.6)                                             | 43 (14.4)                                           | <b>0.63 (0.41, 0.98)</b>  | <b>0.042</b> | 0.78 (0.47, 1.32)        | 0.347        |                          |              |                          |              |
| For 12 months (ref)                          | 766 (90.3)                                             | 82 (9.7)                                            | 1                         |              | 1                        |              |                          |              |                          |              |
| Migration of at least one household member   |                                                        |                                                     |                           |              |                          |              |                          |              |                          |              |
| No (ref)                                     | 570 (89.2)                                             | 69 (10.8)                                           | 1                         |              |                          |              |                          |              |                          |              |
| Yes                                          | 596 (89.5)                                             | 70 (10.5)                                           | 1.04 (0.71, 1.52)         | 0.841        |                          |              |                          |              |                          |              |
| Household size                               |                                                        |                                                     |                           |              |                          |              |                          |              |                          |              |
| 1-5 members                                  | 272 (89.5)                                             | 32 (10.5)                                           | 1.15 (0.73, 1.81)         | 0.554        | 1.15 (0.70, 1.89)        | 0.586        |                          |              |                          |              |
| 6-10 members (ref)                           | 690 (88.6)                                             | 89 (11.4)                                           | 1                         |              | 1                        |              |                          |              |                          |              |
| >=11 members                                 | 200 (91.3)                                             | 19 (8.7)                                            | 0.51 (0.87, 2.63)         | 0.143        | 1.27 (0.70, 2.32)        | 0.430        |                          |              |                          |              |
| Healthcare access                            |                                                        |                                                     |                           |              |                          |              |                          |              |                          |              |
| No (ref)                                     | 945 (89.7)                                             | 108 (10.3)                                          | 1                         |              | 1                        |              | 1                        |              | 1                        |              |
| Yes                                          | 135 (82.8)                                             | 28 (17.2)                                           | <b>0.53 (0.32, 0.87)</b>  | <b>0.013</b> | <b>0.50 (0.29, 0.85)</b> | <b>0.011</b> | <b>0.50 (0.10, 0.87)</b> | <b>0.013</b> | <b>0.50 (0.29, 0.85)</b> | <b>0.011</b> |
| Ethnicity/Caste                              |                                                        |                                                     |                           |              |                          |              |                          |              |                          |              |
| Dalit/ Muslim (ref)                          | 367 (90.0)                                             | 41 (10.0)                                           | 1                         |              |                          |              |                          |              |                          |              |
| Janjati/other terai caste                    | 544 (88.2)                                             | 73 (11.8)                                           | 0.84 (0.54, 1.30)         | 0.425        |                          |              |                          |              |                          |              |
| Yadav/ Brahmin                               | 262 (90.7)                                             | 27 (9.3)                                            | 1.00 (0.58, 1.75)         | 0.988        |                          |              |                          |              |                          |              |
| Religion                                     |                                                        |                                                     |                           |              |                          |              |                          |              |                          |              |
| Non-Hindu                                    | 133 (86.4)                                             | 21 (13.6)                                           | 0.82 (0.47, 1.41)         | 0.473        |                          |              |                          |              |                          |              |
| Hindu (ref)                                  | 1040 (89.7)                                            | 120 (10.3)                                          | 1                         |              |                          |              |                          |              |                          |              |
| <b>PARENTAL CHARACTERISTICS</b>              |                                                        |                                                     |                           |              |                          |              |                          |              |                          |              |
| Maternal age                                 |                                                        |                                                     |                           |              |                          |              |                          |              |                          |              |
| 15-24 years (ref)                            | 450 (89.6)                                             | 52 (10.4)                                           | 1                         |              |                          |              | 1                        |              | 1                        |              |
| 25-34 years                                  | 643 (90.3)                                             | 69 (9.7)                                            | 1.14 (0.76, 1.71)         | 0.531        |                          |              | 0.81 (0.43, 1.50)        | 0.501        | 1.17 (0.75, 1.81)        | 0.495        |
| 35-45 years                                  | 80 (80.8)                                              | 19 (19.2)                                           | <b>0.47 (0.25, 0.90)</b>  | <b>0.022</b> |                          |              | <b>0.30 (0.11, 0.80)</b> | <b>0.015</b> | 0.51 (0.25, 1.04)        | 0.065        |
| No of previous pregnancies                   |                                                        |                                                     |                           |              |                          |              |                          |              |                          |              |
| One (ref)                                    | 370 (88.7)                                             | 47 (11.3)                                           | 1                         | 1            |                          |              | 1                        |              |                          |              |
| Two                                          | 314 (88.2)                                             | 42 (11.8)                                           | 1.02 (0.64, 1.64)         | 0.926        |                          |              | 1.21 (0.65, 2.26)        | 0.549        |                          |              |
| Three                                        | 228 (92.3)                                             | 19 (7.7)                                            | 1.59 (0.88, 2.86)         | 0.124        |                          |              | 1.80 (0.80, 4.03)        | 0.158        |                          |              |
| Four or more                                 | 260 (88.7)                                             | 33 (11.3)                                           | 1.07 (0.64, 1.77)         | 0.800        |                          |              | 1.90 (0.84, 4.28)        | 0.126        |                          |              |

| Indicators                   | Yes -<br>exclusively<br>breastfed<br>(N=1173)<br>n (%) | Not<br>exclusively<br>breastfed<br>(N=141)<br>n (%) | Unadjusted<br>OR (95% CI) | p value | Model 1<br>AOR (95% CI) | p value | Model 2<br>AOR (95% CI) | p value | Model 3<br>AOR (95% CI) | p value |
|------------------------------|--------------------------------------------------------|-----------------------------------------------------|---------------------------|---------|-------------------------|---------|-------------------------|---------|-------------------------|---------|
| Maternal education           |                                                        |                                                     |                           |         |                         |         |                         |         |                         |         |
| Never went to school (ref)   | 941 (88.8)                                             | 119 (11.2)                                          | 1                         |         |                         |         | 1                       |         | 1                       |         |
| Primary                      | 89 (90.8)                                              | 9 (9.2)                                             | 1.22 (0.58, 2.58)         | 0.605   |                         |         | 1.18 (0.49, 2.83)       | 0.712   | 1.13 (0.47, 2.68)       | 0.787   |
| Secondary or above           | 143 (91.7)                                             | 13 (8.3)                                            | 1.28 (0.68, 2.41)         | 0.448   |                         |         | 1.01(0.49, 2.08)        | 0.980   | 0.96 (0.47, 1.97)       | 0.910   |
| Father's education           |                                                        |                                                     |                           |         |                         |         |                         |         |                         |         |
| Never went to school (ref)   | 758 (90.2)                                             | 82 (9.8)                                            | 1                         |         |                         |         | 1                       |         |                         |         |
| Primary                      | 132 (85.2)                                             | 23 (14.8)                                           | 0.67 (0.39, 1.16)         | 0.153   |                         |         | 0.86 (0.47, 1.58)       | 0.627   |                         |         |
| Secondary or above           | 283 (88.7)                                             | 36 (11.3)                                           | 0.84 (0.54, 1.31)         | 0.455   |                         |         | 0.73 (0.44, 1.21)       | 0.228   |                         |         |
| Antenatal visits             |                                                        |                                                     |                           |         |                         |         |                         |         |                         |         |
| None (ref)                   | 376 (89.5)                                             | 44 (10.5)                                           | 1                         |         |                         |         |                         |         |                         |         |
| 1-3 visits                   | 556 (89.1)                                             | 68 (10.9)                                           | 0.93 (0.60, 1.43)         | 0.736   |                         |         |                         |         |                         |         |
| 4+ visits                    | 241 (89.3)                                             | 29 (10.7)                                           | 1.02 (0.59, 1.75)         | 0.943   |                         |         |                         |         |                         |         |
| Place of delivery            |                                                        |                                                     |                           |         |                         |         |                         |         |                         |         |
| Home (ref)                   | 891 (88.4)                                             | 117 (11.6)                                          | 1                         |         |                         |         |                         |         |                         |         |
| Health facility              | 259 (92.2)                                             | 22 (7.8)                                            | 1.35 (0.81, 2.25)         | 0.249   |                         |         |                         |         |                         |         |
| <b>CHILD CHARACTERISTICS</b> |                                                        |                                                     |                           |         |                         |         |                         |         |                         |         |
| Child sex                    |                                                        |                                                     |                           |         |                         |         |                         |         |                         |         |
| Male (ref)                   | 622 (88.2)                                             | 83 (11.8)                                           | 1                         |         |                         | 1       |                         | 1       |                         | 1       |
| Female                       | 551 (90.5)                                             | 58 (9.5)                                            | 1.27 (0.87, 1.86)         | 0.218   | 1.22 (0.80, 1.86)       | 0.352   | 1.28 (0.83, 1.96)       | 0.260   | 1.25 (0.82, 1.91)       | 0.299   |
| Child age at recall          |                                                        |                                                     |                           |         |                         |         |                         |         |                         |         |
| Age in months                | (Median,<br>IQR)<br>1.5 (1.1-2.1)                      | (Median,<br>IQR)<br>1.5 (1.1-2.2)                   | 0.99 (0.81, 1.20)         | 0.880   | 0.95 (0.76, 1.18)       | 0.639   | 0.95 (0.76, 1.19)       | 0.655   | 0.95 (0.76, 1.19)       | 0.648   |

For interpretation purposes, OR >1 indicates children are more likely to exclusive breastfeeding in the past 24 hours before survey and OR<1 indicates children are less likely.

Model 1 (N= 1162) included child sex, child age, trial allocation as a priori covariates plus wealth, MAHFP, HH size, health care access from unadjusted analysis with a p<0.2.

Model 2 (N=1173) included maternal age, maternal education, child sex, child age, trial allocation as a priori covariates plus parity, father's education from unadjusted analysis with a p<0.2. plus, wealth from Model 1 with p<0.05.

Model 3 (N= 1173) included maternal age, maternal education, child sex, child age, trial allocation as a priori covariates plus wealth and health care access from Model 2 with p<0.05.

Abbreviation: OR Odds Ratio, AOR Adjusted Odds Ratio, IQR Interquartile range



**Supplementary table 8: Multivariable logistic regression analysis of factors associated with timing of the introduction of solid, semi-solid or soft foods among children aged 7-59 months**

| Indicators                                   | Fed between<br>6-8 months<br>(N=731)<br>n (%) | Not fed at<br>6-8 months<br>(N=582)<br>n (%) | Unadjusted<br>OR (95% CI) | p value      | Model 1<br>AOR (95% CI)  | p value      | Model 2<br>AOR (95% CI)  | p value      | Model 3<br>AOR (95% CI)  | p value      |
|----------------------------------------------|-----------------------------------------------|----------------------------------------------|---------------------------|--------------|--------------------------|--------------|--------------------------|--------------|--------------------------|--------------|
| <b>HOUSEHOLD CHARACTERISTICS</b>             |                                               |                                              |                           |              |                          |              |                          |              |                          |              |
| Wealth Quintile                              |                                               |                                              |                           |              |                          |              |                          |              |                          |              |
| Lowest (ref)                                 | 131 (18.7)                                    | 104 (18.4)                                   |                           | 1            |                          |              |                          |              |                          |              |
| Second                                       | 134 (19.1)                                    | 115 (20.4)                                   | 0.88 (0.60, 1.30)         | 0.525        |                          |              |                          |              |                          |              |
| Middle                                       | 152 (21.7)                                    | 134 (23.8)                                   | 0.86 (0.59, 1.24)         | 0.410        |                          |              |                          |              |                          |              |
| Fourth                                       | 130 (18.6)                                    | 108 (19.1)                                   | 0.95 (0.65, 1.40)         | 0.804        |                          |              |                          |              |                          |              |
| Highest                                      | 153 (21.9)                                    | 103 (18.3)                                   | 1.21 (0.82, 1.78)         | 0.341        |                          |              |                          |              |                          |              |
| Months of adequate food provisioning (MAHFP) |                                               |                                              |                           |              |                          |              |                          |              |                          |              |
| For up to 7 months                           | 91 (12.5)                                     | 72 (12.4)                                    | 1.03 (0.71, 1.49)         | 0.895        | 0.97 (0.66, 1.41)        | 0.866        |                          |              |                          |              |
| For 8 to 11 months                           | 157 (21.6)                                    | 145 (25.0)                                   | 0.82 (0.62, 1.10)         | 0.188        | 0.82 (0.60, 1.10)        | 0.181        |                          |              |                          |              |
| For 12 months (ref)                          | 480 (65.9)                                    | 363 (62.6)                                   |                           | 1            |                          | 1            |                          |              |                          |              |
| Migration of at least one household member   |                                               |                                              |                           |              |                          |              |                          |              |                          |              |
| No (ref)                                     | 362 (49.9)                                    | 270 (46.6)                                   |                           | 1            |                          | 1            |                          |              |                          |              |
| Yes                                          | 364 (50.1)                                    | 309 (53.4)                                   | 0.84 (0.66, 1.06)         | 0.138        | 0.83 (0.65, 1.06)        | 0.14         |                          |              |                          |              |
| Household size                               |                                               |                                              |                           |              |                          |              |                          |              |                          |              |
| 1-5 members                                  | 186 (25.7)                                    | 115 (19.9)                                   | <b>1.50 (1.12, 2.00)</b>  | <b>0.006</b> | <b>1.48 (1.10, 1.99)</b> | <b>0.009</b> | <b>1.53 (1.14, 2.05)</b> | <b>0.005</b> | <b>1.54 (1.15, 2.06)</b> | <b>0.004</b> |
| 6-10 members (ref)                           | 411 (56.8)                                    | 370 (64.1)                                   |                           | 1            |                          | 1            |                          | 1            |                          | 1            |
| >=11 members                                 | 127 (17.5)                                    | 92 (15.9)                                    | 1.23 (0.89, 1.70)         | 0.213        | 1.24 (0.89, 1.72)        | 0.205        | 1.19 (0.86, 1.65)        | 0.303        | 1.20 (0.86, 1.66)        | 0.283        |
| Healthcare access                            |                                               |                                              |                           |              |                          |              |                          |              |                          |              |
| No (ref)                                     | 582 (85.8)                                    | 460 (86.1)                                   |                           | 1            |                          |              |                          |              |                          |              |
| Yes                                          | 96 (14.2)                                     | 74 (13.9)                                    | 0.99 (0.69, 1.40)         | 0.941        |                          |              |                          |              |                          |              |
| Ethnicity/Caste                              |                                               |                                              |                           |              |                          |              |                          |              |                          |              |
| Dalit/ Muslim (ref)                          | 227 (31.1)                                    | 181 (31.1)                                   |                           | 1            |                          |              |                          |              |                          |              |
| Janjati/other terai caste                    | 343 (46.9)                                    | 274 (47.1)                                   | 1.08 (0.82, 1.42)         | 0.583        |                          |              |                          |              |                          |              |
| Yadav/ Brahmin                               | 161 (22.0)                                    | 127 (21.8)                                   | 1.12 (0.80, 1.56)         | 0.508        |                          |              |                          |              |                          |              |
| Religion                                     |                                               |                                              |                           |              |                          |              |                          |              |                          |              |
| Non-Hindu                                    | 85 (11.6)                                     | 72 (12.4)                                    | 0.91 (0.63, 1.31)         | 0.603        |                          |              |                          |              |                          |              |
| Hindu (ref)                                  | 646 (88.4)                                    | 510 (87.6)                                   |                           | 1            |                          |              |                          |              |                          |              |
| <b>PARENTAL CHARACTERISTICS</b>              |                                               |                                              |                           |              |                          |              |                          |              |                          |              |
| Maternal age                                 |                                               |                                              |                           |              |                          |              |                          |              |                          |              |
| 15-24 years (ref)                            | 265 (36.3)                                    | 235 (40.4)                                   |                           | 1            |                          |              | 1                        |              | 1                        |              |
| 25-34 years                                  | 401 (54.9)                                    | 313 (53.8)                                   | 1.14 (0.89, 1.45)         | 0.310        |                          |              | 1.24 (0.96, 1.61)        | 0.096        | 1.25 (0.96, 1.61)        | 0.092        |
| 35-45 years                                  | 64 (8.8)                                      | 34 (5.8)                                     | 1.61 (1.00, 2.61)         | 0.052        |                          |              | <b>1.94 (1.18, 3.21)</b> | <b>0.009</b> | <b>1.95 (1.18, 3.22)</b> | <b>0.009</b> |
| No of previous pregnancies                   |                                               |                                              |                           |              |                          |              |                          |              |                          |              |
| One (ref)                                    | 223 (30.5)                                    | 189 (32.5)                                   |                           | 1            |                          |              |                          |              |                          |              |
| Two                                          | 193 (26.4)                                    | 169 (29.0)                                   | 0.94 (0.69, 1.27)         | 0.692        |                          |              |                          |              |                          |              |

| Indicators                                    | Fed between<br>6-8 months<br>(N=731)<br>n (%) | Not fed at<br>6-8 months<br>(N=582)<br>n (%) | Unadjusted<br>OR (95% CI) | p value      | Model 1<br>AOR (95% CI)  | p value                  | Model 2<br>AOR (95% CI)  | p value                  | Model 3<br>AOR (95% CI)  | p value      |
|-----------------------------------------------|-----------------------------------------------|----------------------------------------------|---------------------------|--------------|--------------------------|--------------------------|--------------------------|--------------------------|--------------------------|--------------|
| Three                                         | 139 (19.0)                                    | 110 (18.9)                                   | 1.04 (0.74, 1.45)         | 0.826        |                          |                          |                          |                          |                          |              |
| Four or more                                  | 176 (24.1)                                    | 114 (19.6)                                   | 1.23 (0.89, 1.71)         | 0.204        |                          |                          |                          |                          |                          |              |
| Maternal education                            |                                               |                                              |                           |              |                          |                          |                          |                          |                          |              |
| Never went to school (ref)                    | 582 (79.6)                                    | 484 (83.2)                                   | 1                         |              |                          | 1                        |                          | 1                        |                          |              |
| Primary                                       | 56 (7.7)                                      | 40 (6.9)                                     | 1.06 (0.68, 1.68)         | 0.786        |                          | 1.05 (0.66, 1.68)        | 0.839                    | 1.04 (0.65, 1.65)        | 0.869                    |              |
| Secondary or above                            | 93 (12.7)                                     | 58 (10.0)                                    | 1.44 (0.99, 2.09)         | 0.053        |                          | 1.39 (0.94, 2.05)        | 1.101                    | 1.41 (0.96, 2.06)        | 0.080                    |              |
| Father's education                            |                                               |                                              |                           |              |                          |                          |                          |                          |                          |              |
| Never went to school (ref)                    | 480 (65.7)                                    | 365 (62.7)                                   | 1                         |              |                          | 1                        |                          | 1                        |                          |              |
| Primary                                       | 78 (10.7)                                     | 79 (13.6)                                    | 0.75 (0.52, 1.08)         | 0.120        |                          | 0.77 (0.53, 1.12)        | 0.175                    |                          |                          |              |
| Secondary or above                            | 173 (23.7)                                    | 138 (23.7)                                   | 1.01 (0.76, 1.34)         | 0.936        |                          | 0.97 (0.72, 1.30)        | 0.837                    |                          |                          |              |
| Antenatal visits                              |                                               |                                              |                           |              |                          |                          |                          |                          |                          |              |
| None (ref)                                    | 207 (28.3)                                    | 209 (35.9)                                   | 1                         |              |                          | 1                        |                          | 1                        |                          |              |
| 1-3 visits                                    | 366 (50.1)                                    | 263 (45.2)                                   | <b>1.44 (1.10, 1.89)</b>  | <b>0.008</b> |                          | <b>1.45 (1.09, 1.91)</b> | <b>0.010</b>             | <b>1.45 (1.09, 1.91)</b> | <b>0.010</b>             |              |
| 4+ visits                                     | 158 (21.6)                                    | 110 (18.9)                                   | <b>1.52 (1.08, 2.12)</b>  | <b>0.015</b> |                          | <b>1.58 (1.11, 2.25)</b> | <b>0.010</b>             | <b>1.58 (1.11, 2.24)</b> | <b>0.011</b>             |              |
| Place of delivery                             |                                               |                                              |                           |              |                          |                          |                          |                          |                          |              |
| Home (ref)                                    | 559 (77.5)                                    | 448 (79.0)                                   | 1                         |              |                          |                          |                          |                          |                          |              |
| Health facility                               | 162 (22.5)                                    | 119 (21.0)                                   | 1.12 (0.84, 1.50)         | 0.439        |                          |                          |                          |                          |                          |              |
| <b>CHILD CHARACTERISTICS</b>                  |                                               |                                              |                           |              |                          |                          |                          |                          |                          |              |
| Child sex                                     |                                               |                                              |                           |              |                          |                          |                          |                          |                          |              |
| Male (ref)                                    | 368 (50.3)                                    | 336 (57.7)                                   | 1                         |              |                          | 1                        |                          | 1                        |                          |              |
| Female                                        | 368 (49.7)                                    | 246 (42.3)                                   | <b>1.34 (1.06, 1.69)</b>  | <b>0.015</b> | <b>1.30 (1.02, 1.65)</b> | <b>0.032</b>             | <b>1.28 (1.01, 1.63)</b> | <b>0.041</b>             | <b>1.29 (1.01, 1.64)</b> | <b>0.038</b> |
| Child age group in months at follow-up survey |                                               |                                              |                           |              |                          |                          |                          |                          |                          |              |
| 7 to 24                                       | 244 (33.4)                                    | 178 (30.6)                                   | 1.08 (0.82, 1.42)         | 0.592        | 1.08 (0.82, 1.44)        | 0.583                    | 1.10 (0.83, 1.47)        | 0.498                    | 1.11 (0.83, 1.47)        | 0.481        |
| 25 to 42                                      | 188 (25.7)                                    | 168 (28.9)                                   | 0.93 (0.69, 1.23)         | 0.596        | 0.94 (0.70, 1.27)        | 0.703                    | 0.95 (0.70, 1.28)        | 0.724                    | 0.95 (0.71, 1.28)        | 0.759        |
| 43 to 59 (ref)                                | 299 (40.9)                                    | 236 (40.5)                                   | 1                         |              |                          | 1                        |                          | 1                        |                          |              |

For interpretation purposes, OR >1 indicates children are more likely to be introduced to solid, semi-solid or soft foods between 6-8 months and OR<1 indicates children are less likely.

Model 1 (N=1288) included child sex, child age, trial allocation as a priori covariates plus migration of HH member, MAHFP, HH size from unadjusted analysis with a p<0.2.

Model 2 (N=1300) included maternal age, maternal education, child sex, child age, trial allocation as a priori covariates plus father's education, antenatal visits from unadjusted analysis with a p<0.2 plus, HH size from Model 1 with p<0.05.

Model 3 (N=1300) included maternal age, maternal education, child sex, child age, trial allocation as a priori covariates plus HH size, antenatal visits from Model 2 with p<0.05.

Abbreviation: OR Odds Ratio, AOR Adjusted Odds Ratio

**Supplementary table 9: Multivariable logistic regression analysis of factors associated with minimum dietary diversity among children aged 7-59 months**

| Indicators                                   | MDD achieved<br>(N=846)<br>n (%) | MDD not achieved<br>(N=506)<br>n (%) | Unadjusted<br>OR (95% CI) | p value          | Model 1<br>(95% CI)      | AOR              | p value                  | Model 2<br>AOR (95% CI) | p value                  | Model 3<br>AOR (95% CI) | p value |
|----------------------------------------------|----------------------------------|--------------------------------------|---------------------------|------------------|--------------------------|------------------|--------------------------|-------------------------|--------------------------|-------------------------|---------|
| <b>HOUSEHOLD CHARACTERISTICS</b>             |                                  |                                      |                           |                  |                          |                  |                          |                         |                          |                         |         |
| Wealth Quintile                              |                                  |                                      |                           |                  |                          |                  |                          |                         |                          |                         |         |
| Lowest (ref)                                 | 132 (16.2)                       | 111 (23.0)                           |                           | 1                |                          |                  | 1                        |                         | 1                        |                         | 1       |
| Second                                       | 149 (18.3)                       | 111 (23.0)                           | 1.14 (0.79, 1.63)         | 0.491            | 1.19 (0.80, 1.76)        | 0.389            | 1.10 (0.76, 1.61)        | 0.609                   | 1.16 (0.80, 1.68)        | 0.438                   |         |
| Middle                                       | 187 (22.9)                       | 105 (21.7)                           | <b>1.55 (1.09, 2.21)</b>  | <b>0.016</b>     | <b>1.64 (1.09, 2.47)</b> | <b>0.018</b>     | <b>1.53 (1.06, 2.22)</b> | <b>0.025</b>            | <b>1.60 (1.11, 2.31)</b> | <b>0.012</b>            |         |
| Fourth                                       | 164 (20.1)                       | 79 (16.4)                            | <b>1.76 (1.21, 2.56)</b>  | <b>0.003</b>     | <b>1.89 (1.21, 2.96)</b> | <b>0.006</b>     | <b>1.63 (1.08, 2.44)</b> | <b>0.019</b>            | <b>1.79 (1.21, 2.66)</b> | <b>0.004</b>            |         |
| Highest                                      | 184 (22.5)                       | 77 (15.9)                            | <b>2.06 (1.41, 3.00)</b>  | <b>&lt;0.001</b> | <b>2.43 (1.51, 3.91)</b> | <b>&lt;0.001</b> | <b>1.93 (1.28, 2.93)</b> | <b>0.002</b>            | <b>2.12 (1.41, 3.17)</b> | <b>&lt;0.001</b>        |         |
| Months of adequate food provisioning (MAHFP) |                                  |                                      |                           |                  |                          |                  |                          |                         |                          |                         |         |
| For up to 7 months                           | 94 (11.2)                        | 75 (14.9)                            | <b>0.69 (0.49, 0.98)</b>  | <b>0.038</b>     | 1.06 (0.70, 1.60)        | 0.798            |                          |                         |                          |                         |         |
| For 8 to 11 months                           | 202 (24.0)                       | 110 (21.8)                           | 1.09 (0.83, 1.45)         | 0.538            | 1.30 (0.94, 1.80)        | 0.109            |                          |                         |                          |                         |         |
| For 12 months (ref)                          | 547 (64.9)                       | 319 (63.3)                           |                           | 1                |                          | 1                |                          |                         |                          |                         |         |
| Migration of at least one household member   |                                  |                                      |                           |                  |                          |                  |                          |                         |                          |                         |         |
| No (ref)                                     | 429 (51.0)                       | 225 (44.8)                           |                           | 1                |                          | 1                |                          |                         |                          |                         |         |
| Yes                                          | 412 (49.0)                       | 277 (55.2)                           | <b>0.79 (0.63, 0.99)</b>  | <b>0.041</b>     | 0.80 (0.62, 1.03)        | 0.082            |                          |                         |                          |                         |         |
| Household size                               |                                  |                                      |                           |                  |                          |                  |                          |                         |                          |                         |         |
| 1-5 members                                  | 187 (22.3)                       | 124 (24.8)                           | 0.82 (0.63, 1.08)         | 0.168            | 0.86 (0.64, 1.16)        | 0.331            |                          |                         |                          |                         |         |
| 6-10 members (ref)                           | 517 (61.6)                       | 289 (57.7)                           |                           | 1                |                          | 1                |                          |                         |                          |                         |         |
| >=11 members                                 | 135 (16.1)                       | 88 (17.6)                            | 0.87 (0.64, 1.19)         | 0.373            | 0.86 (0.61, 1.20)        | 0.373            |                          |                         |                          |                         |         |
| Healthcare access                            |                                  |                                      |                           |                  |                          |                  |                          |                         |                          |                         |         |
| No (ref)                                     | 664 (85.8)                       | 413 (86.8)                           |                           | 1                |                          | 1                |                          |                         |                          |                         |         |
| Yes                                          | 110 (14.2)                       | 63 (13.2)                            | 1.07 (0.76, 1.51)         | 0.679            |                          |                  |                          |                         |                          |                         |         |
| Ethnicity/Caste                              |                                  |                                      |                           |                  |                          |                  |                          |                         |                          |                         |         |
| Dalit/ Muslim (ref)                          | 233 (27.5)                       | 185 (36.6)                           |                           | 1                |                          | 1                |                          |                         |                          |                         |         |
| Janjati/other terai caste                    | 412 (48.7)                       | 227 (44.9)                           | <b>1.50 (1.15, 1.95)</b>  | <b>0.002</b>     | 1.24 (0.93, 1.65)        | 0.143            |                          |                         |                          |                         |         |
| Yadav/ Brahmin                               | 201 (23.8)                       | 94 (18.6)                            | <b>1.78 (1.28, 2.47)</b>  | <b>0.001</b>     | 1.43 (0.99, 2.06)        | 0.060            |                          |                         |                          |                         |         |
| Religion                                     |                                  |                                      |                           |                  |                          |                  |                          |                         |                          |                         |         |
| Non-Hindu                                    | 98 (11.6)                        | 60 (11.9)                            | 0.94 (0.66, 1.34)         | 0.733            |                          |                  |                          |                         |                          |                         |         |
| Hindu (ref)                                  | 748 (88.4)                       | 446 (88.1)                           |                           | 1                |                          | 1                |                          |                         |                          |                         |         |
| <b>PARENTAL CHARACTERISTICS</b>              |                                  |                                      |                           |                  |                          |                  |                          |                         |                          |                         |         |
| Maternal age                                 |                                  |                                      |                           |                  |                          |                  |                          |                         |                          |                         |         |
| 15-24 years (ref)                            | 325 (38.5)                       | 196 (38.7)                           |                           | 1                |                          |                  |                          | 1                       |                          | 1                       |         |
| 25-34 years                                  | 467 (55.3)                       | 262 (51.8)                           | 1.07 (0.85, 1.36)         | 0.558            |                          |                  | 0.91 (0.62, 1.32)        | 0.608                   | 0.89 (0.68, 1.15)        | 0.358                   |         |
| 35-45 years                                  | 53 (6.3)                         | 48 (9.5)                             | 0.66 (0.42, 1.02)         | 0.060            |                          |                  | 0.68 (0.37, 1.27)        | 0.229                   | <b>0.60 (0.38, 0.97)</b> | <b>0.036</b>            |         |
| No of previous pregnancies                   |                                  |                                      |                           |                  |                          |                  |                          |                         |                          |                         |         |
| One (ref)                                    | 276 (32.6)                       | 154 (30.5)                           |                           | 1                |                          |                  |                          | 1                       |                          | 1                       |         |
| Two                                          | 238 (28.1)                       | 128 (25.3)                           | 1.04 (0.77, 1.41)         | 0.777            |                          |                  | 1.10 (0.76, 1.60)        | 0.602                   |                          |                         |         |
| Three                                        | 162 (19.1)                       | 94 (18.6)                            | 0.96 (0.69, 1.33)         | 0.811            |                          |                  | 1.07 (0.67, 1.69)        | 0.788                   |                          |                         |         |
| Four or more                                 | 170 (20.1)                       | 129 (25.5)                           | 0.73 (0.54, 1.00)         | 0.051            |                          |                  | 0.94 (0.57, 1.53)        | 0.791                   |                          |                         |         |
| Maternal education                           |                                  |                                      |                           |                  |                          |                  |                          |                         |                          |                         |         |
| Never went to school (ref)                   | 670 (79.2)                       | 427 (84.4)                           |                           | 1                |                          |                  |                          | 1                       |                          | 1                       |         |

| Indicators                                    | MDD achieved<br>(N=846)<br>n (%) | MDD not achieved<br>(N=506)<br>n (%) | Unadjusted<br>OR (95% CI) | p value          | Model 1<br>(95% CI)      | AOR              | p value                  | Model 2<br>AOR (95% CI) | p value                  | Model 3<br>AOR (95% CI) | p value          |
|-----------------------------------------------|----------------------------------|--------------------------------------|---------------------------|------------------|--------------------------|------------------|--------------------------|-------------------------|--------------------------|-------------------------|------------------|
| Primary                                       | 63 (7.4)                         | 35 (6.9)                             | 1.14 (0.73,1.77)          | 0.565            |                          |                  |                          | 0.86 (0.54, 1.37)       | 0.524                    | 0.91 (0.57, 1.45)       | 0.688            |
| Secondary or above                            | 113 (13.4)                       | 44 (8.7)                             | <b>1.64 (1.13, 2.40)</b>  | <b>0.010</b>     |                          |                  |                          | 1.25 (0.82, 1.89)       | 0.303                    | 1.31 (0.87, 1.98)       | 0.199            |
| Father's education                            |                                  |                                      |                           |                  |                          |                  |                          |                         |                          |                         |                  |
| Never went to school (ref)                    | 528 (62.4)                       | 339 (67.0)                           |                           | 1                |                          |                  |                          |                         | 1                        |                         |                  |
| Primary                                       | 102 (12.1)                       | 59 (11.7)                            | 1.10 (0.77, 1.58)         | 0.595            |                          |                  |                          | 1.10 (0.76, 1.61)       | 0.610                    |                         |                  |
| Secondary or above                            | 216 (25.5)                       | 108 (21.3)                           | 1.31 (0.99, 1.72)         | 0.057            |                          |                  |                          | 1.15 (0.85, 1.56)       | 0.367                    |                         |                  |
| Antenatal visits                              |                                  |                                      |                           |                  |                          |                  |                          |                         |                          |                         |                  |
| None (ref)                                    | 250 (29.6)                       | 185 (36.6)                           |                           | 1                |                          |                  |                          |                         | 1                        |                         |                  |
| 1-3 visits                                    | 411 (48.6)                       | 231 (45.7)                           | 1.31 (1.01, 1.69)         | 0.041            |                          |                  |                          | 1.21 (0.91, 1.59)       | 0.183                    |                         |                  |
| 4+ visits                                     | 185 (21.9)                       | 90 (17.8)                            | 1.48 (1.07, 2.04)         | 0.019            |                          |                  |                          | 1.37 (0.96, 1.96)       | 0.086                    |                         |                  |
| Place of delivery                             |                                  |                                      |                           |                  |                          |                  |                          |                         |                          |                         |                  |
| Home (ref)                                    | 640 (77.0)                       | 398 (80.4)                           |                           | 1                |                          |                  |                          |                         |                          |                         |                  |
| Health facility                               | 191 (23.0)                       | 97 (19.6)                            | 1.20 (0.90, 1.59)         | 0.211            |                          |                  |                          |                         |                          |                         |                  |
| <b>CHILD CHARACTERISTICS</b>                  |                                  |                                      |                           |                  |                          |                  |                          |                         |                          |                         |                  |
| Child sex                                     |                                  |                                      |                           |                  |                          |                  |                          |                         |                          |                         |                  |
| Male (ref)                                    | 455 (53.8)                       | 268 (53.0)                           |                           | 1                |                          |                  |                          |                         | 1                        |                         | 1                |
| Female                                        | 391 (46.2)                       | 238 (47.0)                           | 0.97 (0.78, 1.22)         | 0.824            | 0.97 (0.76, 1.23)        | 0.810            | 0.97 (0.76, 1.23)        | 0.810                   | 0.97 (0.77, 1.23)        | 0.813                   | 0.813            |
| Child age group in months at follow-up survey |                                  |                                      |                           |                  |                          |                  |                          |                         |                          |                         |                  |
| 7 to 24                                       | 218 (25.8)                       | 219 (43.3)                           | <b>0.40 (0.30, 0.52)</b>  | <b>&lt;0.001</b> | <b>0.39 (0.29, 0.52)</b> | <b>&lt;0.001</b> | <b>0.36 (0.27, 0.48)</b> | <b>&lt;0.001</b>        | <b>0.36 (0.27, 0.48)</b> | <b>&lt;0.001</b>        | <b>&lt;0.001</b> |
| 25 to 42                                      | 236 (27.9)                       | 126 (24.9)                           | 0.76 (0.57, 1.01)         | 0.062            | 0.74 (0.55, 1.01)        | 0.058            | <b>0.70 (0.52, 0.95)</b> | <b>0.023</b>            | <b>0.70 (0.52, 0.95)</b> | <b>0.023</b>            | <b>0.023</b>     |
| 43 to 59 (ref)                                | 392 (46.3)                       | 161 (31.8)                           |                           | 1                |                          |                  |                          |                         | 1                        |                         |                  |

For interpretation purposes, OR >1 indicates children are more likely to achieve MDD and OR<1 indicates children are less likely.

Model 1 (N= 1284) included child sex, child age, trial allocation as a priori covariates plus wealth, MAHFP, migration of HH member, HH size, ethnicity from unadjusted analysis with a p<0.2. Model 2 (N=1298) included maternal age, maternal education, child sex, child age, trial allocation as a priori covariates plus father's education, antenatal visits from unadjusted analysis with a p<0.2. plus, wealth from Model 1 with p<0.05.

Model 3 (N=1298) included maternal age, maternal education, child sex, child age, trial allocation as a priori covariates plus wealth from Model 2 with p<0.05.

Abbreviation: MDD Minimum Dietary Diversity, OR Odds Ratio, AOR Adjusted Odds Ratio

**Supplementary table 10: Multivariable logistic regression analysis of factors associated with consumption of animal foods among children aged 7-59 months**

| Indicators                                   | Yes -fed animal foods (N=391) n (%) | No - not fed animal foods (N=961) n (%) | Unadjusted OR (95% CI)   | p value          | Model 1 AOR (95% CI)     | p value      | Model 2 AOR (95% CI)     | p value      | Model 3 AOR (95% CI)     | p value          |
|----------------------------------------------|-------------------------------------|-----------------------------------------|--------------------------|------------------|--------------------------|--------------|--------------------------|--------------|--------------------------|------------------|
| <b>HOUSEHOLD CHARACTERISTICS</b>             |                                     |                                         |                          |                  |                          |              |                          |              |                          |                  |
| Wealth Quintile                              |                                     |                                         |                          |                  |                          |              |                          |              |                          |                  |
| Lowest (ref)                                 | 79 (20.9)                           | 164 (17.8)                              |                          | 1                |                          | 1            |                          |              |                          |                  |
| Second                                       | 83 (22.0)                           | 177 (19.2)                              | 0.97 (0.65, 1.44)        | 0.872            | 1.12 (0.73, 1.72)        | 0.607        |                          |              |                          |                  |
| Middle                                       | 73 (19.3)                           | 219 (23.8)                              | <b>0.67 (0.45, 0.99)</b> | <b>0.046</b>     | 0.85 (0.54, 1.34)        | 0.489        |                          |              |                          |                  |
| Fourth                                       | 66 (17.5)                           | 177 (19.2)                              | 0.73 (0.49, 1.11)        | 0.142            | 1.05 (0.64, 1.72)        | 0.839        |                          |              |                          |                  |
| Highest                                      | 77 (20.4)                           | 184 (20.0)                              | 0.79 (0.53, 1.18)        | 0.248            | 1.33 (0.79, 2.22)        | 0.282        |                          |              |                          |                  |
| Months of adequate food provisioning (MAHFP) |                                     |                                         |                          |                  |                          |              |                          |              |                          |                  |
| For up to 7 months                           | 57 (14.6)                           | 112 (11.7)                              | 1.40 (0.97, 2.05)        | 0.084            | 1.24 (0.79, 1.96)        | 0.354        |                          |              |                          |                  |
| For 8 to 11 months                           | 90 (23.0)                           | 222 (23.2)                              | 1.21 (0.88, 1.66)        | 0.236            | 1.18 (0.83, 1.69)        | 0.356        |                          |              |                          |                  |
| For 12 months (ref)                          | 244 (62.4)                          | 622 (65.1)                              |                          | 1                |                          | 1            |                          |              |                          |                  |
| Migration of at least one household member   |                                     |                                         |                          |                  |                          |              |                          |              |                          |                  |
| No (ref)                                     | 187 (47.9)                          | 467 (49.0)                              |                          | 1                |                          |              |                          |              |                          |                  |
| Yes                                          | 203 (52.1)                          | 486 (51.0)                              | 1.03 (0.80, 1.33)        | 0.796            |                          |              |                          |              |                          |                  |
| Household size                               |                                     |                                         |                          |                  |                          |              |                          |              |                          |                  |
| 1-5 members                                  | 103 (26.7)                          | 208 (21.8)                              | 1.25 (0.93, 1.69)        | 0.134            | 1.30 (0.95, 1.77)        | 0.108        |                          |              |                          |                  |
| 6-10 members (ref)                           | 231 (59.8)                          | 575 (60.3)                              |                          | 1                |                          | 1            |                          |              |                          |                  |
| >=11 members                                 | 52 (13.5)                           | 171 (17.9)                              | 0.76 (0.53, 1.10)        | 0.147            | 0.82 (0.56, 1.21)        | 0.322        |                          |              |                          |                  |
| Healthcare access                            |                                     |                                         |                          |                  |                          |              |                          |              |                          |                  |
| No (ref)                                     | 309 (86.3)                          | 768 (86.1)                              |                          | 1                |                          |              |                          |              |                          |                  |
| Yes                                          | 49 (13.7)                           | 124 (13.9)                              | 0.98 (0.67, 1.42)        | 0.914            |                          |              |                          |              |                          |                  |
| Ethnicity/Caste                              |                                     |                                         |                          |                  |                          |              |                          |              |                          |                  |
| Dalit/ Muslim (ref)                          | 158 (40.4)                          | 260 (27.1)                              |                          | 1                |                          | 1            |                          | 1            |                          | 1                |
| Janjati/other terai caste                    | 166 (42.5)                          | 473 (49.2)                              | <b>0.58 (0.44, 0.77)</b> | <b>&lt;0.001</b> | <b>0.69 (0.47, 0.99)</b> | <b>0.045</b> | <b>0.68 (0.48, 0.96)</b> | <b>0.027</b> | <b>0.58 (0.43, 0.78)</b> | <b>&lt;0.001</b> |
| Yadav/ Brahmin                               | 67 (17.1)                           | 228 (23.7)                              | <b>0.48 (0.34, 0.69)</b> | <b>&lt;0.001</b> | <b>0.59 (0.37, 0.93)</b> | <b>0.023</b> | <b>0.57 (0.38, 0.87)</b> | <b>0.009</b> | <b>0.49 (0.33, 0.71)</b> | <b>&lt;0.001</b> |
| Religion                                     |                                     |                                         |                          |                  |                          |              |                          |              |                          |                  |
| Non-Hindu                                    | 72 (18.4)                           | 86 (8.9)                                | <b>2.16 (1.50, 3.13)</b> | <b>&lt;0.001</b> | <b>1.78 (1.10, 2.86)</b> | <b>0.018</b> | 1.54 (0.99, 2.40)        | 0.056        |                          |                  |
| Hindu (ref)                                  | 319 (81.6)                          | 875 (91.9)                              |                          | 1                |                          | 1            |                          | 1            |                          |                  |
| <b>PARENTAL CHARACTERISTICS</b>              |                                     |                                         |                          |                  |                          |              |                          |              |                          |                  |
| Maternal age                                 |                                     |                                         |                          |                  |                          |              |                          |              |                          |                  |
| 15-24 years (ref)                            | 156 (40.0)                          | 365 (38.0)                              |                          | 1                |                          |              |                          | 1            |                          | 1                |
| 25-34 years                                  | 213 (54.6)                          | 516 (53.7)                              | 0.98 (0.75, 1.26)        | 0.852            |                          |              | 0.92 (0.62, 1.37)        | 0.691        | 0.89 (0.68, 1.71)        | 0.392            |
| 35-45 years                                  | 21 (5.4)                            | 80 (8.3)                                | 0.63 (0.37, 1.08)        | 0.093            |                          |              | 0.64 (0.32, 1.28)        | 0.206        | <b>0.52 (0.30, 0.90)</b> | <b>0.020</b>     |
| No of previous pregnancies                   |                                     |                                         |                          |                  |                          |              |                          |              |                          |                  |
| One (ref)                                    | 133 (34.0)                          | 297 (30.9)                              |                          | 1                |                          |              |                          | 1            |                          |                  |
| Two                                          | 105 (26.9)                          | 261 (27.2)                              | 0.93 (0.67, 1.28)        | 0.649            |                          |              | 0.95 (0.65, 1.41)        | 0.810        |                          |                  |
| Three                                        | 80 (20.5)                           | 176 (18.3)                              | 1.05 (0.74, 1.49)        | 0.792            |                          |              | 1.09 (0.68, 1.75)        | 0.728        |                          |                  |
| Four or more                                 | 73 (18.7)                           | 226 (23.5)                              | 0.72 (0.51, 1.02)        | 0.066            |                          |              | 0.80 (0.48, 1.34)        | 0.403        |                          |                  |

| Indicators                                           | Yes -fed animal foods (N=391) n (%) | No - not fed animal foods (N=961) n (%) | Unadjusted OR (95% CI)   | p value          | Model 1 AOR (95% CI)     | p value      | Model 2 AOR (95% CI)     | p value          | Model 3 AOR (95% CI)     | p value          |
|------------------------------------------------------|-------------------------------------|-----------------------------------------|--------------------------|------------------|--------------------------|--------------|--------------------------|------------------|--------------------------|------------------|
| <b>Maternal education</b>                            |                                     |                                         |                          |                  |                          |              |                          |                  |                          |                  |
| Never went to school (ref)                           | 321 (82.1)                          | 776 (80.7)                              | 1                        |                  |                          |              | 1                        |                  | 1                        |                  |
| Primary                                              | 31 (7.9)                            | 67 (7.0)                                | 1.04 (0.65, 1.67)        | 0.866            |                          |              | 1.18 (0.72, 1.93)        | 0.521            | 1.19 (0.72, 1.95)        | 0.497            |
| Secondary or above                                   | 39 (10.0)                           | 118 (12.3)                              | 0.81 (0.54, 1.21)        | 0.299            |                          |              | 0.98 (0.64, 1.51)        | 0.937            | 0.98 (0.64, 1.50)        | 0.918            |
| <b>Father's education</b>                            |                                     |                                         |                          |                  |                          |              |                          |                  |                          |                  |
| Never went to school (ref)                           | 280 (71.6)                          | 587 (61.1)                              | 1                        |                  |                          |              | 1                        |                  | 1                        |                  |
| Primary                                              | 38 (9.7)                            | 123 (12.8)                              | 0.69 (0.45, 1.03)        | 0.071            |                          |              | <b>0.65 (0.43, 0.99)</b> | <b>0.047</b>     | <b>0.66 (0.43, 1.00)</b> | <b>0.050</b>     |
| Secondary or above                                   | 73 (18.7)                           | 251 (26.1)                              | <b>0.60 (0.44, 0.83)</b> | <b>0.002</b>     |                          |              | <b>0.64 (0.46, 0.89)</b> | <b>0.008</b>     | <b>0.63 (0.45, 0.87)</b> | <b>0.006</b>     |
| <b>Antenatal visits</b>                              |                                     |                                         |                          |                  |                          |              |                          |                  |                          |                  |
| None (ref)                                           | 118 (30.2)                          | 317 (33.0)                              | 1                        |                  |                          |              |                          |                  |                          |                  |
| 1-3 visits                                           | 200 (51.2)                          | 442 (46.0)                              | 1.19 (0.89, 1.58)        | 0.242            |                          |              |                          |                  |                          |                  |
| 4+ visits                                            | 73 (18.7)                           | 202 (21.0)                              | 0.93 (0.65, 1.33)        | 0.678            |                          |              |                          |                  |                          |                  |
| <b>Place of delivery</b>                             |                                     |                                         |                          |                  |                          |              |                          |                  |                          |                  |
| Home (ref)                                           | 289 (75.7)                          | 749 (79.3)                              | 1                        |                  |                          |              |                          |                  |                          |                  |
| Health facility                                      | 93 (24.3)                           | 195 (20.7)                              | 1.18 (0.87, 1.60)        | 0.289            |                          |              |                          |                  |                          |                  |
| <b>CHILD CHARACTERISTICS</b>                         |                                     |                                         |                          |                  |                          |              |                          |                  |                          |                  |
| <b>Child sex</b>                                     |                                     |                                         |                          |                  |                          |              |                          |                  |                          |                  |
| Male (ref)                                           | 204 (52.2)                          | 519 (54.0)                              | 1                        |                  |                          | 1            | 1                        |                  | 1                        |                  |
| Female                                               | 187 (47.8)                          | 442 (46.0)                              | 1.07 (0.83, 1.37)        | 0.604            | 1.11 (0.85, 1.44)        | 0.450        | 1.10 (0.85, 1.43)        | 0.454            | 1.11 (0.86, 1.43)        | 0.426            |
| <b>Child age group in months at follow-up survey</b> |                                     |                                         |                          |                  |                          |              |                          |                  |                          |                  |
| 7 to 24                                              | 99 (25.3)                           | 338 (35.2)                              | <b>0.58 (0.42, 0.78)</b> | <b>&lt;0.001</b> | <b>0.61 (0.44, 0.84)</b> | <b>0.002</b> | <b>0.55 (0.40, 0.76)</b> | <b>&lt;0.001</b> | <b>0.55 (0.40, 0.75)</b> | <b>&lt;0.001</b> |
| 25 to 42                                             | 115 (29.4)                          | 247 (25.7)                              | 0.97 (0.72, 1.31)        | 0.860            | 1.03 (0.75, 1.41)        | 0.862        | 0.98 (0.72, 1.34)        | 0.923            | 0.98 (0.72, 1.33)        | 0.879            |
| 43 to 59 (ref)                                       | 177 (45.3)                          | 376 (39.1)                              | 1                        |                  | 1                        |              | 1                        |                  | 1                        |                  |

For interpretation purposes, OR >1 indicates children are more likely to eat animal-source foods and OR<1 indicates children are less likely.

Model 1 (N= 1284) included child sex, child age, trial allocation as a priori covariates plus wealth, MAHFP, HH size, ethnicity, religion from unadjusted analysis with a p<0.2.

Model 2 (N=1350) included maternal age, maternal education, child sex, child age, trial allocation as a priori covariates plus parity, fathers' education from unadjusted analysis with a p<0.2 and ethnicity and religion from Model 1 with p<0.05.

Model 3 (N=1351) included maternal age, maternal education, child sex, child age, trial allocation as a priori covariates plus, fathers' education, ethnicity from Model 2 with p<0.05

Abbreviation: OR Odds Ratio, AOR Adjusted Odds Ratio

**Supplementary table 11: Multivariable logistic regression analysis of factors associated with consumption of fruits and vegetables among children aged 7-59 months**

| Indicators                                   | Yes - fed fruits and veg (N=1138) n (%) | No - not fed fruits and veg (N=214) n (%) | Unadjusted OR (95% CI)   | p value      | Model 1 AOR (95% CI) | p value           | Model 2 AOR (95% CI) | p value           | Model 3 AOR (95% CI) | p value |
|----------------------------------------------|-----------------------------------------|-------------------------------------------|--------------------------|--------------|----------------------|-------------------|----------------------|-------------------|----------------------|---------|
| <b>HOUSEHOLD CHARACTERISTICS</b>             |                                         |                                           |                          |              |                      |                   |                      |                   |                      |         |
| Wealth Quintile                              |                                         |                                           |                          |              |                      |                   |                      |                   |                      |         |
| Lowest (ref)                                 | 205 (18.7)                              | 38 (18.7)                                 | 1                        |              |                      |                   |                      |                   |                      |         |
| Second                                       | 215 (19.6)                              | 45 (22.2)                                 | 0.89 (0.55, 1.43)        | 0.629        |                      |                   |                      |                   |                      |         |
| Middle                                       | 249 (22.7)                              | 43 (21.2)                                 | 1.08 (0.67, 1.75)        | 0.736        |                      |                   |                      |                   |                      |         |
| Fourth                                       | 207 (18.9)                              | 36 (17.7)                                 | 1.09 (0.65, 1.78)        | 0.768        |                      |                   |                      |                   |                      |         |
| Highest                                      | 220 (20.1)                              | 41 (20.2)                                 | 1.00 (0.62, 1.63)        | 0.994        |                      |                   |                      |                   |                      |         |
| Months of adequate food provisioning (MAHFP) |                                         |                                           |                          |              |                      |                   |                      |                   |                      |         |
| For up to 7 months                           | 141 (12.4)                              | 28 (13.1)                                 | 0.95 (0.61, 1.50)        | 0.839        |                      |                   |                      |                   |                      |         |
| For 8 to 11 months                           | 267 (23.5)                              | 45 (21.1)                                 | 1.15 (0.80, 1.67)        | 0.461        |                      |                   |                      |                   |                      |         |
| For 12 months (ref)                          | 726 (64.0)                              | 140 (65.7)                                | 1                        |              |                      |                   |                      |                   |                      |         |
| Migration of at least one household member   |                                         |                                           |                          |              |                      |                   |                      |                   |                      |         |
| No (ref)                                     | 562 (49.6)                              | 92 (43.6)                                 | 1                        |              |                      | 1                 |                      |                   |                      |         |
| Yes                                          | 570 (50.4)                              | 119 (56.4)                                | 0.78 (0.58, 1.05)        | 0.106        | 0.80 (0.58, 1.10)    | 0.169             |                      |                   |                      |         |
| Household size                               |                                         |                                           |                          |              |                      |                   |                      |                   |                      |         |
| 1-5 members                                  | 255 (22.6)                              | 56 (26.4)                                 | 0.74 (0.52, 1.05)        | 0.101        | 0.74 (0.51, 1.08)    | 0.114             |                      |                   |                      |         |
| 6-10 members (ref)                           | 693 (61.4)                              | 113 (53.3)                                | 1                        |              | 1                    |                   |                      |                   |                      |         |
| >=11 members                                 | 180 (16.0)                              | 43 (20.3)                                 | <b>0.68 (0.46, 1.01)</b> | <b>0.057</b> | 0.79 (0.52, 1.20)    | 0.267             |                      |                   |                      |         |
| Healthcare access                            |                                         |                                           |                          |              |                      |                   |                      |                   |                      |         |
| No (ref)                                     | 901 (85.8)                              | 176 (88.0)                                | 1                        |              |                      |                   |                      |                   |                      |         |
| Yes                                          | 149 (14.2)                              | 24 (12.0)                                 | 1.21 (0.76, 1.92)        | 0.427        |                      |                   |                      |                   |                      |         |
| Ethnicity/Caste                              |                                         |                                           |                          |              |                      |                   |                      |                   |                      |         |
| Dalit/ Muslim (ref)                          | 344 (30.2)                              | 74 (34.6)                                 | 1                        |              |                      |                   |                      |                   |                      |         |
| Janjati/other terai caste                    | 542 (47.6)                              | 97 (45.3)                                 | 1.24 (0.88, 1.74)        | 0.217        |                      |                   |                      |                   |                      |         |
| Yadav/ Brahmin                               | 252 (22.1)                              | 43 (20.1)                                 | 1.31 (0.86, 2.00)        | 0.206        |                      |                   |                      |                   |                      |         |
| Religion                                     |                                         |                                           |                          |              |                      |                   |                      |                   |                      |         |
| Non-Hindu                                    | 130 (11.4)                              | 28 (13.1)                                 | 0.82 (0.52, 1.29)        | 0.398        |                      |                   |                      |                   |                      |         |
| Hindu (ref)                                  | 1008 (88.6)                             | 186 (86.9)                                | 1                        |              |                      |                   |                      |                   |                      |         |
| <b>PARENTAL CHARACTERISTICS</b>              |                                         |                                           |                          |              |                      |                   |                      |                   |                      |         |
| Maternal age                                 |                                         |                                           |                          |              |                      |                   |                      |                   |                      |         |
| 15-24 years (ref)                            | 422 (37.1)                              | 99 (46.3)                                 | 1                        |              |                      | 1                 |                      | 1                 |                      |         |
| 25-34 years                                  | 633 (55.7)                              | 96 (44.9)                                 | <b>1.56 (1.14, 2.13)</b> | <b>0.005</b> |                      | 1.05 (0.65, 1.72) | 0.830                | 1.21 (0.87, 1.68) | 0.257                |         |
| 35-45 years                                  | 82 (7.2)                                | 19 (8.9)                                  | 1.99 (0.57, 1.72)        | 0.964        |                      | 0.71 (0.32, 1.57) | 0.393                | 0.76 (0.42, 1.38) | 0.368                |         |
| No of previous pregnancies                   |                                         |                                           |                          |              |                      |                   |                      |                   |                      |         |
| One (ref)                                    | 354 (31.1)                              | 76 (35.7)                                 | 1                        |              |                      | 1                 |                      |                   |                      |         |
| Two                                          | 312 (27.4)                              | 54 (25.4)                                 | 1.25 (0.85, 1.84)        | 0.249        |                      | 1.16 (0.73, 1.86) | 0.522                |                   |                      |         |
| Three                                        | 222 (19.5)                              | 34 (16.0)                                 | 1.40 (0.90, 2.18)        | 0.133        |                      | 1.31 (0.71, 2.42) | 0.383                |                   |                      |         |
| Four or more                                 | 250 (22.0)                              | 49 (23.0)                                 | 1.09 (0.73, 1.62)        | 0.670        |                      | 1.10 (0.58, 2.08) | 0.767                |                   |                      |         |

| Indicators                                    | Yes - fed fruits and veg (N=1138) n (%) | No - not fed fruits and veg (N=214) n (%) | Unadjusted OR (95% CI)   | p value          | Model 1 AOR (95% CI)     | p value          | Model 2 AOR (95% CI)     | p value          | Model 3 AOR (95% CI)     | p value          |
|-----------------------------------------------|-----------------------------------------|-------------------------------------------|--------------------------|------------------|--------------------------|------------------|--------------------------|------------------|--------------------------|------------------|
| Maternal education                            |                                         |                                           |                          |                  |                          |                  |                          |                  |                          |                  |
| Never went to school (ref)                    | 920 (80.8)                              | 177 (82.7)                                | 1                        |                  |                          |                  | 1                        |                  | 1                        |                  |
| Primary                                       | 82 (7.2)                                | 16 (7.5)                                  | 0.98 (0.56, 1.73)        | 0.957            |                          |                  | 0.80 (0.43, 1.46)        | 0.464            | 0.95 (0.52, 1.73)        | 0.870            |
| Secondary or above                            | 136 (12.0)                              | 21 (9.8)                                  | 1.24 (0.76, 2.03)        | 0.388            |                          |                  | 1.16 (0.67, 1.99)        | 0.600            | 1.23 (0.73, 2.05)        | 0.437            |
| Father's education                            |                                         |                                           |                          |                  |                          |                  |                          |                  |                          |                  |
| Never went to school (ref)                    | 722 (63.4)                              | 145 (67.8)                                | 1                        |                  |                          |                  | 1                        |                  |                          |                  |
| Primary                                       | 137 (12.0)                              | 24 (11.2)                                 | 1.14 (0.71, 1.83)        | 0.597            |                          |                  | 1.04 (0.63, 1.73)        | 0.871            |                          |                  |
| Secondary or above                            | 279 (24.5)                              | 45 (21.0)                                 | 1.26 (0.88, 1.82)        | 0.212            |                          |                  | 1.47 (0.96, 2.24)        | 0.075            |                          |                  |
| Antenatal visits                              |                                         |                                           |                          |                  |                          |                  |                          |                  |                          |                  |
| None (ref)                                    | 364 (32.0)                              | 71 (33.2)                                 | 1                        |                  |                          |                  |                          |                  |                          |                  |
| 1-3 visits                                    | 550 (48.3)                              | 92 (43.0)                                 | 1.18 (0.84, 1.66)        | 0.351            |                          |                  |                          |                  |                          |                  |
| 4+ visits                                     | 224 (19.7)                              | 51 (23.8)                                 | 0.85 (0.57, 1.28)        | 0.441            |                          |                  |                          |                  |                          |                  |
| Place of delivery                             |                                         |                                           |                          |                  |                          |                  |                          |                  |                          |                  |
| Home (ref)                                    | 877 (78.6)                              | 161 (76.7)                                | 1                        |                  |                          |                  |                          |                  |                          |                  |
| Health facility                               | 239 (21.4)                              | 49 (23.3)                                 | 0.89 (0.62, 1.27)        | 0.515            |                          |                  |                          |                  |                          |                  |
| <b>CHILD CHARACTERISTICS</b>                  |                                         |                                           |                          |                  |                          |                  |                          |                  |                          |                  |
| Child sex                                     |                                         |                                           |                          |                  |                          |                  |                          |                  |                          |                  |
| Male (ref)                                    | 604 (53.1)                              | 119 (55.6)                                | 1                        |                  |                          | 1                | 1                        |                  | 1                        |                  |
| Female                                        | 534 (46.9)                              | 95 (44.4)                                 | 1.13 (0.83, 1.52)        | 0.439            | 1.23 (0.90, 1.68)        | 0.203            | 1.25 (0.91, 1.72)        | 0.160            | 1.23 (0.90, 1.69)        | 0.188            |
| Child age group in months at follow-up survey |                                         |                                           |                          |                  |                          |                  |                          |                  |                          |                  |
| 7 to 24                                       | 307 (27.0)                              | 130 (60.7)                                | <b>0.20 (0.13, 0.28)</b> | <b>&lt;0.001</b> | <b>0.20 (0.13, 0.29)</b> | <b>&lt;0.001</b> | <b>0.19 (0.13, 0.28)</b> | <b>&lt;0.001</b> | <b>0.20 (0.13, 0.29)</b> | <b>&lt;0.001</b> |
| 25 to 42                                      | 321 (28.2)                              | 41 (19.2)                                 | 0.66 (0.42, 1.04)        | 0.073            | 0.65 (0.41, 1.03)        | 0.068            | 0.65 (0.41, 1.03)        | 0.069            | 0.67 (0.43, 1.06)        | 0.090            |
| 43 to 59 (ref)                                | 510 (44.8)                              | 43 (20.1)                                 | 1                        |                  | 1                        |                  | 1                        |                  | 1                        |                  |

For interpretation purposes, a OR >1 indicates children are more likely to eat fruits/ vegetables and OR<1 indicates children are less likely.

Model 1 (N= 1331) included child sex, child age, trial allocation as a priori covariates plus migration, HH size from unadjusted analysis with a p<0.2.

Model 2 (N=1350) included maternal age, maternal education, child sex, child age, trial allocation as a priori covariates plus parity from unadjusted analysis with a p<0.2.

Model 3 (N=1351) included maternal age, maternal education, child sex, child age, trial allocation as covariates.

Abbreviation: OR Odds Ratio, AOR Adjusted Odds Ratio
