# Supplementary material for: Feeding, caregiving practices, and developmental delay among children under five in lowland Nepal: a community-based cross-sectional survey
Source: Springer Nature journal article supplement (doi:10.1186/s12889-022-13776-8), 2022-09-10
Supplement: MOESM6 [file 23474036]

**Supplementary table 12: Multivariable logistic regression analysis of factors associated with access to three or more books among children aged 7-59**

| Indicators                                   | Have access<br>(N=93)<br>n (%) | Do not have access<br>(N=1259)<br>n (%) | Unadjusted<br>OR (95% CI) | p value      | Model 1<br>AOR (95% CI) | p value | Model 2<br>AOR (95% CI) | p value | Model 3<br>AOR (95% CI) | p value |
|----------------------------------------------|--------------------------------|-----------------------------------------|---------------------------|--------------|-------------------------|---------|-------------------------|---------|-------------------------|---------|
| <b>HOUSEHOLD CHARACTERISTICS</b>             |                                |                                         |                           |              |                         |         |                         |         |                         |         |
| Wealth Quintile                              |                                |                                         |                           |              |                         |         |                         |         |                         |         |
| Lowest (ref)                                 | 17 (7.0)                       | 226 (93.0)                              |                           | 1            |                         | 1       |                         | 1       |                         | 1       |
| Second                                       | 11 (4.2)                       | 249 (95.8)                              | 0.66 (0.25, 1.73)         | 0.394        | 0.86 (0.29, 2.53)       | 0.780   | 0.52 (0.18, 1.51)       | 0.230   | 0.57 (0.20, 1.58)       | 0.277   |
| Middle                                       | 13 (4.5)                       | 279 (95.5)                              | 0.63 (0.25, 1.55)         | 0.310        | 0.78 (0.26, 2.30)       | 0.654   | 0.45 (0.16, 1.28)       | 0.134   | 0.47 (0.17, 1.29)       | 0.145   |
| Fourth                                       | 15 (6.2)                       | 228 (93.8)                              | 1.08 (0.44, 2.66)         | 0.874        | 1.24 (0.38, 4.01)       | 0.723   | 0.77 (0.26, 2.23)       | 0.626   | 0.84 (0.30, 2.31)       | 0.732   |
| Highest                                      | 34 (13.0)                      | 227 (87.0)                              | 2.13 (0.94, 4.80)         | 0.068        | 2.66 (0.87, 8.17)       | 0.087   | 1.55 (0.59, 4.06)       | 0.376   | 1.69 (0.68, 4.22)       | 0.258   |
| Months of adequate food provisioning (MAHFP) |                                |                                         |                           |              |                         |         |                         |         |                         |         |
| For up to 7 months                           | 13 (7.7)                       | 156 (92.3)                              | 1.13 (0.49, 2.63)         | 0.775        | 2.51 (0.84, 7.48)       | 0.099   |                         |         |                         |         |
| For 8 to 11 months                           | 13 (4.2)                       | 299 (95.8)                              | <b>0.31 (0.14, 0.68)</b>  | <b>0.003</b> | 0.42 (0.16, 1.08)       | 0.073   |                         |         |                         |         |
| For 12 months (ref)                          | 66 (7.7)                       | 799 (92.3)                              |                           | 1            |                         | 1       |                         |         |                         |         |
| Migration of at least one household member   |                                |                                         |                           |              |                         |         |                         |         |                         |         |
| No (ref)                                     | 53 (8.1)                       | 601 (91.9)                              |                           | 1            |                         | 1       |                         |         |                         |         |
| Yes                                          | 40 (5.8)                       | 649 (94.2)                              | 0.58 (0.33, 1.01)         | 0.055        | 0.60 (0.32, 1.11)       | 0.103   |                         |         |                         |         |
| Household size                               |                                |                                         |                           |              |                         |         |                         |         |                         |         |
| 1-5 members                                  | 25 (8.0)                       | 286 (92.0)                              | 1.02 (0.55, 1.90)         | 0.957        |                         |         |                         |         |                         |         |
| 6-10 members (ref)                           | 57 (7.1)                       | 749 (92.9)                              |                           | 1            |                         |         |                         |         |                         |         |
| >=11 members                                 | 10 (4.5)                       | 213 (95.5)                              | 0.63 (0.27, 1.47)         | 0.284        |                         |         |                         |         |                         |         |
| Health care access                           |                                |                                         |                           |              |                         |         |                         |         |                         |         |
| No (ref)                                     | 75 (7.0)                       | 1002 (93.0)                             |                           | 1            |                         |         |                         |         |                         |         |
| Yes                                          | 14 (8.1)                       | 159 (91.9)                              | 0.89 (0.41, 1.92)         | 0.759        |                         |         |                         |         |                         |         |
| Ethnicity/Caste                              |                                |                                         |                           |              |                         |         |                         |         |                         |         |
| Dalit/ Muslim (ref)                          | 21 (5.0)                       | 397 (95.0)                              |                           | 1            |                         | 1       |                         |         |                         |         |
| Janjati/other terai caste                    | 39 (6.1)                       | 600 (93.9)                              | 1.51 (0.77, 2.99)         | 0.233        | 1.31 (0.59, 2.87)       | 0.507   |                         |         |                         |         |
| Yadav/ Brahmin                               | 33 (11.2)                      | 262 (88.8)                              | <b>2.20 (1.05, 4.61)</b>  | <b>0.037</b> | 1.87 (0.75, 4.66)       | 0.182   |                         |         |                         |         |
| Religion                                     |                                |                                         |                           |              |                         |         |                         |         |                         |         |
| Non-Hindu                                    | 12 (7.6)                       | 146 (92.4)                              | 1.24 (0.55, 2.78)         | 0.602        |                         |         |                         |         |                         |         |
| Hindu (ref)                                  | 81 (6.8)                       | 1113 (93.2)                             |                           | 1            |                         |         |                         |         |                         |         |
| <b>PARENTAL CHARACTERISTICS</b>              |                                |                                         |                           |              |                         |         |                         |         |                         |         |
| Maternal age                                 |                                |                                         |                           |              |                         |         |                         |         |                         |         |
| 15-24 years (ref)                            | 37 (7.1)                       | 484 (92.9)                              |                           | 1            |                         |         | 1                       |         |                         |         |
| 25-34 years                                  | 53 (7.3)                       | 676 (92.7)                              | 1.04 (0.60, 1.79)         | 0.902        |                         |         | 1.40 (0.71, 2.73)       | 0.328   |                         |         |
| 35-45 years                                  | 3 (3.0)                        | 98 (97.0)                               | 0.39 (0.10, 1.56)         | 0.182        |                         |         | 0.63 (0.11, 3.62)       | 0.601   |                         |         |
| No of previous pregnancies                   |                                |                                         |                           |              |                         |         |                         |         |                         |         |
| One (ref)                                    | 33 (7.7)                       | 397 (92.3)                              |                           | 1            |                         |         |                         |         |                         |         |
| Two                                          | 25 (6.8)                       | 341 (93.2)                              | 0.86 (0.43, 1.71)         | 0.670        |                         |         |                         |         |                         |         |
| Three                                        | 21 (8.2)                       | 235 (91.8)                              | 1.09 (0.52, 2.26)         | 0.825        |                         |         |                         |         |                         |         |
| Four or more                                 | 14 (4.7)                       | 285 (95.3)                              | 0.62 (0.28, 1.35)         | 0.228        |                         |         |                         |         |                         |         |

| Indicators                                           | Have access<br>(N=93)<br>n (%) | Do not have access<br>(N=1259)<br>n (%) | Unadjusted<br>OR (95% CI) | p value      | Model 1<br>AOR (95% CI)  | p value          | Model 2<br>AOR (95% CI)  | p value      | Model 3<br>AOR (95% CI)  | p value      |
|------------------------------------------------------|--------------------------------|-----------------------------------------|---------------------------|--------------|--------------------------|------------------|--------------------------|--------------|--------------------------|--------------|
| <b>Maternal education</b>                            |                                |                                         |                           |              |                          |                  |                          |              |                          |              |
| Never went to school (ref)                           | 66 (6.0)                       | 1031 (94.0)                             |                           | 1            |                          |                  | 1                        |              | 1                        |              |
| Primary                                              | 8 (8.2)                        | 90 (91.8)                               | 1.36 (0.51, 3.59)         | 0.535        |                          |                  | 1.08 (0.37, 3.17)        | 0.895        | 1.04 (0.35, 3.04)        | 0.947        |
| Secondary or above                                   | 19 (12.1)                      | 138 (87.9)                              | <b>2.61 (1.26, 5.42)</b>  | <b>0.010</b> |                          |                  | <b>2.86 (1.22, 6.70)</b> | <b>0.015</b> | <b>2.55 (1.11, 5.85)</b> | <b>0.027</b> |
| <b>Father's education</b>                            |                                |                                         |                           |              |                          |                  |                          |              |                          |              |
| Never went to school (ref)                           | 59 (6.8)                       | 808 (93.2)                              |                           | 1            |                          |                  |                          |              |                          |              |
| Primary                                              | 11 (6.8)                       | 150 (93.2)                              | 0.83 (0.36, 1.96)         | 0.677        |                          |                  |                          |              |                          |              |
| Secondary or above                                   | 23 (7.1)                       | 301 (92.9)                              | 0.75 (0.40, 1.41)         | 0.376        |                          |                  |                          |              |                          |              |
| <b>Antenatal visits</b>                              |                                |                                         |                           |              |                          |                  |                          |              |                          |              |
| None (ref)                                           | 20 (4.6)                       | 415 (95.4)                              |                           | 1            |                          |                  | 1                        |              | 1                        |              |
| 1-3 visits                                           | 40 (6.2)                       | 602 (93.8)                              | 1.61 (0.83, 3.16)         | 0.162        |                          |                  | 1.47 (0.67, 3.20)        | 0.332        | 1.50 (0.70, 3.19)        | 0.297        |
| 4+ visits                                            | 33 (12.0)                      | 242 (88.0)                              | <b>2.89 (1.39, 6.00)</b>  | <b>0.005</b> |                          |                  | <b>3.21 (1.33, 7.76)</b> | <b>0.010</b> | <b>3.05 (1.32, 7.07)</b> | <b>0.009</b> |
| <b>Place of delivery</b>                             |                                |                                         |                           |              |                          |                  |                          |              |                          |              |
| Home (ref)                                           | 55 (5.3)                       | 983 (94.7)                              |                           | 1            |                          |                  | 1                        |              |                          |              |
| Health facility                                      | 35 (12.2)                      | 253 (87.8)                              | 1.63 (0.91, 2.91)         | 0.102        |                          |                  | 1.08 (0.53, 2.23)        | 0.828        |                          |              |
| <b>CHILD CHARACTERISTICS</b>                         |                                |                                         |                           |              |                          |                  |                          |              |                          |              |
| <b>Child sex</b>                                     |                                |                                         |                           |              |                          |                  |                          |              |                          |              |
| Male (ref)                                           | 40 (5.5)                       | 683 (94.5)                              |                           | 1            |                          | 1                | 1                        |              | 1                        |              |
| Female                                               | 53 (8.4)                       | 576 (91.6)                              | 1.74 (1.02, 2.97)         | 0.043        | 1.93 (1.06, 3.52)        | 0.032            | 1.74 (0.94, 3.20)        | 0.076        | 1.81 (1.00, 3.29)        | 0.052        |
| <b>Child age group in months at follow-up survey</b> |                                |                                         |                           |              |                          |                  |                          |              |                          |              |
| 7 to 24                                              | 37 (8.5)                       | 400 (91.5)                              | 1.15 (0.63, 2.08)         | 0.655        | 0.84 (0.43, 1.64)        | 0.603            | 1.10 (0.55, 2.20)        | 0.791        | 1.00 (0.52, 1.93)        | 0.999        |
| 25 to 42                                             | 14 (3.9)                       | 348 (96.1)                              | <b>0.30 (1.38, 0.65)</b>  | <b>0.002</b> | <b>0.21 (0.09, 0.50)</b> | <b>&lt;0.001</b> | <b>0.23 (0.10, 0.54)</b> | <b>0.001</b> | <b>0.24 (0.10, 0.55)</b> | <b>0.001</b> |
| 43 to 59 (ref)                                       | 42 (7.6)                       | 511 (92.4)                              |                           | 1            |                          | 1                | 1                        |              | 1                        |              |

For interpretation purposes, OR >1 indicates children are more likely to have access to three or more books and OR<1 indicates children are less likely.

Model 1 (N= 1295) included wealth quintile, child sex, child age, trial allocation as a priori covariates plus MAHFP, migration of HH members, ethnicity from unadjusted analysis with a p<0.2.

Model 2 (N=1274) included wealth quintile, maternal education, child sex, child age, trial allocation as a priori covariates plus maternal age, antenatal visits, place of delivery from unadjusted analysis with a p<0.2.

Model 3 (N=1299) included wealth quintile, maternal education, child sex, child age, trial allocation as a priori covariates plus, antenatal visits from Model 2 with p<0.05.

Abbreviation: OR Odds Ratio, AOR Adjusted Odds Ratio

**Supplementary table 13: Multivariable logistic regression analysis of factors associated with access to two or more toys among children aged 7-59**

| Indicators                                   | Have access<br>(N=865)<br>n (%) | Do not have access<br>(N=487)<br>n (%) | Unadjusted<br>OR (95% CI) | p value      | Model 1<br>AOR (95% CI)  | p value      | Model 2<br>AOR (95% CI)  | p value      |
|----------------------------------------------|---------------------------------|----------------------------------------|---------------------------|--------------|--------------------------|--------------|--------------------------|--------------|
| <b>HOUSEHOLD CHARACTERISTICS</b>             |                                 |                                        |                           |              |                          |              |                          |              |
| Wealth Quintile                              |                                 |                                        |                           |              |                          |              |                          |              |
| Lowest (ref)                                 | 134 (55.1)                      | 109 (44.9)                             | 1                         |              | 1                        |              | 1                        |              |
| Second                                       | 167 (64.2)                      | 93 (35.8)                              | <b>1.53 (1.02, 2.30)</b>  | <b>0.040</b> | <b>1.58 (1.03, 2.43)</b> | <b>0.037</b> | <b>1.53 (1.01, 2.32)</b> | <b>0.047</b> |
| Middle                                       | 194 (66.4)                      | 98 (33.6)                              | <b>1.81 (1.22, 2.69)</b>  | <b>0.003</b> | <b>1.92 (1.24, 2.97)</b> | <b>0.003</b> | <b>1.82 (1.21, 2.74)</b> | <b>0.004</b> |
| Fourth                                       | 160 (65.8)                      | 83 (34.2)                              | <b>1.84 (1.21, 2.80)</b>  | <b>0.004</b> | <b>1.98 (1.23, 3.19)</b> | <b>0.005</b> | <b>1.77 (1.14, 2.75)</b> | <b>0.010</b> |
| Highest                                      | 169 (64.8)                      | 92 (35.2)                              | <b>1.83 (1.21, 2.76)</b>  | <b>0.004</b> | <b>2.15 (1.32, 3.50)</b> | <b>0.002</b> | <b>1.77 (1.13, 2.76)</b> | <b>0.012</b> |
| Months of adequate food provisioning (MAHFP) |                                 |                                        |                           |              |                          |              |                          |              |
| For up to 7 months                           | 98 (58.0)                       | 71 (42.0)                              | <b>0.64 (0.43, 0.96)</b>  | <b>0.032</b> | 0.91 (0.56, 1.48)        | 0.710        |                          |              |
| For 8 to 11 months                           | 211 (67.6)                      | 101 (32.4)                             | 1.11 (0.80, 1.52)         | 0.534        | 1.23 (0.85, 1.76)        | 0.269        |                          |              |
| For 12 months (ref)                          | 553 (63.9)                      | 313 (36.1)                             | 1                         |              | 1                        |              |                          |              |
| Migration of at least one household member   |                                 |                                        |                           |              |                          |              |                          |              |
| No (ref)                                     | 417 (63.8)                      | 237 (36.2)                             | 1                         |              |                          |              |                          |              |
| Yes                                          | 443 (64.3)                      | 246 (35.7)                             | 0.99 (0.77, 1.28)         | 0.947        |                          |              |                          |              |
| Household size                               |                                 |                                        |                           |              |                          |              |                          |              |
| 1-5 members                                  | 193 (62.1)                      | 118 (37.9)                             | 0.89 (0.65, 1.20)         | 0.439        |                          |              |                          |              |
| 6-10 members (ref)                           | 516 (64.0)                      | 290 (36.0)                             | 1                         |              |                          |              |                          |              |
| >=11 members                                 | 147 (65.9)                      | 76 (34.1)                              | 1.04 (0.73, 1.48)         | 0.818        |                          |              |                          |              |
| Health care access                           |                                 |                                        |                           |              |                          |              |                          |              |
| No (ref)                                     | 675 (62.7)                      | 402 (37.3)                             | 1                         |              |                          |              |                          |              |
| Yes                                          | 116 (67.1)                      | 57 (32.9)                              | 1.18 (0.80, 1.74)         | 0.396        |                          |              |                          |              |
| Ethnicity/Caste                              |                                 |                                        |                           |              |                          |              |                          |              |
| Dalit/ Muslim (ref)                          | 265 (63.4)                      | 153 (36.6)                             | 1                         |              |                          |              |                          |              |
| Janjati/other terai caste                    | 414 (64.8)                      | 225 (35.2)                             | 0.99 (0.74, 1.34)         | 0.972        |                          |              |                          |              |
| Yadav/ Brahmin                               | 186 (63.1)                      | 109 (36.9)                             | 1.19 (0.83, 1.72)         | 0.338        |                          |              |                          |              |
| Religion                                     |                                 |                                        |                           |              |                          |              |                          |              |
| Non-Hindu                                    | 102 (64.6)                      | 56 (35.4)                              | 1.08 (0.72, 1.62)         | 0.695        |                          |              |                          |              |
| Hindu (ref)                                  | 763 (63.9)                      | 431 (36.1)                             | 1                         |              |                          |              |                          |              |
| <b>PARENTAL CHARACTERISTICS</b>              |                                 |                                        |                           |              |                          |              |                          |              |
| Maternal age                                 |                                 |                                        |                           |              |                          |              |                          |              |
| 15-24 years (ref)                            | 325 (62.4)                      | 196 (37.6)                             | 1                         |              |                          |              |                          |              |
| 25-34 years                                  | 475 (65.2)                      | 254 (34.8)                             | 1.07 (0.82, 1.39)         | 0.614        |                          |              |                          |              |
| 35-45 years                                  | 64 (63.4)                       | 37 (36.6)                              | 0.88 (0.53, 1.45)         | 0.609        |                          |              |                          |              |
| No of previous pregnancies                   |                                 |                                        |                           |              |                          |              |                          |              |
| One (ref)                                    | 267 (62.1)                      | 163 (37.9)                             | 1                         |              |                          |              |                          |              |
| Two                                          | 243 (66.4)                      | 123 (33.6)                             | 1.15 (0.83, 1.60)         | 0.405        |                          |              |                          |              |
| Three                                        | 157 (61.3)                      | 99 (38.7)                              | 0.85 (0.59, 1.21)         | 0.362        |                          |              |                          |              |
| Four or more                                 | 197 (65.9)                      | 102 (34.1)                             | 1.04 (0.73, 1.47)         | 0.833        |                          |              |                          |              |

| Indicators                                           | Have access<br>(N=865)<br>n (%) | Do not have access<br>(N=487)<br>n (%) | Unadjusted<br>OR (95% CI) | p value          | Model 1<br>AOR (95% CI)  | p value          | Model 2<br>AOR (95% CI)  | p value          |
|------------------------------------------------------|---------------------------------|----------------------------------------|---------------------------|------------------|--------------------------|------------------|--------------------------|------------------|
| <b>Maternal education</b>                            |                                 |                                        |                           |                  |                          |                  |                          |                  |
| Never went to school (ref)                           | 688 (62.7)                      | 409 (37.3)                             |                           | 1                |                          |                  |                          | 1                |
| Primary                                              | 67 (68.4)                       | 31 (31.6)                              | 1.21 (0.73, 1.99)         | 0.460            |                          |                  | 1.24 (0.74, 2.10)        | 0.414            |
| Secondary or above                                   | 110 (70.1)                      | 47 (29.9)                              | <b>1.57 (1.04, 2.35)</b>  | <b>0.030</b>     |                          |                  | 1.37 (0.88, 2.13)        | 0.158            |
| <b>Father's education</b>                            |                                 |                                        |                           |                  |                          |                  |                          |                  |
| Never went to school (ref)                           | 548 (63.2)                      | 319 (36.8)                             |                           | 1                |                          |                  |                          | 1                |
| Primary                                              | 101 (62.7)                      | 60 (37.3)                              | 1.01 (0.68, 1.50)         | 0.963            |                          |                  |                          |                  |
| Secondary or above                                   | 216 (66.7)                      | 108 (33.3)                             | 1.21 (0.90, 1.65)         | 0.210            |                          |                  |                          |                  |
| <b>Antenatal visits</b>                              |                                 |                                        |                           |                  |                          |                  |                          |                  |
| None (ref)                                           | 266 (61.1)                      | 169 (38.9)                             |                           | 1                |                          |                  |                          | 1                |
| 1-3 visits                                           | 422 (65.7)                      | 220 (34.3)                             | <b>1.43 (1.06, 1.91)</b>  | <b>0.018</b>     |                          |                  | <b>1.38 (1.02, 1.88)</b> | <b>0.040</b>     |
| 4+ visits                                            | 177 (64.4)                      | 98 (35.6)                              | 1.21 (0.85, 1.74)         | 0.291            |                          |                  | 1.17 (0.79, 1.72)        | 0.427            |
| <b>Place of delivery</b>                             |                                 |                                        |                           |                  |                          |                  |                          |                  |
| Home (ref)                                           | 672 (64.7)                      | 366 (35.3)                             |                           | 1                |                          |                  |                          | 1                |
| Health facility                                      | 177 (61.5)                      | 111 (38.5)                             | 0.86 (0.63, 1.17)         | 0.345            |                          |                  |                          |                  |
| <b>CHILD CHARACTERISTICS</b>                         |                                 |                                        |                           |                  |                          |                  |                          |                  |
| <b>Child sex</b>                                     |                                 |                                        |                           |                  |                          |                  |                          |                  |
| Male (ref)                                           | 474 (65.6)                      | 249 (34.4)                             |                           | 1                |                          | 1                |                          | 1                |
| Female                                               | 391 (62.2)                      | 238 (37.8)                             | <b>0.73 (0.57, 0.94)</b>  | <b>0.016</b>     | <b>0.73 (0.56, 0.95)</b> | <b>0.019</b>     | <b>0.72 (0.55, 0.94)</b> | <b>0.014</b>     |
| <b>Child age group in months at follow-up survey</b> |                                 |                                        |                           |                  |                          |                  |                          |                  |
| 7 to 24                                              | 245 (56.1)                      | 192 (43.9)                             | <b>0.50 (0.37, 0.67)</b>  | <b>&lt;0.001</b> | <b>0.48 (0.35, 0.66)</b> | <b>&lt;0.001</b> | <b>0.49 (0.36, 0.66)</b> | <b>&lt;0.001</b> |
| 25 to 42                                             | 239 (66.0)                      | 123 (34.0)                             | 0.87 (0.64, 1.20)         | 0.408            | 0.86 (0.62, 1.19)        | 0.365            | 0.87 (0.62, 1.20)        | 0.392            |
| 43 to 59 (ref)                                       | 381 (68.9)                      | 172 (31.1)                             |                           | 1                |                          | 1                |                          | 1                |

For interpretation purposes, OR >1 indicates children are more likely to have access to two or more toys and OR<1 indicates children are less likely.

Model 1 (N= 1295) included wealth quintile, child sex, child age, trial allocation as a priori covariates plus MAHFP covariates from unadjusted analysis with a p<0.2.

Model 2 (N=1299) included wealth quintile, maternal education, child sex, child age, trial allocation as a priori covariates plus antenatal visits from unadjusted analysis with a p<0.2.

Abbreviation: OR Odds Ratio, AOR Adjusted Odds Ratio

**Supplementary table 14: Multivariable logistic regression analysis of factors associated with early stimulation and responsive caregiving by mother/father/other adults to children aged 24-59 months**

| Indicators                                   | Yes-<br>receive<br>stimulation<br>(N=136)<br>n (%) | No- did not<br>receive<br>(N=804)<br>n (%) | Unadjusted<br>OR (95% CI) | p value      | Model 1<br>AOR (95% CI)  | p value      | Model 2<br>AOR (95% CI)  | p value      |
|----------------------------------------------|----------------------------------------------------|--------------------------------------------|---------------------------|--------------|--------------------------|--------------|--------------------------|--------------|
| <b>HOUSEHOLD CHARACTERISTICS</b>             |                                                    |                                            |                           |              |                          |              |                          |              |
| Wealth Quintile                              |                                                    |                                            |                           |              |                          |              |                          |              |
| Lowest (ref)                                 | 19 (10.6)                                          | 160 (89.4)                                 |                           | 1            |                          | 1            |                          | 1            |
| Second                                       | 30 (16.5)                                          | 152 (83.5)                                 | 1.49 (0.73, 3.04)         | 0.270        | 1.66 (0.73, 3.74)        | 0.225        | 1.77 (0.78, 3.98)        | 0.169        |
| Middle                                       | 25 (12.4)                                          | 177 (87.6)                                 | 1.02 (0.50, 2.11)         | 0.950        | 1.34 (0.57, 3.16)        | 0.501        | 1.24 (0.53, 2.90)        | 0.613        |
| Fourth                                       | 19 (11.2)                                          | 150 (88.8)                                 | 1.11 (0.52, 2.39)         | 0.782        | 1.53 (0.62, 3.82)        | 0.358        | 1.50 (0.61, 3.67)        | 0.375        |
| Highest                                      | 34 (20.4)                                          | 133 (79.6)                                 | <b>2.20 (1.09, 4.43)</b>  | <b>0.028</b> | 2.35 (0.96, 5.77)        | 0.062        | 2.13 (0.87, 5.22)        | 0.100        |
| Months of adequate food provisioning (MAHFP) |                                                    |                                            |                           |              |                          |              |                          |              |
| For up to 7 months                           | 12 (9.9)                                           | 109 (90.1)                                 | 0.66 (0.32, 1.39)         | 0.273        |                          |              |                          |              |
| For 8 to 11 months                           | 39 (16.6)                                          | 196 (83.4)                                 | 1.12 (0.68, 1.84)         | 0.656        |                          |              |                          |              |
| For 12 months (ref)                          | 84 (14.5)                                          | 496 (85.5)                                 |                           | 1            |                          |              |                          |              |
| Migration of at least one household member   |                                                    |                                            |                           |              |                          |              |                          |              |
| No (ref)                                     | 79 (16.7)                                          | 393 (83.3)                                 |                           | 1            |                          | 1            |                          | 1            |
| Yes                                          | 57 (12.3)                                          | 407 (87.7)                                 | <b>0.47 (0.30, 0.74)</b>  | <b>0.001</b> | <b>0.55 (0.33, 0.94)</b> | <b>0.028</b> | <b>0.52 (0.31, 0.90)</b> | <b>0.019</b> |
| Household size                               |                                                    |                                            |                           |              |                          |              |                          |              |
| 1-5 members                                  | 36 (16.7)                                          | 179 (83.3)                                 | 1.17 (0.71, 1.91)         | 0.539        | 1.44 (0.81, 2.58)        | 0.214        | 1.45 (0.81, 2.61)        | 0.214        |
| 6-10 members (ref)                           | 81 (14.0)                                          | 496 (86.0)                                 |                           | 1            |                          | 1            |                          | 1            |
| >=11 members                                 | 16 (11.7)                                          | 121 (88.3)                                 | 0.58 (0.30, 1.12)         | 0.107        | <b>0.42 (0.18, 0.95)</b> | <b>0.037</b> | <b>0.41 (0.18, 0.94)</b> | <b>0.036</b> |
| Health care access                           |                                                    |                                            |                           |              |                          |              |                          |              |
| No (ref)                                     | 96 (13.1)                                          | 637 (86.9)                                 |                           | 1            |                          | 1            |                          | 1            |
| Yes                                          | 25 (21.9)                                          | 89 (78.1)                                  | <b>1.89 (1.04, 3.43)</b>  | <b>0.035</b> | <b>2.10 (1.04, 4.22)</b> | <b>0.038</b> | <b>2.04 (1.01, 4.13)</b> | <b>0.048</b> |
| Ethnicity/Caste                              |                                                    |                                            |                           |              |                          |              |                          |              |
| Dalit/ Muslim (ref)                          | 33 (11.6)                                          | 251 (88.4)                                 |                           | 1            |                          | 1            |                          | 1            |
| Janjati/other terai caste                    | 73 (16.1)                                          | 380 (83.9)                                 | <b>1.75 (1.05, 2.92)</b>  | <b>0.033</b> | 1.49 (0.72, 3.09)        | 0.281        |                          |              |
| Yadav/ Brahmin                               | 30 (14.8)                                          | 173 (85.2)                                 | 1.83 (0.99, 3.41)         | 0.056        | 1.61 (0.66, 3.90)        | 0.294        |                          |              |
| Religion                                     |                                                    |                                            |                           |              |                          |              |                          |              |
| Non-Hindu                                    | 12 (10.7)                                          | 100 (89.3)                                 | 0.57 (0.28, 1.17)         | 0.126        | 1.24 (0.45, 3.39)        | 0.678        |                          |              |
| Hindu (ref)                                  | 124 (15.0)                                         | 704 (85.0)                                 |                           | 1            |                          | 1            |                          | 1            |
| <b>PARENTAL CHARACTERISTICS</b>              |                                                    |                                            |                           |              |                          |              |                          |              |
| Maternal age                                 |                                                    |                                            |                           |              |                          |              |                          |              |
| 15-24 years (ref)                            | 37 (11.5)                                          | 286 (88.5)                                 |                           | 1            |                          |              |                          | 1            |
| 25-34 years                                  | 90 (16.5)                                          | 454 (83.5)                                 | 1.52 (0.95, 2.41)         | 0.080        |                          |              | <b>1.82 (1.03, 3.21)</b> | <b>0.040</b> |
| 35-45 years                                  | 9 (12.5)                                           | 63 (87.5)                                  | 1.02 (0.42, 2.48)         | 0.965        |                          |              | 1.42 (0.49, 4.12)        | 0.521        |
| No of previous pregnancies                   |                                                    |                                            |                           |              |                          |              |                          |              |
| One (ref)                                    | 38 (13.0)                                          | 254 (87.0)                                 |                           | 1            |                          |              |                          | 1            |
| Two                                          | 39 (14.9)                                          | 222 (85.1)                                 | 0.98 (0.56, 1.72)         | 0.956        |                          |              |                          |              |
| Three                                        | 27 (15.3)                                          | 150 (84.7)                                 | 1.04 (0.57, 1.91)         | 0.892        |                          |              |                          |              |
| Four or more                                 | 32 (15.3)                                          | 177 (84.7)                                 | 0.99 (0.55, 1.78)         | 0.986        |                          |              |                          |              |

| Indicators                                           | Yes-<br>receive<br>stimulation<br>(N=136)<br>n (%) | No- did not<br>receive<br>(N=804)<br>n (%) | Unadjusted<br>OR (95% CI) | p value          | Model 1<br>AOR (95% CI)  | p value      | Model 2<br>AOR (95% CI)  | p value      |
|------------------------------------------------------|----------------------------------------------------|--------------------------------------------|---------------------------|------------------|--------------------------|--------------|--------------------------|--------------|
| <b>Maternal education</b>                            |                                                    |                                            |                           |                  |                          |              |                          |              |
| Never went to school (ref)                           | 97 (12.8)                                          | 660 (87.2)                                 |                           | 1                |                          |              | 1                        |              |
| Primary                                              | 18 (26.1)                                          | 51 (73.9)                                  | <b>2.35 (1.17, 4.71)</b>  | <b>0.016</b>     |                          |              | <b>3.12 (1.34, 7.27)</b> | <b>0.008</b> |
| Secondary or above                                   | 21 (18.4)                                          | 93 (81.6)                                  | <b>2.13 (1.15, 3.96)</b>  | <b>0.017</b>     |                          |              | 1.78 (0.81, 3.91)        | 0.148        |
| <b>Father's education</b>                            |                                                    |                                            |                           |                  |                          |              |                          |              |
| Never went to school (ref)                           | 85 (14.2)                                          | 512 (85.8)                                 |                           | 1                |                          |              |                          |              |
| Primary                                              | 18 (15.8)                                          | 96 (84.2)                                  | 1.41 (0.73, 2.72)         | 0.311            |                          |              |                          |              |
| Secondary or above                                   | 33 (14.4)                                          | 196 (85.6)                                 | 1.02 (0.62, 1.69)         | 0.940            |                          |              |                          |              |
| <b>Antenatal visits</b>                              |                                                    |                                            |                           |                  |                          |              |                          |              |
| None (ref)                                           | 43 (13.8)                                          | 268 (86.2)                                 |                           | 1                |                          |              |                          |              |
| 1-3 visits                                           | 68 (15.1)                                          | 382 (84.9)                                 | 1.21 (0.74, 1.96)         | 0.448            |                          |              |                          |              |
| 4+ visits                                            | 25 (14.0)                                          | 154 (86.0)                                 | 1.10 (0.59, 2.04)         | 0.757            |                          |              |                          |              |
| <b>Place of delivery</b>                             |                                                    |                                            |                           |                  |                          |              |                          |              |
| Home (ref)                                           | 108 (14.4)                                         | 643 (85.6)                                 |                           | 1                |                          |              |                          |              |
| Health facility                                      | 24 (14.1)                                          | 146 (85.9)                                 | 1.11 (0.64, 1.93)         | 0.716            |                          |              |                          |              |
| <b>CHILD CHARACTERISTICS</b>                         |                                                    |                                            |                           |                  |                          |              |                          |              |
| <b>Child sex</b>                                     |                                                    |                                            |                           |                  |                          |              |                          |              |
| Male (ref)                                           | 71 (13.8)                                          | 444 (86.2)                                 |                           | 1                |                          | 1            |                          | 1            |
| Female                                               | 65 (15.3)                                          | 360 (84.7)                                 | 0.93 (0.61, 1.42)         | 0.731            | 1.07 (0.64, 1.78)        | 0.809        | 1.05 (0.63, 1.76)        | 0.856        |
| <b>Child age group in months at follow-up survey</b> |                                                    |                                            |                           |                  |                          |              |                          |              |
| 24 to 35 (ref)                                       | 21 (9.6)                                           | 198 (90.4)                                 |                           | 1                |                          | 1            |                          | 1            |
| 36 to 47                                             | 31 (10.3)                                          | 269 (89.7)                                 | 1.18 (0.62, 2.26)         | 0.614            | 1.41 (0.68, 2.92)        | 0.351        | 1.23 (0.58, 2.57)        | 0.590        |
| 49 to 59                                             | 84 (20.0)                                          | 337 (80.0)                                 | <b>2.81 (1.58, 5.00)</b>  | <b>&lt;0.001</b> | <b>3.30 (1.68, 6.47)</b> | <b>0.001</b> | <b>2.76 (1.40, 5.45)</b> | <b>0.004</b> |

For interpretation purposes, OR >1 indicates children are more likely to have received early stimulation and responsive caregiving by mother/father/other adults and OR<1 indicates children are less likely.

Model 1 (N= 809) included wealth quintile, child sex, child age, trial allocation as a priori covariates plus migration of HH member, HH size, health care access, ethnicity, religion from unadjusted analysis with a p<0.2.

Model 2 (N=809) included wealth quintile, maternal education, child sex, child age, trial allocation as a priori covariates plus maternal age from unadjusted analysis with a p<0.2. plus, migration of HH member, HH size, health care access from Model 1 with p<0.05.

Abbreviation: OR Odds Ratio, AOR Adjusted Odds Ratio

**Supplementary table 15: Multivariable logistic regression analysis of factors associated with adequate supervision of children aged 7-59 months**

| Indicators                                   | Yes-received adequate supervision (N=916) n (%) | No- did not receive (N=383) n (%) | Unadjusted OR (95% CI)   | p value          | Model 1 AOR (95% CI)     | p value      | Model 2 AOR (95% CI)     | p value          | Model 3 AOR (95% CI)     | p value          |
|----------------------------------------------|-------------------------------------------------|-----------------------------------|--------------------------|------------------|--------------------------|--------------|--------------------------|------------------|--------------------------|------------------|
| <b>HOUSEHOLD CHARACTERISTICS</b>             |                                                 |                                   |                          |                  |                          |              |                          |                  |                          |                  |
| Wealth Quintile                              |                                                 |                                   |                          |                  |                          |              |                          |                  |                          |                  |
| Lowest (ref)                                 | 142 (61.7)                                      | 88 (38.3)                         | 1                        |                  | 1                        |              | 1                        |                  | 1                        |                  |
| Second                                       | 176 (69.0)                                      | 79 (31.0)                         | 1.41 (0.94, 2.11)        | 0.092            | 1.30 (0.85, 1.99)        | 0.228        | 1.24 (0.81, 1.90)        | 0.325            | 1.25 (0.82, 1.91)        | 0.294            |
| Middle                                       | 199 (69.8)                                      | 86 (30.2)                         | 1.47 (1.00, 2.18)        | 0.052            | 1.27 (0.82, 1.97)        | 0.292        | 1.18 (0.78, 1.80)        | 0.436            | 1.19 (0.79, 1.79)        | 0.415            |
| Fourth                                       | 169 (72.2)                                      | 65 (27.8)                         | <b>1.69 (1.11, 2.56)</b> | <b>0.014</b>     | 1.37 (0.84, 2.24)        | 0.204        | 1.12 (0.70, 1.79)        | 0.644            | 1.17 (0.75, 1.83)        | 0.498            |
| Highest                                      | 189 (78.1)                                      | 53 (21.9)                         | <b>2.43 (1.58, 3.74)</b> | <b>&lt;0.001</b> | <b>1.99 (1.17, 3.38)</b> | <b>0.011</b> | 1.57 (0.94, 2.63)        | 0.082            | 1.46 (0.90, 2.38)        | 0.123            |
| Months of adequate food provisioning (MAHFP) |                                                 |                                   |                          |                  |                          |              |                          |                  |                          |                  |
| For up to 7 months                           | 103 (65.2)                                      | 55 (34.8)                         | 0.67 (0.45, 0.10)        | 0.045            | 1.07 (0.67, 1.71)        | 0.783        |                          |                  |                          |                  |
| For 8 to 11 months                           | 214 (70.4)                                      | 90 (29.6)                         | 0.88 (0.64, 1.21)        | 0.438            | 1.18 (0.82, 1.68)        | 0.368        |                          |                  |                          |                  |
| For 12 months (ref)                          | 597 (71.8)                                      | 235 (28.2)                        | 1                        |                  | 1                        |              |                          |                  |                          |                  |
| Migration of at least one household member   |                                                 |                                   |                          |                  |                          |              |                          |                  |                          |                  |
| No (ref)                                     | 441 (70.4)                                      | 185 (29.6)                        | 1                        |                  |                          |              |                          |                  |                          |                  |
| Yes                                          | 468 (70.5)                                      | 196 (29.5)                        | 0.99 (0.77, 1.27)        | 0.926            |                          |              |                          |                  |                          |                  |
| Household size                               |                                                 |                                   |                          |                  |                          |              |                          |                  |                          |                  |
| 1-5 members                                  | 185 (63.1)                                      | 108 (36.9)                        | <b>1.64 (0.47, 0.87)</b> | <b>0.004</b>     | <b>0.69 (0.50, 0.94)</b> | <b>0.020</b> | <b>0.57 (0.40, 0.80)</b> | <b>0.001</b>     | <b>0.57 (0.40, 0.79)</b> | <b>0.001</b>     |
| 6-10 members (ref)                           | 555 (71.5)                                      | 221 (28.5)                        | 1                        |                  | 1                        |              | 1                        |                  | 1                        |                  |
| >=11 members                                 | 168 (77.1)                                      | 50 (22.9)                         | 1.27 (0.88, 1.85)        | 0.194            | 1.02 (0.69, 1.51)        | 0.924        | 1.01 (0.68, 1.52)        | 0.945            | 1.01 (0.68, 1.50)        | 0.974            |
| Health care access                           |                                                 |                                   |                          |                  |                          |              |                          |                  |                          |                  |
| No (ref)                                     | 724 (69.8)                                      | 313 (30.2)                        | 1                        |                  |                          |              |                          |                  |                          |                  |
| Yes                                          | 124 (76.5)                                      | 38 (23.5)                         | 1.29 (0.86, 1.94)        | 0.217            |                          |              |                          |                  |                          |                  |
| Ethnicity/Caste                              |                                                 |                                   |                          |                  |                          |              |                          |                  |                          |                  |
| Dalit/ Muslim (ref)                          | 265 (65.8)                                      | 138 (34.2)                        | 1                        |                  | 1                        |              |                          |                  |                          |                  |
| Janjati/other terai caste                    | 447 (72.0)                                      | 174 (28.0)                        | 1.46 (1.09, 1.96)        | 0.011            | 1.35 (0.98, 1.86)        | 0.063        |                          |                  |                          |                  |
| Yadav/ Brahmin                               | 204 (74.2)                                      | 71 (25.8)                         | <b>1.61 (1.11, 2.33)</b> | <b>0.013</b>     | 1.46 (0.96, 2.21)        | 0.077        |                          |                  |                          |                  |
| Religion                                     |                                                 |                                   |                          |                  |                          |              |                          |                  |                          |                  |
| Non-Hindu                                    | 106 (70.7)                                      | 44 (29.3)                         | 0.94 (0.63, 1.41)        | 0.764            |                          |              |                          |                  |                          |                  |
| Hindu (ref)                                  | 810 (70.5)                                      | 339 (29.5)                        | 1                        |                  |                          |              |                          |                  |                          |                  |
| <b>PARENTAL CHARACTERISTICS</b>              |                                                 |                                   |                          |                  |                          |              |                          |                  |                          |                  |
| Maternal age                                 |                                                 |                                   |                          |                  |                          |              |                          |                  |                          |                  |
| 15-24 years (ref)                            | 378 (76.8)                                      | 114 (23.2)                        | 1                        |                  |                          |              | 1                        |                  |                          |                  |
| 25-34 years                                  | 480 (67.9)                                      | 227 (32.1)                        | <b>0.57 (0.43, 0.75)</b> | <b>&lt;0.001</b> |                          |              | 1.14 (0.73, 1.79)        | 0.561            |                          |                  |
| 35-45 years                                  | 51 (57.6)                                       | 42 (42.4)                         | <b>0.34 (0.21, 0.55)</b> | <b>&lt;0.001</b> |                          |              | 1.09 (0.54, 2.19)        | 0.807            |                          |                  |
| No of previous pregnancies                   |                                                 |                                   |                          |                  |                          |              |                          |                  |                          |                  |
| One (ref)                                    | 314 (76.6)                                      | 96 (23.4)                         | 1                        |                  |                          |              | 1                        |                  | 1                        |                  |
| Two                                          | 267 (75.9)                                      | 85 (24.1)                         | 0.89 (0.63, 1.27)        | 0.527            |                          |              | 0.92 (0.59, 1.44)        | 0.731            | 1.04 (0.71, 1.51)        | 0.854            |
| Three                                        | 166 (67.8)                                      | 79 (32.2)                         | <b>0.53 (0.36, 0.78)</b> | <b>0.001</b>     |                          |              | <b>0.52 (0.30, 0.90)</b> | <b>0.020</b>     | <b>0.60 (0.40, 0.89)</b> | <b>0.011</b>     |
| Four or more                                 | 169 (58.1)                                      | 122 (41.9)                        | <b>0.37 (0.26, 0.53)</b> | <b>&lt;0.001</b> |                          |              | <b>0.34 (0.19, 0.60)</b> | <b>&lt;0.001</b> | <b>0.38 (0.26, 0.55)</b> | <b>&lt;0.001</b> |

| Indicators                                           | Yes-received adequate supervision (N=916) n (%) | No- did not receive (N=383) n (%) | Unadjusted OR (95% CI)   | p value          | Model 1 AOR (95% CI)     | p value          | Model 2 AOR (95% CI)     | p value          | Model 3 AOR (95% CI)     | p value          |
|------------------------------------------------------|-------------------------------------------------|-----------------------------------|--------------------------|------------------|--------------------------|------------------|--------------------------|------------------|--------------------------|------------------|
| <b>Maternal education</b>                            |                                                 |                                   |                          |                  |                          |                  |                          |                  |                          |                  |
| Never went to school (ref)                           | 726 (68.6)                                      | 333 (31.4)                        | 1                        |                  |                          |                  | 1                        |                  | 1                        |                  |
| Primary                                              | 72 (76.6)                                       | 22 (23.4)                         | 1.68 (1.00, 2.84)        | 0.052            |                          |                  | 1.61 (0.91, 2.85)        | 0.104            | 1.62 (0.92, 2.84)        | 0.093            |
| Secondary or above                                   | 118 (80.8)                                      | 28 (19.2)                         | <b>1.92 (1.22, 3.01)</b> | <b>0.005</b>     |                          |                  | 1.57 (0.94, 2.63)        | 0.086            | <b>1.67 (1.02, 2.75)</b> | <b>0.043</b>     |
| <b>Father's education</b>                            |                                                 |                                   |                          |                  |                          |                  |                          |                  |                          |                  |
| Never went to school (ref)                           | 581 (69.8)                                      | 251 (30.2)                        | 1                        |                  |                          |                  | 1                        |                  | 1                        |                  |
| Primary                                              | 105 (67.3)                                      | 51 (32.7)                         | 0.93 (0.63, 1.37)        | 0.698            |                          |                  | 0.89 (0.59, 1.37)        | 0.608            |                          |                  |
| Secondary or above                                   | 230 (74.0)                                      | 81 (26.0)                         | 1.23 (0.90, 1.67)        | 0.194            |                          |                  | 1.06 (0.74, 1.51)        | 0.742            |                          |                  |
| <b>Antenatal visits</b>                              |                                                 |                                   |                          |                  |                          |                  |                          |                  |                          |                  |
| None (ref)                                           | 272 (64.2)                                      | 152 (35.8)                        | 1                        |                  |                          |                  | 1                        |                  | 1                        |                  |
| 1-3 visits                                           | 450 (72.8)                                      | 168 (27.2)                        | <b>1.51 (1.13, 2.01)</b> | <b>0.005</b>     |                          |                  | 1.22 (0.89, 1.68)        | 0.214            |                          |                  |
| 4+ visits                                            | 194 (75.5)                                      | 63 (24.5)                         | <b>1.70 (1.17, 2.46)</b> | <b>0.005</b>     |                          |                  | 1.15 (0.75, 1.77)        | 0.513            |                          |                  |
| <b>Place of delivery</b>                             |                                                 |                                   |                          |                  |                          |                  |                          |                  |                          |                  |
| Home (ref)                                           | 701 (69.5)                                      | 308 (30.5)                        | 1                        |                  |                          |                  | 1                        |                  | 1                        |                  |
| Health facility                                      | 197 (74.1)                                      | 69 (25.9)                         | 1.26 (0.91, 1.75)        | 0.159            |                          |                  | 0.93 (0.63, 1.36)        | 0.698            |                          |                  |
| <b>CHILD CHARACTERISTICS</b>                         |                                                 |                                   |                          |                  |                          |                  |                          |                  |                          |                  |
| <b>Child sex</b>                                     |                                                 |                                   |                          |                  |                          |                  |                          |                  |                          |                  |
| Male (ref)                                           | 504 (71.9)                                      | 197 (28.1)                        | 1                        |                  |                          | 1                | 1                        |                  | 1                        |                  |
| Female                                               | 412 (68.9)                                      | 186 (31.1)                        | 0.84 (0.65, 1.09)        | 0.185            | 0.81 (0.62, 1.60)        | 0.123            | 0.81 (0.61, 1.06)        | 0.128            | 0.81 (0.62, 1.07)        | 0.139            |
| <b>Child age group in months at follow-up survey</b> |                                                 |                                   |                          |                  |                          |                  |                          |                  |                          |                  |
| 7 to 24                                              | 311 (77.4)                                      | 91 (22.6)                         | <b>1.92 (1.41, 2.61)</b> | <b>&lt;0.001</b> | <b>1.86 (1.34, 2.57)</b> | <b>&lt;0.001</b> | <b>2.06 (1.45, 2.90)</b> | <b>&lt;0.001</b> | <b>1.94 (1.39, 2.70)</b> | <b>&lt;0.001</b> |
| 25 to 42                                             | 248 (71.3)                                      | 100 (28.7)                        | 1.34 (0.99, 1.83)        | 0.060            | 1.34 (0.97, 1.85)        | 0.074            | 1.38 (0.99, 1.92)        | 0.059            | 1.35 (0.97, 1.87)        | 0.073            |
| 43 to 59 (ref)                                       | 357 (65.0)                                      | 192 (35.0)                        | 1                        |                  | 1                        |                  | 1                        |                  | 1                        |                  |

For interpretation purposes, OR >1 indicates children are more likely to have adequate supervision and OR <1 indicates children are less likely.

Model 1 (N= 1231) included wealth quintile, child sex, child age, trial allocation as a priori covariates plus MAHP, HH size, ethnicity from unadjusted analysis with a p<0.2.

Model 2 (N=1212) included wealth quintile, maternal education, child sex, child age, trial allocation as a priori covariates plus maternal age, parity, fathers' education, antenatal visits, place of delivery from unadjusted analysis with a p<0.2. plus, HH size from Model 1 with p<0.05.

Model 3 (N=1235) included wealth quintile, maternal education, child sex, child age, trial allocation as a priori covariates plus, HH size, parity from Model 2 with p<0.05.

Abbreviation: OR Odds Ratio, AOR Adjusted Odds Ratio



**Supplementary table 16: Multivariable logistic regression analysis of factors associated with attendance of early childhood education by children aged 36-59 months**

| Indicators                                   | Yes – access to ECE (N=190) n (%) | No- No access (N=527) n (%) | Unadjusted OR (95% CI)   | p value      | Model 1 AOR (95% CI)     | p value      | Model 2 AOR (95% CI)     | p value      | Model 3 AOR (95% CI)     | p value      |
|----------------------------------------------|-----------------------------------|-----------------------------|--------------------------|--------------|--------------------------|--------------|--------------------------|--------------|--------------------------|--------------|
| <b>HOUSEHOLD CHARACTERISTICS</b>             |                                   |                             |                          |              |                          |              |                          |              |                          |              |
| Wealth Quintile                              |                                   |                             |                          |              |                          |              |                          |              |                          |              |
| Lowest (ref)                                 | 30 (21.3)                         | 111 (78.7)                  | 1                        |              | 1                        |              | 1                        |              | 1                        |              |
| Second                                       | 31 (22.3)                         | 108 (77.7)                  | 0.99 (0.52, 1.89)        | 0.983        | 0.10 (0.47, 2.06)        | 0.975        | 0.96 (0.48, 1.93)        | 0.911        | 1.05 (0.53, 2.08)        | 0.888        |
| Middle                                       | 35 (21.7)                         | 126 (78.3)                  | 1.02 (0.55, 1.91)        | 0.940        | 1.20 (0.57, 2.49)        | 0.633        | 0.98 (0.50, 1.94)        | 0.962        | 1.01 (0.51, 1.98)        | 0.981        |
| Fourth                                       | 31 (25.2)                         | 92 (74.8)                   | 1.21 (0.63, 2.33)        | 0.569        | 1.50 (0.69, 3.28)        | 0.308        | 1.12 (0.53, 2.34)        | 0.767        | 1.18 (0.56, 2.45)        | 0.664        |
| Highest                                      | 48 (41.7)                         | 67 (58.3)                   | <b>2.79 (1.46, 5.34)</b> | <b>0.002</b> | <b>3.33 (1.51, 7.33)</b> | <b>0.003</b> | <b>2.80 (1.32, 5.97)</b> | <b>0.008</b> | <b>2.93 (1.39, 6.19)</b> | <b>0.005</b> |
| Months of adequate food provisioning (MAHFP) |                                   |                             |                          |              |                          |              |                          |              |                          |              |
| For up to 7 months                           | 18 (19.6)                         | 152 (77.6)                  | 0.70 (0.36, 1.35)        | 0.287        |                          |              |                          |              |                          |              |
| For 8 to 11 months                           | 44 (22.4)                         | 298 (70.1)                  | 0.76 (0.48, 1.21)        | 0.246        |                          |              |                          |              |                          |              |
| For 12 months (ref)                          | 127 (29.9)                        | 265 (70.1)                  | 1                        |              |                          |              |                          |              |                          |              |
| Migration of at least one household member   |                                   |                             |                          |              |                          |              |                          |              |                          |              |
| No (ref)                                     | 113 (29.9)                        | 265 (70.1)                  | 1                        |              | 1                        |              |                          |              |                          |              |
| Yes                                          | 77 (23.0)                         | 258 (77.0)                  | <b>0.61 (0.41, 0.90)</b> | <b>0.013</b> | 0.71 (0.44, 1.13)        | 0.144        |                          |              |                          |              |
| Household size                               |                                   |                             |                          |              |                          |              |                          |              |                          |              |
| 1-5 members                                  | 41 (25.8)                         | 118 (74.2)                  | 1.05 (0.65, 1.68)        | 0.850        | 1.06 (0.60, 1.88)        | 0.829        |                          |              |                          |              |
| 6-10 members (ref)                           | 112 (25.3)                        | 330 (74.7)                  | 1                        |              | 1                        |              |                          |              |                          |              |
| >=11 members                                 | 34 (32.1)                         | 72 (67.9)                   | 1.45 (0.86, 2.47)        | 0.165        | 1.21 (0.65, 2.24)        | 0.547        |                          |              |                          |              |
| Health care access                           |                                   |                             |                          |              |                          |              |                          |              |                          |              |
| No (ref)                                     | 138 (24.6)                        | 423 (75.4)                  | 1                        |              | 1                        |              |                          |              |                          |              |
| Yes                                          | 29 (34.5)                         | 55 (65.5)                   | 1.66 (0.93, 2.95)        | 0.085        | 1.49 (0.77, 2.87)        | 0.232        |                          |              |                          |              |
| Ethnicity/Caste                              |                                   |                             |                          |              |                          |              |                          |              |                          |              |
| Dalit/ Muslim (ref)                          | 54 (24.2)                         | 169 (75.8)                  | 1                        |              | 1                        |              |                          |              |                          |              |
| Janjati/other terai caste                    | 89 (25.6)                         | 258 (74.4)                  | 1.15 (0.73, 1.81)        | 0.559        | 1.14 (0.64, 2.01)        | 0.663        |                          |              |                          |              |
| Yadav/ Brahmin                               | 47 (32.0)                         | 100 (68.0)                  | 1.55 (0.89, 2.67)        | 0.118        | 1.47 (0.74, 2.92)        | 0.265        |                          |              |                          |              |
| Religion                                     |                                   |                             |                          |              |                          |              |                          |              |                          |              |
| Non-Hindu                                    | 21 (23.1)                         | 70 (76.9)                   | 0.83 (0.46, 1.51)        | 0.548        |                          |              |                          |              |                          |              |
| Hindu (ref)                                  | 169 (27.0)                        | 457 (73.0)                  | 1                        |              |                          |              |                          |              |                          |              |
| <b>PARENTAL CHARACTERISTICS</b>              |                                   |                             |                          |              |                          |              |                          |              |                          |              |
| Maternal age                                 |                                   |                             |                          |              |                          |              |                          |              |                          |              |
| 15-24 years (ref)                            | 55 (24.8)                         | 167 (75.2)                  | 1                        |              |                          |              |                          |              |                          |              |
| 25-34 years                                  | 123 (28.0)                        | 316 (72.0)                  | 1.26 (0.82, 1.92)        | 0.288        |                          |              |                          |              |                          |              |
| 35-45 years                                  | 12 (21.8)                         | 43 (78.2)                   | 1.03 (0.46, 2.30)        | 0.947        |                          |              |                          |              |                          |              |
| No of previous pregnancies                   |                                   |                             |                          |              |                          |              |                          |              |                          |              |
| One (ref)                                    | 58 (27.8)                         | 151 (72.2)                  | 1                        |              |                          |              | 1                        |              |                          |              |
| Two                                          | 57 (27.9)                         | 147 (72.1)                  | 1.08 (0.66, 1.77)        | 0.751        |                          |              | 1.07 (0.61, 1.89)        | 0.813        |                          |              |
| Three                                        | 40 (29.4)                         | 96 (70.6)                   | 1.22 (0.70, 2.11)        | 0.480        |                          |              | 1.50 (0.80, 2.80)        | 0.202        |                          |              |
| Four or more                                 | 34 (20.4)                         | 133 (79.6)                  | 0.69 (0.40, 1.19)        | 0.186        |                          |              | 0.83 (0.44, 1.58)        | 0.578        |                          |              |

| Indicators                                    | Yes – access to ECE (N=190) n (%) | No- No access (N=527) n (%) | Unadjusted OR (95% CI)   | p value          | Model 1 AOR (95% CI)     | p value                  | Model 2 AOR (95% CI)     | p value                  | Model 3 AOR (95% CI)     | p value          |
|-----------------------------------------------|-----------------------------------|-----------------------------|--------------------------|------------------|--------------------------|--------------------------|--------------------------|--------------------------|--------------------------|------------------|
| Maternal education                            |                                   |                             |                          |                  |                          |                          |                          |                          |                          |                  |
| Never went to school (ref)                    | 147 (25.3)                        | 433 (74.7)                  |                          | 1                |                          |                          | 1                        |                          | 1                        |                  |
| Primary                                       | 18 (31.6)                         | 39 (68.4)                   | 1.46 (0.73, 2.94)        | 0.289            |                          | 1.39 (0.62, 3.12)        | 0.426                    | 1.43 (0.65, 3.15)        | 0.381                    |                  |
| Secondary or above                            | 25 (31.2)                         | 55 (68.8)                   | 1.38 (0.77, 2.48)        | 0.282            |                          | 0.95 (0.47, 1.94)        | 0.888                    | 0.98 (0.49, 1.97)        | 0.957                    |                  |
| Father's education                            |                                   |                             |                          |                  |                          |                          |                          |                          |                          |                  |
| Never went to school (ref)                    | 114 (25.6)                        | 332 (74.4)                  |                          | 1                |                          |                          |                          |                          |                          |                  |
| Primary                                       | 23 (23.0)                         | 77 (77.0)                   | 0.81 (0.46, 1.46)        | 0.490            |                          |                          |                          |                          |                          |                  |
| Secondary or above                            | 53 (31.0)                         | 118 (69.0)                  | 1.27 (0.81, 1.99)        | 0.293            |                          |                          |                          |                          |                          |                  |
| Antenatal visits                              |                                   |                             |                          |                  |                          |                          |                          |                          |                          |                  |
| None (ref)                                    | 55 (21.7)                         | 199 (78.3)                  |                          | 1                |                          |                          | 1                        |                          |                          |                  |
| 1-3 visits                                    | 93 (27.4)                         | 247 (72.6)                  | 1.48 (0.96, 2.31)        | 0.079            |                          | 1.33 (0.81, 2.19)        | 0.260                    |                          |                          |                  |
| 4+ visits                                     | 42 (34.1)                         | 81 (65.9)                   | <b>1.78 (1.02, 3.10)</b> | <b>0.041</b>     |                          | 1.15 (0.58, 2.28)        | 0.680                    |                          |                          |                  |
| Place of delivery                             |                                   |                             |                          |                  |                          |                          |                          |                          |                          |                  |
| Home (ref)                                    | 138 (23.4)                        | 451 (76.6)                  |                          | 1                |                          |                          | 1                        |                          | 1                        |                  |
| Health facility                               | 46 (41.1)                         | 66 (58.9)                   | <b>2.07 (1.26, 3.41)</b> | <b>0.004</b>     |                          | <b>1.94 (1.06, 3.57)</b> | <b>0.032</b>             | <b>1.95 (1.10, 3.46)</b> | <b>0.022</b>             |                  |
| <b>CHILD CHARACTERISTICS</b>                  |                                   |                             |                          |                  |                          |                          |                          |                          |                          |                  |
| Child sex                                     |                                   |                             |                          |                  |                          |                          |                          |                          |                          |                  |
| Male (ref)                                    | 113 (28.5)                        | 283 (71.5)                  |                          | 1                |                          | 1                        | 1                        |                          | 1                        |                  |
| Female                                        | 77 (24.0)                         | 244 (76.0)                  | 0.89 (0.59, 1.32)        | 0.549            | 0.91 (0.57, 1.45)        | 0.679                    | 0.74 (0.47, 1.17)        | 0.199                    | 0.78 (0.49, 1.22)        | 0.272            |
| Child age group in months at follow-up survey |                                   |                             |                          |                  |                          |                          |                          |                          |                          |                  |
| 36 to 47 (ref)                                | 48 (16.1)                         | 251 (83.9)                  |                          | 1                |                          | 1                        | 1                        |                          | 1                        |                  |
| 48 to 59                                      | 142 (34.0)                        | 276 (66.0)                  | <b>3.53 (2.28, 5.48)</b> | <b>&lt;0.001</b> | <b>3.91 (2.40, 6.38)</b> | <b>&lt;0.001</b>         | <b>3.85 (2.38, 6.23)</b> | <b>&lt;0.001</b>         | <b>3.87 (2.40, 6.24)</b> | <b>&lt;0.001</b> |

For interpretation purposes, a OR >1 indicates children are more likely to have attended early childhood education and OR<1 indicates children are less likely.

Model 1 (N= 611) included wealth quintile, child sex, child age, trial allocation as a priori covariates plus migration of HH member, health care access, HH size, ethnicity from unadjusted analysis with a p<0.2.

Model 2 (N=665) included wealth quintile, maternal education, child sex, child age, trial allocation as a priori covariates plus parity, antenatal visits, place of delivery from unadjusted analysis with a p<0.2.

Model 3 (N=665) included wealth quintile, maternal education, child sex, child age, trial allocation as a priori covariates plus place of delivery from Model 2 with p<0.05.

Abbreviation: OR Odds Ratio, AOR Adjusted Odds Ratio, ECE Early Childhood Education

**Supplementary table 17: Multivariable logistic regression analysis of factors associated with developmentally on track according to ECDI score of children aged 36-59 months**

| Indicators                                   | Yes- on track<br>(N=277)<br>n (%) | No- not on track<br>(N=444)<br>n (%) | Unadjusted<br>OR (95% CI) | p value | Model 1<br>AOR (95% CI) | p value | Model 2<br>AOR (95% CI) | p value | Model 3<br>AOR (95% CI) | p value |
|----------------------------------------------|-----------------------------------|--------------------------------------|---------------------------|---------|-------------------------|---------|-------------------------|---------|-------------------------|---------|
| <b>HOUSEHOLD CHARACTERISTICS</b>             |                                   |                                      |                           |         |                         |         |                         |         |                         |         |
| Wealth Quintile                              |                                   |                                      |                           |         |                         |         |                         |         |                         |         |
| Lowest (ref)                                 | 49 (34.3)                         | 94 (65.7)                            | 1                         |         | 1                       |         | 1                       |         | 1                       |         |
| Second                                       | 46 (33.1)                         | 93 (66.9)                            | 0.88 (0.51, 1.52)         | 0.636   | 0.95 (0.55, 1.65)       | 0.858   | 0.94 (0.54, 1.65)       | 0.836   | 0.96 (0.55, 1.67)       | 0.882   |
| Middle                                       | 68 (42.0)                         | 94 (58.0)                            | 1.39 (0.83, 2.34)         | 0.211   | 1.51 (0.89, 2.54)       | 0.125   | 1.59 (0.93, 2.71)       | 0.089   | 1.61 (0.95, 2.73)       | 0.078   |
| Fourth                                       | 46 (37.4)                         | 77 (62.6)                            | 0.91 (0.52, 1.60)         | 0.755   | 1.01 (0.57, 1.77)       | 0.983   | 1.10 (0.61, 1.96)       | 0.755   | 1.11 (0.62, 1.97)       | 0.725   |
| Highest                                      | 48 (41.4)                         | 68 (58.6)                            | 1.29 (0.73, 2.27)         | 0.386   | 1.38 (0.78, 2.45)       | 0.274   | 1.57 (0.84, 2.92)       | 0.156   | 1.62 (0.88, 2.98)       | 0.120   |
| Months of adequate food provisioning (MAHFP) |                                   |                                      |                           |         |                         |         |                         |         |                         |         |
| For up to 7 months                           | 36 (39.1)                         | 56 (60.9)                            | 1.27 (0.75, 2.16)         | 0.369   |                         |         |                         |         |                         |         |
| For 8 to 11 months                           | 77 (38.5)                         | 123 (61.5)                           | 1.02 (0.69, 1.51)         | 0.906   |                         |         |                         |         |                         |         |
| For 12 months (ref)                          | 163 (38.4)                        | 262 (61.6)                           | 1                         |         |                         |         |                         |         |                         |         |
| Migration of at least one household member   |                                   |                                      |                           |         |                         |         |                         |         |                         |         |
| No (ref)                                     | 139 (36.6)                        | 241 (63.4)                           | 1                         |         |                         |         |                         |         |                         |         |
| Yes                                          | 135 (40.1)                        | 202 (59.9)                           | 1.16 (0.82, 1.62)         | 0.400   |                         |         |                         |         |                         |         |
| Household size                               |                                   |                                      |                           |         |                         |         |                         |         |                         |         |
| 1-5 members                                  | 72 (45.3)                         | 87 (54.7)                            | 1.29 (0.86, 1.94)         | 0.218   |                         |         |                         |         |                         |         |
| 6-10 members (ref)                           | 165 (37.0)                        | 281 (63.0)                           | 1                         |         |                         |         |                         |         |                         |         |
| >=11 members                                 | 36 (34.0)                         | 70 (66.0)                            | 0.83 (0.51, 1.35)         | 0.452   |                         |         |                         |         |                         |         |
| Health care access                           |                                   |                                      |                           |         |                         |         |                         |         |                         |         |
| No (ref)                                     | 207 (36.8)                        | 355 (63.2)                           | 1                         |         |                         |         |                         |         |                         |         |
| Yes                                          | 36 (42.4)                         | 49 (57.6)                            | 1.25 (0.75, 2.09)         | 0.400   |                         |         |                         |         |                         |         |
| Ethnicity/Caste                              |                                   |                                      |                           |         |                         |         |                         |         |                         |         |
| Dalit/ Muslim (ref)                          | 84 (37.3)                         | 141 (62.7)                           | 1                         |         |                         |         |                         |         |                         |         |
| Janjati/other terai caste                    | 132 (37.8)                        | 217 (62.2)                           | 1.04 (0.70, 1.53)         | 0.853   |                         |         |                         |         |                         |         |
| Yadav/ Brahmin                               | 61 (41.5)                         | 86 (58.5)                            | 1.21 (0.75, 1.95)         | 0.444   |                         |         |                         |         |                         |         |
| Religion                                     |                                   |                                      |                           |         |                         |         |                         |         |                         |         |
| Non-Hindu                                    | 35 (38.0)                         | 57 (62.0)                            | 0.87 (0.52, 1.46)         | 0.600   |                         |         |                         |         |                         |         |
| Hindu (ref)                                  | 242 (38.5)                        | 387 (61.5)                           | 1                         |         |                         |         |                         |         |                         |         |
| <b>PARENTAL CHARACTERISTICS</b>              |                                   |                                      |                           |         |                         |         |                         |         |                         |         |
| Maternal age                                 |                                   |                                      |                           |         |                         |         |                         |         |                         |         |
| 15-24 years (ref)                            | 78 (35.1)                         | 144 (64.9)                           | 1                         |         |                         |         | 1                       |         |                         |         |
| 25-34 years                                  | 175 (39.5)                        | 268 (60.5)                           | 1.29 (0.89, 1.86)         | 0.184   |                         |         | 0.93 (0.53, 1.65)       | 0.813   |                         |         |
| 35-45 years                                  | 23 (41.8)                         | 32 (58.2)                            | 1.55 (0.79, 3.06)         | 0.202   |                         |         | 1.04 (0.41, 2.64)       | 0.939   |                         |         |
| No of previous pregnancies                   |                                   |                                      |                           |         |                         |         |                         |         |                         |         |
| One (ref)                                    | 71 (33.8)                         | 139 (66.2)                           | 1                         |         |                         |         | 1                       |         |                         |         |
| Two                                          | 85 (41.7)                         | 119 (58.3)                           | 1.55 (1.00, 2.42)         | 0.050   |                         |         | 1.61 (0.91, 2.86)       | 0.100   |                         |         |
| Three                                        | 52 (37.7)                         | 86 (62.3)                            | 1.32 (0.80, 2.16)         | 0.273   |                         |         | 1.39 (0.70, 2.75)       | 0.351   |                         |         |
| Four or more                                 | 68 (40.5)                         | 100 (59.5)                           | 1.60 (1.00, 2.55)         | 0.048   |                         |         | 1.73 (0.84, 3.54)       | 0.136   |                         |         |

| Indicators                                    | Yes- on track<br>(N=277)<br>n (%) | No- not on track<br>(N=444)<br>n (%) | Unadjusted<br>OR (95% CI) | p value      | Model 1<br>AOR (95% CI) | p value | Model 2<br>AOR (95% CI)  | p value      | Model 3<br>AOR (95% CI)  | p value      |
|-----------------------------------------------|-----------------------------------|--------------------------------------|---------------------------|--------------|-------------------------|---------|--------------------------|--------------|--------------------------|--------------|
| Maternal education                            |                                   |                                      |                           |              |                         |         |                          |              |                          |              |
| Never went to school (ref)                    | 230 (39.4)                        | 354 (60.6)                           | 1                         |              |                         |         | 1                        |              | 1                        |              |
| Primary                                       | 19 (33.3)                         | 38 (66.7)                            | 0.76 (0.40, 1.44)         | 0.402        |                         |         | 0.63 (0.31, 1.26)        | 0.189        | 0.60 (0.30, 1.19)        | 0.141        |
| Secondary or above                            | 28 (35.0)                         | 52 (65.0)                            | 0.78 (0.46, 1.34)         | 0.372        |                         |         | 0.72 (0.39, 1.32)        | 0.282        | 0.68 (0.38, 1.24)        | 0.207        |
| Father's education                            |                                   |                                      |                           |              |                         |         |                          |              |                          |              |
| Never went to school (ref)                    | 170 (37.9)                        | 279 (62.1)                           | 1                         |              |                         |         |                          |              |                          |              |
| Primary                                       | 38 (37.6)                         | 63 (62.4)                            | 1.11 (0.68, 1.81)         | 0.687        |                         |         |                          |              |                          |              |
| Secondary or above                            | 69 (40.4)                         | 102 (59.6)                           | 1.06 (0.71, 1.58)         | 0.791        |                         |         |                          |              |                          |              |
| Antenatal visits                              |                                   |                                      |                           |              |                         |         |                          |              |                          |              |
| None (ref)                                    | 90 (35.3)                         | 165 (64.7)                           | 1                         |              |                         |         | 1                        |              |                          |              |
| 1-3 visits                                    | 130 (38.1)                        | 211 (61.9)                           | 1.20 (0.82, 1.75)         | 0.347        |                         |         | 1.18 (0.78, 1.77)        | 0.433        |                          |              |
| 4+ visits                                     | 57 (45.6)                         | 68 (54.4)                            | 1.58 (0.97, 2.58)         | 0.064        |                         |         | 1.59 (0.93, 2.74)        | 0.091        |                          |              |
| Place of delivery                             |                                   |                                      |                           |              |                         |         |                          |              |                          |              |
| Home (ref)                                    | 220 (37.2)                        | 372 (62.8)                           | 1                         |              |                         |         |                          |              |                          |              |
| Health facility                               | 49 (43.4)                         | 64 (56.6)                            | 1.20 (0.77, 1.90)         | 0.422        |                         |         |                          |              |                          |              |
| <b>CHILD CHARACTERISTICS</b>                  |                                   |                                      |                           |              |                         |         |                          |              |                          |              |
| Child sex                                     |                                   |                                      |                           |              |                         |         |                          |              |                          |              |
| Male (ref)                                    | 140 (35.4)                        | 256 (64.6)                           | 1                         |              | 1                       |         | 1                        |              | 1                        |              |
| Female                                        | 137 (42.2)                        | 188 (57.8)                           | 1.40 (0.99, 1.97)         | 0.057        | 1.34 (0.94, 1.92)       | 0.107   | 1.38 (0.96, 1.99)        | 0.081        | 1.37 (0.95, 1.96)        | 0.088        |
| Child age group in months at follow-up survey |                                   |                                      |                           |              |                         |         |                          |              |                          |              |
| 36 to 47 (ref)                                | 103 (34.3)                        | 197 (65.7)                           | 1                         |              | 1                       |         | 1                        |              | 1                        |              |
| 48 to 59                                      | 174 (41.3)                        | 247 (58.7)                           | <b>1.45 (1.03, 2.04)</b>  | <b>0.034</b> | 1.44 (1.01, 2.05)       | 0.045   | <b>1.45 (1.01, 2.09)</b> | <b>0.043</b> | <b>1.46 (1.02, 2.08)</b> | <b>0.037</b> |

For interpretation purposes, a OR >1 indicates children are more likely to on track with their ECDI score and OR<1 indicates children are less likely.

Model 1 (N= 683) included wealth quintile, child sex, child age, trial allocation as a priori covariates. There were no HH level covariates from unadjusted analysis with a p<0.2.

Model 2 (N=682) included wealth quintile, maternal education, child sex, child age, trial allocation as a priori covariates plus maternal age, parity, antenatal visits from unadjusted analysis with a p<0.2.

Model 3 (N=683) included wealth quintile, maternal education, child sex, child age, trial allocation covariates.

Abbreviation: ECDI Early Childhood Development Index, OR Odds Ratio, AOR Adjusted Odds Ratio
